# Supplementary material
Source: publisher figshare collection journal article supplement (https://brill.figshare.com/articles/dataset/_/24160281)
Supplement: Supplementary file 1 [file 1]

## Sheet: DAY -17 vs DAY -24
Column #	Column ID	gene_assignment	Gene Symbol	RefSeq	GO_biological_process	GO_cellular_component	GO_molecular_function	P-value (Time)	P-value (-17 days vs. -24 days)	Ratio (-17 days vs. -24 days)	Fold-Change (-17 days vs. -24 days)	Fold-Change (-17 days vs. -24 days) (Description)	F(Time)	SS(Time)	SS(Error)	F(Error)
3135	18146297	NM_001201881 // CG42680 // CG42680 gene product from transcript CG42680-RA // 35B3-35B3	CG42680	NM_001201881	NM_001201881 // GO:0008150 // biological_process // no biological data available /// F	NM_001201881 // GO:0005575 // cellular_component // no biological data available /// F	NM_001201881 // GO:0003674 // molecular_function // no biological data available /// F	0.0170777	0.0045898	6.60573	6.60573	-17 days up vs -24 days	5.07058	17.1004	8.43117	1
11709	18195399	---		---	---	---	---	0.172431	0.0292752	2.81523	2.81523	-17 days up vs -24 days	1.98794	4.11676	5.17717	1
14683	18212325	---		---	---	---	---	5.24e-06	0.000662104	2.72148	2.72148	-17 days up vs -24 days	37.7736	20.0246	1.3253	1
357	18130889	---		---	---	---	---	0.159167	0.0345074	2.6357	2.6357	-17 days up vs -24 days	2.07536	4.06956	4.90223	1
7509	18171376	NM_001275116 // CG32214 // CG32214 gene product from transcript CG32214-RC // 76B3-76B3	CG32214	NM_001275116	NM_001275116 // GO:0008150 // biological_process // no biological data available /// N	NM_001275116 // GO:0005575 // cellular_component // no biological data available /// N	NM_001275116 // GO:0003674 // molecular_function // no biological data available /// N	0.0273334	0.0187392	2.38645	2.38645	-17 days up vs -24 days	4.33352	5.21602	3.00911	1
13478	18205195	NR_026603 // Su(Ste):CR42409 // ncRNA // --- // 7354441 /// NR_133547 // Su(Ste):CR4579	Su(Ste):CR42409	NR_026603	---	---	---	0.000152111	0.00761411	2.24586	2.24586	-17 days up vs -24 days	17.8113	13.1288	1.84276	1
16294	18220372	---		---	---	---	---	0.00620132	0.0123742	2.00938	2.00938	-17 days up vs -24 days	6.90419	4.53073	1.64057	1
142	18130277	---		---	---	---	---	0.0203729	0.0315477	1.87914	1.87914	-17 days up vs -24 days	4.78633	3.81132	1.99074	1
8702	18178258	NM_140602 // CG13050 // CG13050 gene product from transcript CG13050-RA // 72D12-72D12	CG13050	NM_140602	---	---	---	0.0585653	0.0074701	1.70835	1.70835	-17 days up vs -24 days	3.26937	1.04862	0.80185	1
134	18130261	---		---	---	---	---	0.170574	0.0196443	1.70786	1.70786	-17 days up vs -24 days	1.9997	0.929557	1.16212	1
12307	18198737	NM_142766 // CG5386 // CG5386 gene product from transcript CG5386-RA // 94A5-94A5 // 42	CG5386	NM_142766	NM_142766 // GO:0000381 // regulation of alternative mRNA splicing, via spliceosome //	NM_142766 // GO:0005575 // cellular_component // no biological data available /// NM_1	NM_142766 // GO:0003674 // molecular_function // no biological data available /// NM_1	0.0012867	0.000599709	1.63934	1.63934	-17 days up vs -24 days	10.5799	1.33048	0.314387	1
8821	18178862	NM_140858 // CG18294 // CG18294 gene product from transcript CG18294-RA // 76B3-76B3 //	CG18294	NM_140858	---	---	---	0.0131909	0.00509569	1.61122	1.61122	-17 days up vs -24 days	5.50442	1.22715	0.557346	1
633	18132683	---		---	---	---	---	0.00780847	0.0444125	1.61073	1.61073	-17 days up vs -24 days	6.4548	3.46885	1.34352	1
646	18132732	---		---	---	---	---	0.00780847	0.0444125	1.61073	1.61073	-17 days up vs -24 days	6.4548	3.46885	1.34352	1
647	18132734	---		---	---	---	---	0.00780847	0.0444125	1.61073	1.61073	-17 days up vs -24 days	6.4548	3.46885	1.34352	1
2152	18140900	NM_001169504 // osp // outspread // 35B3-35B4|2-50.1 cM // 34850 /// FBtr0301496 // osp	osp	NM_001169504	NM_001169504 // GO:0008150 // biological_process // no biological data available /// F	NM_001169504 // GO:0005575 // cellular_component // no biological data available /// F	NM_001169504 // GO:0003674 // molecular_function // no biological data available /// F	0.00780847	0.0444125	1.61073	1.61073	-17 days up vs -24 days	6.4548	3.46885	1.34352	1
7486	18171266	---		---	---	---	---	0.00780847	0.0444125	1.61073	1.61073	-17 days up vs -24 days	6.4548	3.46885	1.34352	1
7487	18171268	---		---	---	---	---	0.00780847	0.0444125	1.61073	1.61073	-17 days up vs -24 days	6.4548	3.46885	1.34352	1
7488	18171270	---		---	---	---	---	0.00780847	0.0444125	1.61073	1.61073	-17 days up vs -24 days	6.4548	3.46885	1.34352	1
12643	18200510	---		---	---	---	---	0.129183	0.0176051	1.55337	1.55337	-17 days up vs -24 days	2.30845	0.694244	0.751851	1
7257	18170030	NM_001275117 // CG12519 // CG12519 gene product from transcript CG12519-RB // 76B3-76B3	CG12519	NM_001275117	---	---	---	0.00778785	0.00159108	1.5465	1.5465	-17 days up vs -24 days	6.45984	0.833984	0.322757	1
10709	18189258	---		---	---	---	---	0.0899181	0.0318486	1.51768	1.51768	-17 days up vs -24 days	2.73235	0.955854	0.874572	1
29	18130051	---		---	---	---	---	0.0663958	0.00864622	1.50389	1.50389	-17 days up vs -24 days	3.10794	0.609948	0.490637	1
15809	18218384	NM_001103488 // inaF-D // CG42563 gene product from transcript CG42563-RB // 10D8-10E1	inaF-D	NM_001103488	NM_001103488 // GO:0009416 // response to light stimulus // inferred from mutant phenot	NM_001103488 // GO:0016020 // membrane // inferred from sequence or structural similari	NM_001103488 // GO:0005246 // calcium channel regulator activity // inferred from genet	0.0498319	0.0170292	1.49948	1.49948	-17 days up vs -24 days	3.48256	0.874136	0.62751	1
17	18130025	---		---	---	---	---	0.260949	0.0355306	1.47569	1.47569	-17 days up vs -24 days	1.5507	0.497134	0.801467	1
12959	18202244	NM_001300415 // CG45105 // CG45105 gene product from transcript CG45105-RC // 89A8-89A8	CG45105	NM_001300415	NM_001300415 // GO:0051297 // centrosome organization // inferred from electronic annot	NM_001300415 // GO:0005813 // centrosome // inferred from electronic annotation /// NM	---	0.0119536	0.00193335	1.44524	1.44524	-17 days up vs -24 days	5.67565	0.554153	0.244093	1
13399	18205006	NR_004047 // CR40679 // ribosomal RNA // --- // 5740523	CR40679	NR_004047	---	---	---	0.0663392	0.0322756	1.42269	1.42269	-17 days up vs -24 days	3.10903	0.781584	0.628479	1
7443	18171000	---		---	---	---	---	0.189843	0.0455229	1.41416	1.41416	-17 days up vs -24 days	1.88422	0.541969	0.71909	1
9705	18183823	---		---	---	---	---	0.138235	0.0190173	1.40717	1.40717	-17 days up vs -24 days	2.23198	0.416862	0.466919	1
13447	18205129	NR_048534 // CR40719 // ncRNA // --- // 12798485	CR40719	NR_048534	---	---	---	0.0719754	0.0158624	1.4021	1.4021	-17 days up vs -24 days	3.00604	0.51025	0.424354	1
14011	18208408	NM_001298164 // CG2157 // CG2157 gene product from transcript CG2157-RB // 9F5-9F6 // 3	CG2157	NM_001298164	---	---	---	0.0374801	0.00766686	1.38685	1.38685	-17 days up vs -24 days	3.87433	0.467721	0.301807	1
16177	18219784	---		---	---	---	---	0.00243315	0.0293714	1.37763	1.37763	-17 days up vs -24 days	8.9524	1.77877	0.496731	1
9571	18182932	NM_001275598 // sim // single-minded // 87D11-87D11|3-52.2 cM // 41612 /// NM_001275599	sim	NM_001275598	NM_001275598 // GO:0007398 // ectoderm development // traceable author statement /// N	NM_001275598 // GO:0005634 // nucleus // inferred from direct assay /// NM_001275598 /	NM_001275598 // GO:0000978 // RNA polymerase II core promoter proximal region sequence-	0.0274299	0.0107602	1.37609	1.37609	-17 days up vs -24 days	4.32825	0.563679	0.325582	1
2307	18141683	NM_078749 // mRpS2 // mitochondrial ribosomal protein S2 // 25B1-25B1 // 33688 /// FBtr	mRpS2	NM_078749	NM_078749 // GO:0006412 // translation // inferred from sequence or structural similari	NM_078749 // GO:0005763 // mitochondrial small ribosomal subunit // inferred from seque	NM_078749 // GO:0003735 // structural constituent of ribosome // inferred from sequence	0.268598	0.0491551	1.36666	1.36666	-17 days up vs -24 days	1.52105	0.369985	0.608107	1
506	18131850	NM_001259113 // Idgf2 // Imaginal disc growth factor 2 // 36A1-36A1 // 34979 /// NM_001	Idgf2	NM_001259113	NM_001259113 // GO:0005975 // carbohydrate metabolic process // inferred from electroni	NM_001259113 // GO:0005576 // extracellular region // inferred from direct assay /// N	NM_001259113 // GO:0004568 // chitinase activity // inferred from electronic annotation	0.00803694	0.000808516	1.3617	1.3617	-17 days up vs -24 days	6.39997	0.341019	0.133211	1
10405	18187565	NM_142779 // CG13856 // CG13856 gene product from transcript CG13856-RA // 94A12-94A12	CG13856	NM_142779	---	---	---	0.111037	0.0140486	1.35903	1.35903	-17 days up vs -24 days	2.48243	0.330763	0.333105	1
7023	18168910	NM_206330 // CG7377 // CG7377 gene product from transcript CG7377-RA // 68C13-68C13 //	CG7377	NM_206330	---	---	---	0.0557663	0.0208282	1.35761	1.35761	-17 days up vs -24 days	3.33336	0.518201	0.388647	1
8983	18179686	NM_001274899 // Sox21b // CG32139 gene product from transcript CG32139-RA // 70D2-70D2	Sox21b	NM_001274899	NM_001274899 // GO:0006355 // regulation of transcription, DNA-templated // inferred fr	NM_001274899 // GO:0005634 // nucleus // inferred from sequence or structural similarit	NM_001274899 // GO:0003700 // transcription factor activity, sequence-specific DNA bind	0.163162	0.0342456	1.34787	1.34787	-17 days up vs -24 days	2.04817	0.379677	0.463434	1
273	18130539	---		---	---	---	---	0.0879373	0.0473678	1.34276	1.34276	-17 days up vs -24 days	2.75926	0.586022	0.530959	1
6853	18167974	NM_139726 // lin-28 // CG17334 gene product from transcript CG17334-RA // 64E1-64E1 //	lin-28	NM_139726	NM_139726 // GO:0006355 // regulation of transcription, DNA-templated // inferred from	NM_139726 // GO:0005737 // cytoplasm // inferred from electronic annotation /// FBtr00	NM_139726 // GO:0003677 // DNA binding // inferred from electronic annotation /// NM_1	0.0229938	0.0086213	1.34122	1.34122	-17 days up vs -24 days	4.59681	0.466492	0.253704	1
13645	18206391	NM_001038748 // Cp7Fa // Chorion protein a at 7F // 7F1-7F1 // 3885650 /// FBtr0100003	Cp7Fa	NM_001038748	NM_001038748 // GO:0007304 // chorion-containing eggshell formation // inferred from ex	NM_001038748 // GO:0042600 // chorion // inferred by curator /// NM_001038748 // GO:00	NM_001038748 // GO:0003674 // molecular_function // no biological data available /// F	0.107369	0.0181176	1.34089	1.34089	-17 days up vs -24 days	2.52163	0.340387	0.337467	1
6215	18164146	NM_078941 // CG42382 // CG42382 gene product from transcript CG42382-RA // 45B1-45B1 //	CG42382	NM_078941	NM_078941 // GO:0006281 // DNA repair // inferred from sequence or structural similarit	---	NM_078941 // GO:0046872 // metal ion binding // inferred from electronic annotation //	0.0242456	0.0304169	1.33192	1.33192	-17 days up vs -24 days	4.51516	0.729775	0.404069	1
8979	18179673	NM_001104053 // Cpr65Ax1 // Cuticular protein 65Ax1 // 65A6-65A6 // 5740751 /// NM_0012	Cpr65Ax1	NM_001104053	NM_001104053 // GO:0040003 // chitin-based cuticle development // not recorded /// NM_	NM_001104053 // GO:0031012 // extracellular matrix // not recorded /// NM_001104053 //	NM_001104053 // GO:0005214 // structural constituent of chitin-based cuticle // inferre	0.012891	0.00575284	1.32995	1.32995	-17 days up vs -24 days	5.5441	0.460254	0.207542	1
9245	18180854	NM_001104053 // Cpr65Ax1 // Cuticular protein 65Ax1 // 65A6-65A6 // 5740751 /// NM_0012	Cpr65Ax1	NM_001104053	NM_001104053 // GO:0040003 // chitin-based cuticle development // not recorded /// NM_	NM_001104053 // GO:0031012 // extracellular matrix // not recorded /// NM_001104053 //	NM_001104053 // GO:0005214 // structural constituent of chitin-based cuticle // inferre	0.012891	0.00575284	1.32995	1.32995	-17 days up vs -24 days	5.5441	0.460254	0.207542	1
14645	18212088	NM_130660 // CG2650 // CG2650 gene product from transcript CG2650-RA // 3B2-3B2|1-1.2 c	CG2650	NM_130660	NM_130660 // GO:0007623 // circadian rhythm // inferred from expression pattern /// NM	NM_130660 // GO:0005615 // extracellular space // inferred from sequence or structural	NM_130660 // GO:0003674 // molecular_function // no biological data available /// FBtr	0.0694312	0.00637629	1.32543	1.32543	-17 days up vs -24 days	3.05131	0.256221	0.209927	1
3308	18147031	NM_078945 // FMRFa // FMRFamide // 46C4-46C4 // 36030 /// FBtr0088383 // FMRFa // FMRFa	FMRFa	NM_078945	NM_078945 // GO:0002209 // behavioral defense response // inferred from direct assay /	NM_078945 // GO:0005615 // extracellular space // inferred by curator /// NM_078945 //	NM_078945 // GO:0005179 // hormone activity // non-traceable author statement /// NM_0	0.222724	0.0401953	1.31974	1.31974	-17 days up vs -24 days	1.71504	0.29688	0.432759	1
6064	18163164	NM_137137 // CG30479 // CG30479 gene product from transcript CG30479-RA // 51B10-51B10	CG30479	NM_137137	---	---	---	0.016824	0.00708655	1.31806	1.31806	-17 days up vs -24 days	5.09515	0.426553	0.209294	1
5382	18159582	NM_136813 // Cpr47Ec // Cuticular protein 47Ec // 47E3-47E3 // 36191 /// FBtr0088189 //	Cpr47Ec	NM_136813	NM_136813 // GO:0040003 // chitin-based cuticle development // not recorded /// NM_136	NM_136813 // GO:0031012 // extracellular matrix // not recorded /// NM_136813 // GO:00	NM_136813 // GO:0005214 // structural constituent of chitin-based cuticle // inferred f	0.0171269	0.0125449	1.31064	1.31064	-17 days up vs -24 days	5.06587	0.502223	0.247846	1
1155	18135444	NM_001299117 // CG15160 // CG15160 gene product from transcript CG15160-RA // 36F6-36F6	CG15160	NM_001299117	NM_001299117 // GO:0031124 // mRNA 3'-end processing // inferred from sequence or struc	NM_001299117 // GO:0000790 // nuclear chromatin // inferred from sequence or structural	---	0.0413973	0.00339098	1.30947	1.30947	-17 days up vs -24 days	3.73527	0.232762	0.155787	1
2448	18142542	NM_001169438 // Pvr // PDGF- and VEGF-receptor related // 28F4-28F5 // 34127 /// NM_001	Pvr	NM_001169438	NM_001169438 // GO:0000022 // mitotic spindle elongation // inferred from mutant phenot	NM_001169438 // GO:0005886 // plasma membrane // inferred from direct assay /// NM_001	NM_001169438 // GO:0004713 // protein tyrosine kinase activity // non-traceable author	0.0219728	0.00357661	1.30385	1.30385	-17 days up vs -24 days	4.66743	0.286514	0.153465	1
2532	18143081	NM_135595 // CG17108 // CG17108 gene product from transcript CG17108-RA // 32A4-32A4 //	CG17108	NM_135595	---	---	---	0.0405193	0.0129967	1.30285	1.30285	-17 days up vs -24 days	3.76504	0.361923	0.240318	1
569	18132271	NM_135193 // epsilonCOP // Coat Protein (coatomer) epsilon // 26D9-26D9 // 33908 /// FB	epsilonCOP	NM_135193	NM_135193 // GO:0006890 // retrograde vesicle-mediated transport, Golgi to ER // inferr	NM_135193 // GO:0005875 // microtubule associated complex // inferred from direct assay	NM_135193 // GO:0005198 // structural molecule activity // inferred from electronic ann	0.0152869	0.0255537	1.29642	1.29642	-17 days up vs -24 days	5.25404	0.64372	0.306298	1
9611	18183190	NM_001260171 // Set8 // SET domain containing 8 // 88B3-88B3 // 41743 /// NM_142097 //	Set8	NM_001260171	NM_001260171 // GO:0000077 // DNA damage checkpoint // inferred from direct assay ///	NM_001260171 // GO:0005700 // polytene chromosome // inferred from direct assay /// NM	NM_001260171 // GO:0042799 // histone methyltransferase activity (H4-K20 specific) // i	0.0213458	0.00377485	1.29622	1.29622	-17 days up vs -24 days	4.71275	0.281505	0.149332	1
14390	18210388	NM_167539 // TwdlX // TweedleX // 15A3-15A3 // 318094 /// FBtr0074325 // TwdlX // Tweed	TwdlX	NM_167539	NM_167539 // GO:0010171 // body morphogenesis // inferred from sequence or structural s	NM_167539 // GO:0005578 // proteinaceous extracellular matrix // inferred from sequence	NM_167539 // GO:0005214 // structural constituent of chitin-based cuticle // inferred f	0.0577161	0.0060267	1.29114	1.29114	-17 days up vs -24 days	3.2884	0.222752	0.169347	1
13037	18202739	NM_141595 // E(var)3-9 // Enhancer of variegation 3-9 // 85C1-85C1 // 41073 /// FBtr008	E(var)3-9	NM_141595	NM_141595 // GO:0070827 // chromatin maintenance // inferred from mutant phenotype ///	NM_141595 // GO:0005634 // nucleus // inferred from electronic annotation /// FBtr0082	NM_141595 // GO:0003676 // nucleic acid binding // inferred from sequence or structural	0.000368297	2.92e-05	1.2908	1.2908	-17 days up vs -24 days	14.4408	0.226636	0.0392355	1
1836	18138766	NR_073796 // CR43819 // ncRNA // 36B8-36B8 // 14462792 /// NR_124320 // CR43819 // ncRN	CR43819	NR_073796	---	---	---	0.0688946	0.04012	1.2906	1.2906	-17 days up vs -24 days	3.06111	0.447616	0.365567	1
15162	18215031	NM_001298186 // CG1394 // CG1394 gene product from transcript CG1394-RB // 10A10-10A10	CG1394	NM_001298186	---	---	---	0.105839	0.0180123	1.29059	1.29059	-17 days up vs -24 days	2.53844	0.258529	0.254614	1
6755	18167326	NM_001274395 // MsR1 // Myosuppressin receptor 1 // 62D6-62D6 // 38298 /// NM_139456 //	MsR1	NM_001274395	NM_001274395 // GO:0007186 // G-protein coupled receptor signaling pathway // inferred	NM_001274395 // GO:0005887 // integral component of plasma membrane // inferred from di	NM_001274395 // GO:0004930 // G-protein coupled receptor activity // inferred from sequ	0.178822	0.0337523	1.28997	1.28997	-17 days up vs -24 days	1.94853	0.260962	0.33482	1
8340	18176395	NM_139647 // CG11345 // CG11345 gene product from transcript CG11345-RA // 64B6-64B6 //	CG11345	NM_139647	---	---	---	0.0847625	0.0188296	1.28547	1.28547	-17 days up vs -24 days	2.80392	0.281888	0.251333	1
6896	18168214	NM_139870 // CG8541 // CG8541 gene product from transcript CG8541-RA // 66A2-66A2 // 38	CG8541	NM_139870	---	---	NM_139870 // GO:0005214 // structural constituent of chitin-based cuticle // inferred f	0.00440327	0.00745997	1.28003	1.28003	-17 days up vs -24 days	7.61051	0.518516	0.170329	1
4181	18152265	NM_176249 // Obp59a // Odorant-binding protein 59a // 59A3-59A3 // 37605 /// FBtr007187	Obp59a	NM_176249	NM_176249 // GO:0007606 // sensory perception of chemical stimulus // not recorded ///	NM_176249 // GO:0005576 // extracellular region // not recorded /// NM_176249 // GO:00	NM_176249 // GO:0005549 // odorant binding // not recorded /// NM_176249 // GO:0005549	0.0910716	0.0124406	1.27847	1.27847	-17 days up vs -24 days	2.71699	0.22142	0.203737	1
14499	18211113	NM_001103394 // futsch // CG34387 gene product from transcript CG34387-RF // 2A3-2A3 //	futsch	NM_001103394	NM_001103394 // GO:0000226 // microtubule cytoskeleton organization // inferred from mu	NM_001103394 // GO:0005874 // microtubule // inferred from electronic annotation /// N	NM_001103394 // GO:0005515 // protein binding // inferred from physical interaction //	0.280853	0.0402653	1.27637	1.27637	-17 days up vs -24 days	1.47546	0.197757	0.335078	1
14804	18213036	---		---	---	---	---	0.00465889	0.00588458	1.27408	1.27408	-17 days up vs -24 days	7.49082	0.452266	0.15094	1
10757	18189527	NM_144002 // CG14244 // CG14244 gene product from transcript CG14244-RB // 97C5-97C5 //	CG14244	NM_144002	NM_144002 // GO:0006030 // chitin metabolic process // inferred from electronic annotat	NM_144002 // GO:0005576 // extracellular region // inferred from electronic annotation	NM_144002 // GO:0008061 // chitin binding // inferred from electronic annotation /// F	0.0153356	0.0253566	1.27398	1.27398	-17 days up vs -24 days	5.24872	0.557555	0.265567	1
1655	18137890	NM_164906 // Mulk // Multi-substrate lipid kinase // 31D-31D // 326168 /// FBtr0079986	Mulk	NM_164906	NM_164906 // GO:0006672 // ceramide metabolic process // inferred from mutant phenotype	NM_164906 // GO:0005575 // cellular_component // no biological data available /// FBtr	NM_164906 // GO:0001729 // ceramide kinase activity // inferred from direct assay ///	0.0972009	0.0189285	1.27224	1.27224	-17 days up vs -24 days	2.63904	0.244432	0.231554	1
10279	18186859	NM_142417 // CG7794 // CG7794 gene product from transcript CG7794-RA // 90E1-90E1 // 42	CG7794	NM_142417	NM_142417 // GO:0007017 // microtubule-based process // inferred from electronic annota	NM_142417 // GO:0005874 // microtubule // inferred from sequence or structural similari	NM_142417 // GO:0003924 // GTPase activity // inferred from electronic annotation ///	0.134572	0.044531	1.27222	1.27222	-17 days up vs -24 days	2.26221	0.310554	0.343198	1
12127	18197750	NM_142295 // Sdhaf3 // Succinate dehydrogenase assembly factor 3 // 89B18-89B18 // 4200	Sdhaf3	NM_142295	NM_142295 // GO:0006105 // succinate metabolic process // inferred from mutant phenotyp	NM_142295 // GO:0005739 // mitochondrion // inferred from electronic annotation /// NM	---	0.247641	0.0400614	1.27186	1.27186	-17 days up vs -24 days	1.60466	0.208361	0.324618	1
227	18130447	---		---	---	---	---	0.121451	0.0338839	1.27176	1.27176	-17 days up vs -24 days	2.37887	0.284534	0.299022	1
13374	18204951	NR_048530 // CR40629 // ncRNA // --- // 10178881	CR40629	NR_048530	---	---	---	0.00256653	0.00453376	1.27105	1.27105	-17 days up vs -24 days	8.82514	0.478381	0.135516	1
11125	18191714	NM_142730 // lsn // larsen // 93F14-93F14 // 42572 /// FBtr0084135 // lsn // larsen //	lsn	NM_142730	NM_142730 // GO:0008283 // cell proliferation // inferred from mutant phenotype /// NM	NM_142730 // GO:0000814 // ESCRT II complex // inferred from sequence or structural sim	NM_142730 // GO:0003674 // molecular_function // no biological data available /// FBtr	0.00656903	0.00521953	1.26876	1.26876	-17 days up vs -24 days	6.78995	0.380053	0.139932	1
8362	18176467	NM_139704 // CG10635 // CG10635 gene product from transcript CG10635-RA // 64C13-64C14	CG10635	NM_139704	NM_139704 // GO:0006457 // protein folding // inferred from electronic annotation ///	NM_139704 // GO:0016272 // prefoldin complex // inferred from direct assay /// NM_1397	NM_139704 // GO:0051082 // unfolded protein binding // inferred from electronic annotat	0.0142908	0.0154368	1.26637	1.26637	-17 days up vs -24 days	5.36756	0.439993	0.204931	1
899	18134076	NM_135267 // gudu // CG5155 gene product from transcript CG5155-RA // 27F3-27F3 // 3401	gudu	NM_135267	NM_135267 // GO:0007291 // sperm individualization // inferred from mutant phenotype /	NM_135267 // GO:0005575 // cellular_component // no biological data available /// NM_1	NM_135267 // GO:0003674 // molecular_function // no biological data available /// FBtr	0.0224738	0.00252851	1.26393	1.26393	-17 days up vs -24 days	4.6323	0.198603	0.107184	1
1902	18139237	NM_001169541 // l(2)37Cc // lethal (2) 37Cc // 37C1-37C1 // 49168 /// NM_057259 // l(2)	l(2)37Cc	NM_001169541	NM_001169541 // GO:0002165 // instar larval or pupal development // non-traceable autho	NM_001169541 // GO:0005737 // cytoplasm // inferred from direct assay /// NM_001169541	---	0.0694348	0.015012	1.26101	1.26101	-17 days up vs -24 days	3.05124	0.238539	0.195444	1
14831	18213244	NM_001272212 // a6 // CG3771 gene product from transcript CG3771-RC // 2B7-2B7 // 31127	a6	NM_001272212	NM_001272212 // GO:0001700 // embryonic development via the syncytial blastoderm // inf	NM_001272212 // GO:0005575 // cellular_component // no biological data available /// N	NM_001272212 // GO:0005549 // odorant binding // non-traceable author statement /// NM	0.175152	0.0387783	1.25924	1.25924	-17 days up vs -24 days	1.97096	0.23138	0.293487	1
15205	18215257	NM_132582 // CG1824 // CG1824 gene product from transcript CG1824-RA // 11B2-11B2 // 32	CG1824	NM_132582	NM_132582 // GO:0055085 // transmembrane transport // not recorded /// NM_132582 // GO	NM_132582 // GO:0005743 // mitochondrial inner membrane // inferred from sequence or st	NM_132582 // GO:0005215 // transporter activity // inferred from sequence or structural	0.00656433	0.0125724	1.25788	1.25788	-17 days up vs -24 days	6.79137	0.484708	0.178428	1
460	18131551	---		---	---	---	---	0.10683	0.0219431	1.25725	1.25725	-17 days up vs -24 days	2.52752	0.225277	0.222824	1
1982	18139803	---		---	---	---	---	0.10683	0.0219431	1.25725	1.25725	-17 days up vs -24 days	2.52752	0.225277	0.222824	1
6557	18166092	---		---	---	---	---	0.10683	0.0219431	1.25725	1.25725	-17 days up vs -24 days	2.52752	0.225277	0.222824	1
14782	18212971	---		---	---	---	---	0.10683	0.0219431	1.25725	1.25725	-17 days up vs -24 days	2.52752	0.225277	0.222824	1
14783	18212973	---		---	---	---	---	0.10683	0.0219431	1.25725	1.25725	-17 days up vs -24 days	2.52752	0.225277	0.222824	1
1970	18139701	NM_001273389 // Rsf1 // Repressor splicing factor 1 // 31B1-31B1 // 34370 /// NM_057653	Rsf1	NM_001273389	NM_001273389 // GO:0000381 // regulation of alternative mRNA splicing, via spliceosome	NM_001273389 // GO:0005634 // nucleus // inferred from direct assay /// NM_001273389 /	NM_001273389 // GO:0000166 // nucleotide binding // inferred from electronic annotation	0.208089	0.0448703	1.25273	1.25273	-17 days up vs -24 days	1.78658	0.215649	0.301762	1
581	18132352	NM_001298822 // Akap200 // A kinase anchor protein 200 // 29C3-29C4 // 34170 /// NM_001	Akap200	NM_001298822	NM_001298822 // GO:0008104 // protein localization // non-traceable author statement /	NM_001298822 // GO:0005737 // cytoplasm // inferred from direct assay /// NM_001298822	NM_001298822 // GO:0051018 // protein kinase A binding // inferred from physical intera	0.105999	0.0140109	1.25228	1.25228	-17 days up vs -24 days	2.53667	0.18158	0.178955	1
5156	18158063	NM_001274028 // CG6191 // CG6191 gene product from transcript CG6191-RB // 50B3-50B4 //	CG6191	NM_001274028	NM_001274028 // GO:0006909 // phagocytosis // inferred from mutant phenotype /// NM_00	NM_001299460 // GO:0005575 // cellular_component // no biological data available /// F	NM_001274028 // GO:0016740 // transferase activity // inferred from electronic annotati	0.03548	0.0119668	1.2515	1.2515	-17 days up vs -24 days	3.95217	0.264623	0.167391	1
9796	18184371	NM_143742 // TwdlT // TweedleT // 97D14-97D14 // 44790 /// FBtr0085101 // TwdlT // Twee	TwdlT	NM_143742	NM_143742 // GO:0010171 // body morphogenesis // inferred from sequence or structural s	NM_143742 // GO:0005578 // proteinaceous extracellular matrix // inferred from sequence	NM_143742 // GO:0005214 // structural constituent of chitin-based cuticle // inferred f	0.123142	0.0241795	1.25115	1.25115	-17 days up vs -24 days	2.36303	0.210458	0.222657	1
6774	18167434	NM_001169861 // CG2162 // CG2162 gene product from transcript CG2162-RA // 63A3-63A3 //	CG2162	NM_001169861	---	NM_001169861 // GO:0035145 // exon-exon junction complex // --- /// NM_001274420 // GO:	NM_001169861 // GO:0000166 // nucleotide binding // inferred from electronic annotation	0.154481	0.0194398	1.25079	1.25079	-17 days up vs -24 days	2.10827	0.170559	0.20225	1
15474	18216657	NM_001298582 // CG1503 // CG1503 gene product from transcript CG1503-RB // 19F1-19F1 //	CG1503	NM_001298582	NM_001298582 // GO:0006508 // proteolysis // inferred from electronic annotation /// N	---	NM_001298582 // GO:0008234 // cysteine-type peptidase activity // inferred from electro	0.0595986	0.0184244	1.25054	1.25054	-17 days up vs -24 days	3.24665	0.256371	0.197412	1
2657	18143697	NM_001299089 // CG6870 // CG6870 gene product from transcript CG6870-RB // 36D1-36D1 //	CG6870	NM_001299089	---	NM_001299089 // GO:0043231 // intracellular membrane-bounded organelle // inferred from	NM_001299089 // GO:0009055 // electron carrier activity // inferred from sequence or st	0.139542	0.0205624	1.24726	1.24726	-17 days up vs -24 days	2.22142	0.179394	0.201891	1
13634	18206322	---		---	---	---	---	0.0345158	0.00818192	1.2471	1.2471	-17 days up vs -24 days	3.99157	0.224876	0.140844	1
11941	18196655	NM_001260118 // ninaG // CG6728 gene product from transcript CG6728-RB // 86E5-86E5 //	ninaG	NM_001260118	NM_001260118 // GO:0001523 // retinoid metabolic process // inferred from mutant phenot	NM_001260118 // GO:0005575 // cellular_component // no biological data available /// N	NM_001260118 // GO:0016491 // oxidoreductase activity // inferred from mutant phenotype	0.115149	0.0451994	1.24637	1.24637	-17 days up vs -24 days	2.44024	0.28246	0.289378	1
15681	18217767	NM_001038759 // CG34015 // CG34015 gene product from transcript CG34015-RA // 14C6-14C6	CG34015	NM_001038759	NM_001038759 // GO:0008152 // metabolic process // inferred from electronic annotation	NM_001038759 // GO:0005575 // cellular_component // no biological data available /// F	NM_001038759 // GO:0003824 // catalytic activity // inferred from electronic annotation	0.140338	0.0153847	1.24432	1.24432	-17 days up vs -24 days	2.21504	0.155353	0.175339	1
1110	18135226	NM_001273511 // CG44085 // CG44085 gene product from transcript CG44085-RF // 34B3-34B4	CG44085	NM_001273511	---	---	---	0.064037	0.00837254	1.2437	1.2437	-17 days up vs -24 days	3.1541	0.174777	0.138532	1
11587	18194717	NM_001170238 // KrT95D // Krueppel target at 95D // 95D5-95D8 // 42843 /// NM_079749 //	KrT95D	NM_001170238	NM_001170238 // GO:0000042 // protein targeting to Golgi // inferred from sequence or s	NM_001170238 // GO:0005622 // intracellular // --- /// NM_079749 // GO:0005622 // intra	---	0.212672	0.0319035	1.24365	1.24365	-17 days up vs -24 days	1.76358	0.168683	0.239121	1
10577	18188525	NM_143232 // TwdlJ // TweedleJ // 97C2-97C2 // 43206 /// FBtr0114538 // TwdlJ // Tweedl	TwdlJ	NM_143232	NM_143232 // GO:0010171 // body morphogenesis // inferred from sequence or structural s	NM_143232 // GO:0005576 // extracellular region // inferred from direct assay /// NM_1	NM_143232 // GO:0005214 // structural constituent of chitin-based cuticle // inferred f	0.0212413	0.0332655	1.24183	1.24183	-17 days up vs -24 days	4.72047	0.454321	0.240612	1
13200	18203661	NM_001260150 // CG43630 // CG43630 gene product from transcript CG43630-RA // 87C5-87C5	CG43630	NM_001260150	NM_001260150 // GO:0008150 // biological_process // no biological data available /// F	NM_001260150 // GO:0016020 // membrane // inferred from electronic annotation /// NM_0	NM_001260150 // GO:0003674 // molecular_function // no biological data available /// F	0.154522	0.0370127	1.23957	1.23957	-17 days up vs -24 days	2.10798	0.209968	0.249016	1
8175	18175510	NM_080154 // Lk // Leucokinin // 70E2-70E2 // 47746 /// FBtr0075722 // Lk // Leucokinin	Lk	NM_080154	NM_080154 // GO:0007204 // positive regulation of cytosolic calcium ion concentration /	NM_080154 // GO:0005615 // extracellular space // not recorded /// NM_080154 // GO:000	NM_080154 // GO:0005179 // hormone activity // non-traceable author statement /// NM_0	0.0541354	0.014211	1.23733	1.23733	-17 days up vs -24 days	3.37243	0.217519	0.161249	1
15820	18218532	NM_001201649 // CG44422 // CG44422 gene product from transcript CG44422-RD // 10B2-10B2	CG44422	NM_001201649	---	---	NM_001201649 // GO:0005509 // calcium ion binding // inferred from sequence or structur	0.102796	0.032003	1.23631	1.23631	-17 days up vs -24 days	2.57275	0.233226	0.226631	1
8922	18179432	NM_141100 // CG14567 // CG14567 gene product from transcript CG14567-RA // 78E6-78E6 //	CG14567	NM_141100	---	---	---	0.054646	0.00944644	1.23537	1.23537	-17 days up vs -24 days	3.36005	0.182759	0.135979	1
5905	18162378	NM_001273950 // luna // CG33473 gene product from transcript CG33473-RC // 47D1-47D4 //	luna	NM_001273950	NM_001273950 // GO:0000070 // mitotic sister chromatid segregation // inferred from mut	NM_001273950 // GO:0005634 // nucleus // inferred by curator /// NM_001273950 // GO:00	NM_001273950 // GO:0003677 // DNA binding // inferred from sequence or structural simil	0.155961	0.0419138	1.23441	1.23441	-17 days up vs -24 days	2.09775	0.213652	0.254619	1
8304	18176177	NM_139547 // PIG-C // Phosphatidylinositol glycan anchor biosynthesis, class C ortholog	PIG-C	NM_139547	NM_139547 // GO:0006506 // GPI anchor biosynthetic process // inferred from electronic	NM_139547 // GO:0016021 // integral component of membrane // inferred from electronic a	NM_139547 // GO:0017176 // phosphatidylinositol N-acetylglucosaminyltransferase activit	0.107369	0.0325295	1.23427	1.23427	-17 days up vs -24 days	2.52162	0.226779	0.224834	1
5107	18157734	NM_001299567 // Picot // CG8098 gene product from transcript CG8098-RA // 53C15-53D1 //	Picot	NM_001299567	NM_001299567 // GO:0006817 // phosphate ion transport // non-traceable author statement	NM_001299567 // GO:0016021 // integral component of membrane // inferred from electroni	NM_001299567 // GO:0005316 // high-affinity inorganic phosphate:sodium symporter activi	0.0279954	0.0475389	1.23298	1.23298	-17 days up vs -24 days	4.29776	0.461788	0.268622	1
5292	18159024	NM_001103762 // CG14744 // CG14744 gene product from transcript CG14744-RD // 44E2-44E2	CG14744	NM_001103762	NM_001103762 // GO:0055085 // transmembrane transport // inferred from electronic annot	NM_001103762 // GO:0016021 // integral component of membrane // inferred from electroni	---	0.0084525	0.00231141	1.23158	1.23158	-17 days up vs -24 days	6.30486	0.207947	0.0824549	1
15143	18214935	NM_132401 // CG12640 // CG12640 gene product from transcript CG12640-RA // 9C2-9C2 // 3	CG12640	NM_132401	---	---	---	0.00788181	0.0426904	1.23122	1.23122	-17 days up vs -24 days	6.43699	0.64556	0.250723	1
15334	18215923	NM_132933 // CG9609 // CG9609 gene product from transcript CG9609-RA // 15A8-15A8 // 32	CG9609	NM_132933	---	NM_132933 // GO:0005634 // nucleus // inferred from sequence or structural similarity	NM_132933 // GO:0003676 // nucleic acid binding // inferred from electronic annotation	0.043271	0.0323581	1.23101	1.23101	-17 days up vs -24 days	3.67415	0.321399	0.218689	1
8156	18175380	NM_001274408 // Aats-pro // Prolyl-tRNA synthetase // 62E8-62E8 // 38331 /// NM_139480	Aats-pro	NM_001274408	NM_001274408 // GO:0006426 // glycyl-tRNA aminoacylation // inferred from electronic an	NM_001274408 // GO:0005737 // cytoplasm // inferred from electronic annotation /// NM_	NM_001274408 // GO:0004820 // glycine-tRNA ligase activity // inferred from electronic	0.005963	0.00165279	1.23049	1.23049	-17 days up vs -24 days	6.98265	0.206333	0.0738736	1
1616	18137638	NM_001273589 // CG13272 // CG13272 gene product from transcript CG13272-RB // 36B1-36B1	CG13272	NM_001273589	NM_001273589 // GO:0008150 // biological_process // no biological data available /// N	NM_001273589 // GO:0005575 // cellular_component // no biological data available /// N	NM_001273589 // GO:0003674 // molecular_function // no biological data available /// N	0.0518245	0.0185881	1.23027	1.23027	-17 days up vs -24 days	3.43022	0.233573	0.170232	1
4751	18155225	NM_001014502 // scra // scraps // 43E4-43E6 // 35696 /// NM_165543 // scra // scraps //	scra	NM_001014502	NM_001014502 // GO:0000281 // mitotic cytokinesis // inferred from mutant phenotype //	NM_001014502 // GO:0005634 // nucleus // inferred from direct assay /// NM_001014502 /	NM_001014502 // GO:0003779 // actin binding // inferred from direct assay /// NM_00101	0.0989772	0.0318078	1.22837	1.22837	-17 days up vs -24 days	2.61752	0.222461	0.212473	1
825	18133688	NM_135042 // CG14043 // CG14043 gene product from transcript CG14043-RA // 25B5-25B5 //	CG14043	NM_135042	NM_135042 // GO:0006839 // mitochondrial transport // inferred from sequence or structu	NM_135042 // GO:0005739 // mitochondrion // inferred from sequence or structural simila	NM_135042 // GO:0003674 // molecular_function // no biological data available /// NM_1	0.1256	0.0217086	1.22784	1.22784	-17 days up vs -24 days	2.34046	0.166936	0.178315	1
6001	18162864	NM_166461 // CG30287 // CG30287 gene product from transcript CG30287-RA // 57E10-57E11	CG30287	NM_166461	NM_166461 // GO:0006508 // proteolysis // inferred from electronic annotation /// NM_1	NM_166461 // GO:0005615 // extracellular space // --- /// FBtr0071695 // GO:0005615 //	NM_166461 // GO:0004252 // serine-type endopeptidase activity // inferred from electron	0.00361438	0.000686156	1.22597	1.22597	-17 days up vs -24 days	8.03986	0.178231	0.0554212	1
9894	18184905	NM_141429 // djl // don juan like // 84B2-84B2 // 40839 /// FBtr0081631 // djl // don j	djl	NM_141429	NM_141429 // GO:0008150 // biological_process // no biological data available /// FBtr	NM_141429 // GO:0005634 // nucleus // inferred from direct assay /// NM_141429 // GO:0	NM_141429 // GO:0003674 // molecular_function // no biological data available /// FBtr	0.00098408	0.000736243	1.22586	1.22586	-17 days up vs -24 days	11.3287	0.255867	0.0564644	1
10059	18185720	NM_141823 // dpr5 // defective proboscis extension response 5 // 86E7-86E8 // 41381 ///	dpr5	NM_141823	NM_141823 // GO:0007606 // sensory perception of chemical stimulus // inferred from seq	NM_141823 // GO:0005575 // cellular_component // no biological data available /// NM_1	NM_141823 // GO:0003674 // molecular_function // no biological data available /// NM_1	0.182805	0.0279185	1.2249	1.2249	-17 days up vs -24 days	1.92478	0.149836	0.194615	1
15853	18218653	NM_001258613 // CG43115 // CG43115 gene product from transcript CG43115-RA // 5D3-5D3 /	CG43115	NM_001258613	NM_001258613 // GO:0008150 // biological_process // no biological data available /// F	NM_001258613 // GO:0005575 // cellular_component // no biological data available /// N	NM_001258613 // GO:0003674 // molecular_function // no biological data available /// F	0.063149	0.0368233	1.22462	1.22462	-17 days up vs -24 days	3.172	0.280542	0.221108	1
267	18130527	---		---	---	---	---	0.0203111	0.0283354	1.22442	1.22442	-17 days up vs -24 days	4.79114	0.374018	0.195161	1
9916	18185018	NM_001275422 // CG10092 // CG10092 gene product from transcript CG10092-RB // 84E4-84E4	CG10092	NM_001275422	NM_001275422 // GO:0006420 // arginyl-tRNA aminoacylation // inferred from electronic a	NM_001275422 // GO:0005739 // mitochondrion // inferred from direct assay /// NM_00127	NM_001275422 // GO:0004814 // arginine-tRNA ligase activity // inferred from sequence o	0.152487	0.0194306	1.22376	1.22376	-17 days up vs -24 days	2.12262	0.139798	0.164653	1
11257	18192510	NR_048470 // CR43454 // ncRNA // 94D7-94D7 // 12798520	CR43454	NR_048470	---	---	---	0.112234	0.0215523	1.22331	1.22331	-17 days up vs -24 days	2.46996	0.169355	0.171415	1
6497	18165669	NM_057507 // GluRIA // Glutamate receptor IA // 65C1-65C1 // 38742 /// FBtr0076982 // G	GluRIA	NM_057507	NM_057507 // GO:0006812 // cation transport // inferred from direct assay /// NM_05750	NM_057507 // GO:0008328 // ionotropic glutamate receptor complex // inferred by curator	NM_057507 // GO:0005234 // extracellular-glutamate-gated ion channel activity // inferr	0.147542	0.0460731	1.22318	1.22318	-17 days up vs -24 days	2.15918	0.211189	0.244525	1
4285	18152861	NM_138117 // spz6 // spatzle 6 // 60E1-60E1 // 37956 /// FBtr0072370 // spz6 // spatzle	spz6	NM_138117	NM_138117 // GO:0008063 // Toll signaling pathway // inferred from sequence or structur	NM_138117 // GO:0005576 // extracellular region // inferred from sequence or structural	NM_138117 // GO:0005121 // Toll binding // inferred from sequence or structural similar	0.168386	0.021655	1.22175	1.22175	-17 days up vs -24 days	2.01375	0.136608	0.169594	1
11086	18191434	NM_001144589 // CG42342 // CG42342 gene product from transcript CG42342-RH // 89B20-89B	CG42342	NM_001144589	NM_001144589 // GO:0008150 // biological_process // no biological data available /// N	NM_001144589 // GO:0005575 // cellular_component // no biological data available /// N	NM_001144589 // GO:0003674 // molecular_function // no biological data available /// N	0.0514894	0.00598537	1.22121	1.22121	-17 days up vs -24 days	3.43886	0.142151	0.103342	1
4251	18152658	NM_001299893 // CG16786 // CG16786 gene product from transcript CG16786-RC // 60B8-60B9	CG16786	NM_001299893	---	---	---	0.161383	0.0482003	1.22114	1.22114	-17 days up vs -24 days	2.06018	0.202897	0.246212	1
1336	18136505	NM_001298763 // sens-2 // senseless-2 // 27B4-27B4 // 33957 /// NM_164716 // sens-2 //	sens-2	NM_001298763	---	NM_001298763 // GO:0005634 // nucleus // inferred from sequence or structural similarit	NM_001298763 // GO:0003676 // nucleic acid binding // inferred from sequence or structu	0.00488329	0.00676162	1.22085	1.22085	-17 days up vs -24 days	7.39205	0.317823	0.107488	1
14839	18213301	NM_001297866 // Pgam5 // Phosphoglycerate mutase 5 // 2B13-2B13 // 31143 /// NM_130595	Pgam5	NM_001297866	NM_001297866 // GO:0009408 // response to heat // inferred from mutant phenotype /// N	NM_001297866 // GO:0005739 // mitochondrion // inferred from sequence or structural sim	NM_001297866 // GO:0004619 // phosphoglycerate mutase activity // inferred from direct	3.8e-05	0.000951174	1.22011	1.22011	-17 days up vs -24 days	24.4522	0.566295	0.0578983	1
13421	18205063	---		---	---	---	---	0.0537145	0.0195588	1.21927	1.21927	-17 days up vs -24 days	3.38273	0.215339	0.159146	1
6366	18164950	NR_048091 // scaRNA:PsiU2-55 // small Cajal body-specific RNA : PsiU2-55 // 48E4-48E4 /	scaRNA:PsiU2-55	NR_048091	---	NR_048091 // GO:0015030 // Cajal body // inferred from direct assay /// NR_133112 // G	NR_048091 // GO:0030559 // rRNA pseudouridylation guide activity // inferred from direc	0.0458676	0.0219946	1.21887	1.21887	-17 days up vs -24 days	3.59446	0.239728	0.166735	1
9478	18182313	NM_079850 // CecA2 // Cecropin A2 // 99E2-99E2 // 43597	CecA2	NM_079850	NM_079850 // GO:0006959 // humoral immune response // inferred from expression pattern	NM_079850 // GO:0005615 // extracellular space // inferred from direct assay /// NM_07	NM_079850 // GO:0003674 // molecular_function // no biological data available /// FBtr	0.0102938	0.00101735	1.21546	1.21546	-17 days up vs -24 days	5.94188	0.134932	0.0567717	1
15427	18216426	NM_001258828 // CG14218 // CG14218 gene product from transcript CG14218-RC // 18D3-18D3	CG14218	NM_001258828	NM_001258828 // GO:0006508 // proteolysis // not recorded /// NM_001258828 // GO:00065	---	NM_001258828 // GO:0004252 // serine-type endopeptidase activity // not recorded /// N	0.153107	0.0179513	1.21542	1.21542	-17 days up vs -24 days	2.11814	0.125997	0.148712	1
14314	18210013	NM_001298570 // Cyp6v1 // CG1829 gene product from transcript CG1829-RB // 19E1-19E1 //	Cyp6v1	NM_001298570	NM_001298570 // GO:0055114 // oxidation-reduction process // inferred from electronic a	NM_001298570 // GO:0016020 // membrane // non-traceable author statement /// NM_001298	NM_001298570 // GO:0005506 // iron ion binding // inferred from electronic annotation	0.148369	0.0301017	1.21485	1.21485	-17 days up vs -24 days	2.15296	0.15967	0.185408	1
6792	18167590	NM_139546 // Drsl5 // Drosomycin-like 5 // 63D1-63D1 // 38409 /// FBtr0073062 // Drsl5	Drsl5	NM_139546	NM_139546 // GO:0006952 // defense response // non-traceable author statement /// NM_1	NM_139546 // GO:0005576 // extracellular region // not recorded /// NM_139546 // GO:00	NM_139546 // GO:0003674 // molecular_function // no biological data available /// FBtr	0.147816	0.0280057	1.21458	1.21458	-17 days up vs -24 days	2.15712	0.154422	0.178968	1
15021	18214391	NM_132031 // CG3097 // CG3097 gene product from transcript CG3097-RA // 5B8-5C2 // 3150	CG3097	NM_132031	NM_132031 // GO:0006508 // proteolysis // inferred from electronic annotation /// FBtr	---	NM_132031 // GO:0004181 // metallocarboxypeptidase activity // inferred from sequence o	0.103971	0.0431407	1.21452	1.21452	-17 days up vs -24 days	2.55936	0.225279	0.220054	1
3587	18148977	NM_143757 // Prosbeta5 // Proteasome beta5 subunit // 47C1-47C1 // 45269 /// NM_165801	Prosbeta5	NM_143757	NM_143757 // GO:0000022 // mitotic spindle elongation // inferred from mutant phenotype	NM_143757 // GO:0000502 // proteasome complex // inferred from direct assay /// NM_143	NM_143757 // GO:0004175 // endopeptidase activity // inferred by curator /// NM_143757	0.0312811	0.00298709	1.21047	1.21047	-17 days up vs -24 days	4.13397	0.124176	0.075095	1
9814	18184499	NM_141216 // CG14650 // CG14650 gene product from transcript CG14650-RA // 82B1-82B1 //	CG14650	NM_141216	NM_141216 // GO:0009408 // response to heat // inferred from sequence or structural sim	---	---	0.0111504	0.00278404	1.2101	1.2101	-17 days up vs -24 days	5.79856	0.169825	0.0732187	1
12253	18198436	NM_142611 // CG17199 // CG17199 gene product from transcript CG17199-RA // 92D5-92D5 //	CG17199	NM_142611	NM_142611 // GO:0055114 // oxidation-reduction process // inferred from electronic anno	---	NM_142611 // GO:0016491 // oxidoreductase activity // inferred from electronic annotati	0.140808	0.03647	1.21006	1.21006	-17 days up vs -24 days	2.2113	0.172359	0.194862	1
8708	18178275	NM_140608 // CG4962 // CG4962 gene product from transcript CG4962-RA // 72E1-72E1 // 39	CG4962	NM_140608	---	---	---	0.0278128	0.024755	1.20958	1.20958	-17 days up vs -24 days	4.30752	0.279526	0.162231	1
9198	18180697	NM_001104149 // CG34248 // CG34248 gene product from transcript CG34248-RB // 72D10-72D	CG34248	NM_001104149	NM_001104149 // GO:0008150 // biological_process // no biological data available /// N	NM_001104149 // GO:0005575 // cellular_component // no biological data available /// N	NM_001104149 // GO:0003674 // molecular_function // no biological data available /// N	0.0213929	0.00322524	1.20846	1.20846	-17 days up vs -24 days	4.70929	0.142427	0.0756094	1
3285	18146863	NR_073776 // CR43856 // ncRNA // 35B8-35B8 // 14462767	CR43856	NR_073776	---	---	---	0.0300554	0.00245748	1.2082	1.2082	-17 days up vs -24 days	4.19257	0.11617	0.0692716	1
14469	18210842	NM_001042801 // RhoU // CG34104 gene product from transcript CG34104-RB // 9B1-9B2 // 3	RhoU	NM_001042801	NM_001042801 // GO:0007264 // small GTPase mediated signal transduction // inferred fro	NM_001042801 // GO:0005622 // intracellular // inferred from electronic annotation ///	NM_001042801 // GO:0003924 // GTPase activity // inferred from sequence or structural s	0.219342	0.0452472	1.20781	1.20781	-17 days up vs -24 days	1.73109	0.147347	0.212795	1
10288	18186890	NM_142441 // CG18598 // CG18598 gene product from transcript CG18598-RA // 90F10-90F10	CG18598	NM_142441	---	---	---	0.00949175	0.00401292	1.20753	1.20753	-17 days up vs -24 days	6.0896	0.196022	0.080474	1
6928	18168391	NM_139963 // CG13667 // CG13667 gene product from transcript CG13667-RB // 66C11-66C11	CG13667	NM_139963	NM_139963 // GO:0055114 // oxidation-reduction process // inferred from electronic anno	NM_139963 // GO:0005829 // cytosol // not recorded /// NM_139963 // GO:0005737 // cyto	NM_139963 // GO:0003958 // NADPH-hemoprotein reductase activity // not recorded /// NM	0.0693406	0.0252432	1.2073	1.2073	-17 days up vs -24 days	3.05296	0.195901	0.160419	1
7934	18173880	NM_001300071 // Hsp26 // Heat shock protein 26 // 67B2-67B2 // 39075 /// NM_079273 // H	Hsp26	NM_001300071	NM_001300071 // GO:0008340 // determination of adult lifespan // inferred from mutant p	NM_001300071 // GO:0005737 // cytoplasm // inferred from direct assay /// NM_001300071	NM_001300071 // GO:0017022 // myosin binding // inferred from physical interaction ///	0.240892	0.0363658	1.20653	1.20653	-17 days up vs -24 days	1.63329	0.123268	0.188681	1
15123	18214831	NM_132309 // CG12118 // CG12118 gene product from transcript CG12118-RB // 8D1-8D1 // 3	CG12118	NM_132309	NM_132309 // GO:0009235 // cobalamin metabolic process // inferred from electronic anno	NM_132309 // GO:0005575 // cellular_component // no biological data available	NM_132309 // GO:0003674 // molecular_function // no biological data available	0.0171482	0.00205277	1.20604	1.20604	-17 days up vs -24 days	5.06384	0.130283	0.06432	1
13897	18207818	NM_132085 // CG3823 // CG3823 gene product from transcript CG3823-RA // 5E7-5E8 // 3157	CG3823	NM_132085	NM_132085 // GO:0006810 // transport // inferred from electronic annotation /// FBtr00	NM_132085 // GO:0005622 // intracellular // inferred from electronic annotation /// FB	NM_132085 // GO:0005215 // transporter activity // inferred from electronic annotation	0.103674	0.0164961	1.20497	1.20497	-17 days up vs -24 days	2.56273	0.134506	0.131213	1
13868	18207654	NM_001297980 // CG15771 // CG15771 gene product from transcript CG15771-RD // 5B8-5B8 /	CG15771	NM_001297980	NM_001297980 // GO:0008152 // metabolic process // inferred from electronic annotation	---	NM_001297980 // GO:0016787 // hydrolase activity // inferred from electronic annotation	0.0198392	0.0026583	1.20407	1.20407	-17 days up vs -24 days	4.82849	0.132179	0.0684372	1
6897	18168216	NM_176295 // mthl6 // methuselah-like 6 // 66A2-66A2 // 38839 /// FBtr0076789 // mthl6	mthl6	NM_176295	NM_176295 // GO:0007166 // cell surface receptor signaling pathway // inferred from ele	NM_176295 // GO:0016021 // integral component of membrane // inferred from sequence or	NM_176295 // GO:0004930 // G-protein coupled receptor activity // inferred from sequenc	0.0422927	0.0070783	1.20314	1.20314	-17 days up vs -24 days	3.70566	0.139066	0.0938201	1
2255	18141398	NM_078739 // Prx6005 // Peroxiredoxin 6005 // 23C1-23C1 // 33493 /// FBtr0077684 // Prx	Prx6005	NM_078739	NM_078739 // GO:0042744 // hydrogen peroxide catabolic process // inferred from direct	NM_078739 // GO:0005829 // cytosol // inferred from direct assay /// FBtr0077684 // GO	NM_078739 // GO:0004601 // peroxidase activity // non-traceable author statement /// N	0.181529	0.0327664	1.20224	1.20224	-17 days up vs -24 days	1.93232	0.133537	0.172768	1
5606	18160789	NM_137390 // CG6484 // CG6484 gene product from transcript CG6484-RA // 54C10-54C10 //	CG6484	NM_137390	NM_137390 // GO:0055085 // transmembrane transport // inferred from electronic annotati	NM_137390 // GO:0016021 // integral component of membrane // inferred from electronic a	NM_137390 // GO:0005355 // glucose transmembrane transporter activity // inferred from	0.0211999	0.00741532	1.20202	1.20202	-17 days up vs -24 days	4.72353	0.178393	0.0944172	1
3390	18147662	NM_078989 // Lac // Lachesin // 49A6-49A7 // 36363 /// FBtr0087933 // Lac // Lachesin /	Lac	NM_078989	NM_078989 // GO:0007156 // homophilic cell adhesion via plasma membrane adhesion molecu	NM_078989 // GO:0005886 // plasma membrane // inferred from direct assay /// NM_078989	NM_078989 // GO:0042803 // protein homodimerization activity // inferred from direct as	0.188614	0.0412089	1.2015	1.2015	-17 days up vs -24 days	1.89117	0.145113	0.19183	1
9557	18182809	NM_079709 // tin // tinman // 93D9-93D9 // 42536 /// FBtr0084086 // tin // tinman // 93	tin	NM_079709	NM_079709 // GO:0001708 // cell fate specification // non-traceable author statement /	NM_079709 // GO:0005634 // nucleus // inferred from direct assay /// NM_079709 // GO:0	NM_079709 // GO:0000980 // RNA polymerase II distal enhancer sequence-specific DNA bind	0.0751172	0.0300554	1.19978	1.19978	-17 days up vs -24 days	2.95267	0.191649	0.162267	1
7218	18169840	NM_001275071 // CG7430 // CG7430 gene product from transcript CG7430-RA // 75A4-75A4 //	CG7430	NM_001275071	NM_001275071 // GO:0006099 // tricarboxylic acid cycle // inferred from sequence or str	NM_001275071 // GO:0005811 // lipid particle // inferred from direct assay /// NM_0012	NM_001275071 // GO:0004148 // dihydrolipoyl dehydrogenase activity // inferred from seq	0.0417783	0.00987392	1.19974	1.19974	-17 days up vs -24 days	3.72258	0.152759	0.10259	1
12453	18199559	NM_001170260 // Npl4 // Npl4 ortholog // 96E4-96E6 // 43091 /// NM_143150 // Npl4 // Np	Npl4	NM_001170260	NM_001170260 // GO:0006511 // ubiquitin-dependent protein catabolic process // inferred	NM_001170260 // GO:0005643 // nuclear pore // inferred from sequence or structural simi	NM_001170260 // GO:0008270 // zinc ion binding // inferred from electronic annotation	0.127009	0.0247729	1.1995	1.1995	-17 days up vs -24 days	2.32774	0.138103	0.148323	1
6461	18165462	NM_001259868 // l(3)73Ah // lethal (3) 73Ah // 73A10-73A10 // 48903 /// NM_080194 // l(	l(3)73Ah	NM_001259868	NM_001259868 // GO:0008150 // biological_process // no biological data available /// N	NM_001259868 // GO:0005634 // nucleus // inferred from sequence or structural similarit	NM_001259868 // GO:0008270 // zinc ion binding // inferred from electronic annotation	0.120024	0.0356116	1.19917	1.19917	-17 days up vs -24 days	2.39244	0.167284	0.174805	1
3868	18150581	NM_137079 // CG18371 // CG18371 gene product from transcript CG18371-RA // 50D2-50D2 //	CG18371	NM_137079	NM_137079 // GO:0008152 // metabolic process // inferred from electronic annotation //	---	NM_137079 // GO:0003998 // acylphosphatase activity // inferred from electronic annotat	0.132463	0.0355701	1.19874	1.19874	-17 days up vs -24 days	2.28004	0.158701	0.174011	1
11036	18191100	NM_001104514 // CG34433 // CG34433 gene product from transcript CG34433-RA // 100A1-100	CG34433	NM_001104514	NM_001104514 // GO:0008150 // biological_process // no biological data available /// N	NM_001104514 // GO:0005575 // cellular_component // no biological data available /// N	NM_001104514 // GO:0003674 // molecular_function // no biological data available /// N	0.147163	0.0437471	1.19852	1.19852	-17 days up vs -24 days	2.16203	0.16639	0.1924	1
14748	18212788	NM_001298141 // Yp2 // Yolk protein 2 // 9A5-9A5|1-30 cM // 31938 /// NM_078547 // Yp2	Yp2	NM_001298141	NM_001298141 // GO:0007296 // vitellogenesis // non-traceable author statement /// NM_	NM_001298141 // GO:0005811 // lipid particle // inferred from direct assay /// NM_0012	NM_001298141 // GO:0005198 // structural molecule activity // inferred from sequence or	0.0999889	0.0198702	1.19807	1.19807	-17 days up vs -24 days	2.60547	0.138726	0.13311	1
4839	18155829	NR_048144 // CR43399 // ncRNA // 56B7-56B7 // 12798344	CR43399	NR_048144	---	---	---	0.20446	0.0377827	1.19716	1.19716	-17 days up vs -24 days	1.8052	0.12751	0.176587	1
5868	18162151	NM_001038882 // CG4622 // CG4622 gene product from transcript CG4622-RC // 60D4-60D5 //	CG4622	NM_001038882	NM_001038882 // GO:0008150 // biological_process // no biological data available /// N	NM_001038882 // GO:0005575 // cellular_component // no biological data available /// N	NM_001038882 // GO:0003676 // nucleic acid binding // inferred from electronic annotati	0.1222	0.0321277	1.19676	1.19676	-17 days up vs -24 days	2.37182	0.154445	0.162792	1
4382	18153402	NM_165914 // CG30056 // CG30056 gene product from transcript CG30056-RA // 49B3-49B3 //	CG30056	NM_165914	NM_165914 // GO:0007411 // axon guidance // inferred from genetic interaction /// NM_1	NM_165914 // GO:0005886 // plasma membrane // inferred from direct assay /// NM_165914	NM_165914 // GO:0005042 // netrin receptor activity // traceable author statement ///	0.121881	0.0455575	1.19674	1.19674	-17 days up vs -24 days	2.37482	0.183549	0.193224	1
829	18133703	NM_001038785 // CG44001 // CG44001 gene product from transcript CG44001-RA // 25C1-25C1	CG44001	NM_001038785	NM_001038785 // GO:0008150 // biological_process // no biological data available /// N	NM_001038785 // GO:0005575 // cellular_component // no biological data available /// N	NM_001038785 // GO:0003674 // molecular_function // no biological data available /// N	0.0221874	0.00988818	1.19661	1.19661	-17 days up vs -24 days	4.65226	0.185585	0.0997285	1
15886	18218907	NM_001038743 // Vsx2 // Visual system homeobox 2 ortholog // 5A3-5A6 // 31469 /// NM_00	Vsx2	NM_001038743	NM_001038743 // GO:0000122 // negative regulation of transcription from RNA polymerase	NM_001038743 // GO:0005634 // nucleus // inferred from sequence or structural similarit	NM_001038743 // GO:0003700 // transcription factor activity, sequence-specific DNA bind	0.0860962	0.02069	1.1964	1.1964	-17 days up vs -24 days	2.78493	0.148526	0.13333	1
13637	18206328	---		---	---	---	---	0.173622	0.043626	1.19613	1.19613	-17 days up vs -24 days	1.98047	0.148863	0.187914	1
14781	18212969	---		---	---	---	---	0.173622	0.043626	1.19613	1.19613	-17 days up vs -24 days	1.98047	0.148863	0.187914	1
12189	18198065	NM_142451 // CG18600 // CG18600 gene product from transcript CG18600-RA // 91A2-91A2 //	CG18600	NM_142451	NM_142451 // GO:0006351 // transcription, DNA-templated // inferred from electronic ann	NM_142451 // GO:0005634 // nucleus // inferred from electronic annotation /// NM_14245	NM_142451 // GO:0003677 // DNA binding // inferred from electronic annotation /// NM_1	0.115954	0.0166863	1.19521	1.19521	-17 days up vs -24 days	2.43218	0.117313	0.120584	1
9601	18183142	NM_001300424 // Akt1 // CG4006 gene product from transcript CG4006-RE // 89B3-89B3 // 4	Akt1	NM_001300424	NM_001300424 // GO:0006468 // protein phosphorylation // inferred from direct assay //	NM_001300424 // GO:0005737 // cytoplasm // inferred from direct assay /// NM_001300424	NM_001300424 // GO:0004672 // protein kinase activity // inferred from direct assay //	0.221607	0.0492025	1.195	1.195	-17 days up vs -24 days	1.72031	0.136167	0.197882	1
5450	18159991	NM_001169662 // CG44250 // CG44250 gene product from transcript CG44250-RB // 49E4-49E4	CG44250	NM_001169662	NM_001169662 // GO:0008150 // biological_process // no biological data available /// N	NM_001169662 // GO:0005575 // cellular_component // no biological data available /// N	NM_001169662 // GO:0003674 // molecular_function // no biological data available /// N	0.103646	0.0260869	1.19421	1.19421	-17 days up vs -24 days	2.56305	0.148136	0.144492	1
1967	18139685	NM_001169527 // Dif // Dorsal-related immunity factor // 36C7-36C8 // 35045 /// NM_0011	Dif	NM_001169527	NM_001169527 // GO:0002781 // antifungal peptide production // inferred from mutant phe	NM_001169527 // GO:0005634 // nucleus // inferred from direct assay /// NM_001169527 /	NM_001169527 // GO:0001077 // transcriptional activator activity, RNA polymerase II cor	0.050786	0.0135615	1.19419	1.19419	-17 days up vs -24 days	3.4572	0.152041	0.109945	1
6171	18163775	NM_001103749 // Dgk // Diacyl glycerol kinase // 43E18-43F1 // 35738 /// NM_001103750 /	Dgk	NM_001103749	NM_001103749 // GO:0006661 // phosphatidylinositol biosynthetic process // non-traceabl	NM_001103749 // GO:0005575 // cellular_component // no biological data available /// N	NM_001103749 // GO:0004143 // diacylglycerol kinase activity // inferred from direct as	0.0056597	0.0307097	1.19335	1.19335	-17 days up vs -24 days	7.0881	0.437657	0.154363	1
11943	18196667	NM_001260119 // CG6744 // CG6744 gene product from transcript CG6744-RA // 86E5-86E5 //	CG6744	NM_001260119	NM_001260119 // GO:0016444 // somatic cell DNA recombination // inferred from mutant ph	NM_001260119 // GO:0005634 // nucleus // --- /// NM_001260119 // GO:0005737 // cytoplas	NM_001260119 // GO:0003676 // nucleic acid binding // inferred from electronic annotati	0.0505927	0.0405824	1.19254	1.19254	-17 days up vs -24 days	3.46229	0.242589	0.175165	1
14446	18210726	NM_001298334 // CG33178 // CG33178 gene product from transcript CG33178-RC // 13A9-13A9	CG33178	NM_001298334	NM_001298334 // GO:0006749 // glutathione metabolic process // inferred from sequence o	NM_001298334 // GO:0005739 // mitochondrion // inferred from sequence or structural sim	NM_001298334 // GO:0004364 // glutathione transferase activity // inferred from sequenc	0.0116758	0.00405365	1.19225	1.19225	-17 days up vs -24 days	5.71702	0.160552	0.070208	1
11778	18195718	NM_001275376 // Osi4 // Osiris 4 // 83E1-83E1 // 40758 /// NM_141366 // Osi4 // Osiris	Osi4	NM_001275376	NM_001275376 // GO:0008150 // biological_process // no biological data available /// N	NM_001275376 // GO:0005887 // integral component of plasma membrane // not recorded //	NM_001275376 // GO:0003674 // molecular_function // no biological data available /// N	0.0262819	0.00271999	1.19147	1.19147	-17 days up vs -24 days	4.39251	0.107774	0.0613399	1
13761	18207138	NM_132838 // Tcp-1zeta // T-cp1zeta // 13E13-13E14 // 32518 /// FBtr0074086 // Tcp-1zet	Tcp-1zeta	NM_132838	NM_132838 // GO:0006457 // protein folding // inferred from sequence or structural simi	NM_132838 // GO:0005811 // lipid particle // inferred from direct assay /// NM_132838	NM_132838 // GO:0005524 // ATP binding // inferred from electronic annotation /// NM_1	0.0406087	0.0271666	1.19144	1.19144	-17 days up vs -24 days	3.76197	0.215655	0.143312	1
7426	18170912	NM_001275028 // CG32164 // CG32164 gene product from transcript CG32164-RB // 73B1-73B1	CG32164	NM_001275028	NM_001275028 // GO:0006886 // intracellular protein transport // inferred from electron	NM_001275028 // GO:0005737 // cytoplasm // --- /// NM_001275028 // GO:0031965 // nuclea	NM_001275028 // GO:0008536 // Ran GTPase binding // inferred from electronic annotation	0.0401664	0.0150132	1.19134	1.19134	-17 days up vs -24 days	3.77722	0.168294	0.111388	1
10553	18188414	NM_001170265 // CG5024 // CG5024 gene product from transcript CG5024-RA // 96F3-96F3 //	CG5024	NM_001170265	---	---	NM_001170265 // GO:0005509 // calcium ion binding // inferred from sequence or structur	0.183695	0.0366742	1.19053	1.19053	-17 days up vs -24 days	1.91954	0.12552	0.163476	1
9654	18183501	NM_080484 // Glut3 // Glucose transporter type 3 // 89E1-89E1 // 42036 /// FBtr0083340	Glut3	NM_080484	NM_080484 // GO:0015758 // glucose transport // non-traceable author statement /// NM_	NM_080484 // GO:0016021 // integral component of membrane // inferred from electronic a	NM_080484 // GO:0005355 // glucose transmembrane transporter activity // inferred from	0.0780863	0.0254772	1.18982	1.18982	-17 days up vs -24 days	2.9046	0.159291	0.137103	1
9714	18183833	NM_001144658 // Ptx1 // CG1447 gene product from transcript CG1447-RC // 100A7-100B1 //	Ptx1	NM_001144658	NM_001144658 // GO:0006357 // regulation of transcription from RNA polymerase II promot	NM_001144658 // GO:0005634 // nucleus // inferred from direct assay /// NM_001144658 /	NM_001144658 // GO:0003700 // transcription factor activity, sequence-specific DNA bind	0.21184	0.0476751	1.18904	1.18904	-17 days up vs -24 days	1.76771	0.130007	0.183863	1
9946	18185162	NM_079560 // mRpL19 // mitochondrial ribosomal protein L19 // 85A5-85A5 // 41028 /// FB	mRpL19	NM_079560	NM_079560 // GO:0006412 // translation // inferred from sequence or structural similari	NM_079560 // GO:0005762 // mitochondrial large ribosomal subunit // inferred from seque	NM_079560 // GO:0003735 // structural constituent of ribosome // inferred from sequence	0.0132637	0.0242741	1.1878	1.1878	-17 days up vs -24 days	5.49494	0.289228	0.131588	1
7438	18170978	NM_001316481 // CG32052 // CG32052 gene product from transcript CG32052-RE // 67C8-67C9	CG32052	NM_001316481	NM_168375 // GO:0008152 // metabolic process // inferred from electronic annotation //	---	NM_001316481 // GO:0004767 // sphingomyelin phosphodiesterase activity // inferred from	0.0998256	0.037877	1.18745	1.18745	-17 days up vs -24 days	2.6074	0.168092	0.161168	1
11356	18193185	NM_079787 // E(spl)m5-HLH // Enhancer of split m5, helix-loop-helix // 96F10-96F10|3-89	E(spl)m5-HLH	NM_079787	NM_079787 // GO:0006355 // regulation of transcription, DNA-templated // inferred from	NM_079787 // GO:0005634 // nucleus // inferred from direct assay /// NM_079787 // GO:0	NM_079787 // GO:0001078 // transcriptional repressor activity, RNA polymerase II core p	0.0734086	0.0149069	1.18741	1.18741	-17 days up vs -24 days	2.98136	0.127513	0.106925	1
9279	18181110	NM_001275133 // serp // serpentine // 76C2-76C2 // 40150 /// NM_168811 // serp // serpe	serp	NM_001275133	NM_001275133 // GO:0005975 // carbohydrate metabolic process // inferred from electroni	NM_001275133 // GO:0005604 // basement membrane // inferred from direct assay /// NM_0	NM_001275133 // GO:0004099 // chitin deacetylase activity // inferred from mutant pheno	0.0379081	0.0386307	1.18572	1.18572	-17 days up vs -24 days	3.85832	0.246917	0.15999	1
14187	18209279	NM_132882 // UQCR-14 // Ubiquinol-cytochrome c reductase 14 kDa subunit // 14B8-14B8 //	UQCR-14	NM_132882	NM_132882 // GO:0006122 // mitochondrial electron transport, ubiquinol to cytochrome c	NM_132882 // GO:0005750 // mitochondrial respiratory chain complex III // inferred from	NM_132882 // GO:0008121 // ubiquinol-cytochrome-c reductase activity // inferred from s	0.0306914	0.00975524	1.18483	1.18483	-17 days up vs -24 days	4.16182	0.147482	0.0885921	1
5410	18159774	NM_136880 // CG8888 // CG8888 gene product from transcript CG8888-RA // 48D8-48E1 // 36	CG8888	NM_136880	NM_136880 // GO:0008152 // metabolic process // inferred from electronic annotation //	NM_136880 // GO:0005886 // plasma membrane // inferred from direct assay /// NM_136880	NM_136880 // GO:0016614 // oxidoreductase activity, acting on CH-OH group of donors //	0.0333741	0.0409156	1.18467	1.18467	-17 days up vs -24 days	4.03995	0.263245	0.162901	1
7802	18173075	NR_037747 // CR42860 // ncRNA // 62C3-62C3 // 10178962 /// NR_037748 // CR42860 // ncRN	CR42860	NR_037747	---	---	---	0.0385808	0.00794645	1.1846	1.1846	-17 days up vs -24 days	3.83358	0.125779	0.0820244	1
7292	18170226	NM_140958 // CG13247 // CG13247 gene product from transcript CG13247-RA // 77B6-77B6 //	CG13247	NM_140958	NM_140958 // GO:0002021 // response to dietary excess // inferred from mutant phenotype	NM_140958 // GO:0005737 // cytoplasm // inferred from direct assay /// NM_140958 // GO	NM_140958 // GO:0003824 // catalytic activity // inferred from electronic annotation /	0.15445	0.0397448	1.18448	1.18448	-17 days up vs -24 days	2.10849	0.135161	0.160258	1
9061	18180071	NR_048228 // CR32252 // ncRNA // 64A10-64A10 // 12798359	CR32252	NR_048228	---	---	---	0.104517	0.0167649	1.18393	1.18393	-17 days up vs -24 days	2.55321	0.110613	0.108308	1
669	18132847	NM_001272861 // CG11377 // CG11377 gene product from transcript CG11377-RA // 21B2-21B2	CG11377	NM_001272861	---	---	NM_001272861 // GO:0005509 // calcium ion binding // inferred from electronic annotatio	0.282308	0.0452845	1.18338	1.18338	-17 days up vs -24 days	1.47019	0.0995612	0.1693	1
11175	18192059	NM_001276214 // Gprk2 // G protein-coupled receptor kinase 2 // 100C3-100C4 // 49045 //	Gprk2	NM_001276214	NM_001276214 // GO:0002805 // regulation of antimicrobial peptide biosynthetic process	NM_001276214 // GO:0005737 // cytoplasm // inferred from direct assay /// NM_001276214	NM_001276214 // GO:0004674 // protein serine/threonine kinase activity // non-traceable	0.12454	0.0323522	1.18338	1.18338	-17 days up vs -24 days	2.35013	0.134914	0.143517	1
15414	18216339	NM_133131 // CG7914 // CG7914 gene product from transcript CG7914-RA // 18A7-18A7 // 32	CG7914	NM_133131	NM_133131 // GO:0055114 // oxidation-reduction process // inferred from electronic anno	---	NM_133131 // GO:0016491 // oxidoreductase activity // inferred from electronic annotati	0.207554	0.0392899	1.18132	1.18132	-17 days up vs -24 days	1.7893	0.110474	0.154354	1
8447	18176924	NM_001274631 // CG13676 // CG13676 gene product from transcript CG13676-RB // 66B8-66B1	CG13676	NM_001274631	NM_001274631 // GO:0006030 // chitin metabolic process // inferred from electronic anno	NM_001274631 // GO:0005576 // extracellular region // inferred from electronic annotati	NM_001274631 // GO:0008061 // chitin binding // inferred from electronic annotation //	0.113351	0.0279966	1.18051	1.18051	-17 days up vs -24 days	2.45847	0.128228	0.130394	1
12249	18198418	NM_142602 // CG4424 // CG4424 gene product from transcript CG4424-RA // 92C1-92C1 // 42	CG4424	NM_142602	---	NM_142602 // GO:0005634 // nucleus // inferred from electronic annotation /// FBtr0083	NM_142602 // GO:0003676 // nucleic acid binding // inferred from electronic annotation	0.27297	0.0409702	1.18045	1.18045	-17 days up vs -24 days	1.50453	0.0940172	0.156224	1
4094	18151849	NM_137659 // DMAP1 // DNA methyltransferase 1 associated protein 1 // 57A9-57A9 // 3733	DMAP1	NM_137659	NM_137659 // GO:0002225 // positive regulation of antimicrobial peptide production // i	NM_137659 // GO:0005634 // nucleus // inferred from direct assay /// NM_137659 // GO:0	FBtr0086232 // GO:0003682 // chromatin binding // inferred from electronic annotation	0.261918	0.0433137	1.18021	1.18021	-17 days up vs -24 days	1.54689	0.0991679	0.16027	1
10841	18190057	NM_170029 // CG31161 // CG31161 gene product from transcript CG31161-RB // 94B6-94B6 //	CG31161	NM_170029	NM_170029 // GO:0008150 // biological_process // no biological data available /// FBtr	NM_170029 // GO:0005575 // cellular_component // no biological data available /// FBtr	NM_170029 // GO:0003674 // molecular_function // no biological data available /// FBtr	0.0577297	0.0301802	1.17982	1.17982	-17 days up vs -24 days	3.28809	0.176259	0.134013	1
7911	18173669	NM_001274803 // CG43896 // CG43896 gene product from transcript CG43896-RD // 68E4-68E4	CG43896	NM_001274803	NM_001274803 // GO:0006030 // chitin metabolic process // inferred from electronic anno	NM_001274803 // GO:0005576 // extracellular region // inferred from electronic annotati	NM_001274803 // GO:0008061 // chitin binding // inferred from electronic annotation //	0.0567779	0.00596318	1.17894	1.17894	-17 days up vs -24 days	3.30981	0.0927158	0.0700312	1
13858	18207615	NM_001297967 // CG12730 // CG12730 gene product from transcript CG12730-RB // 5A2-5A2 /	CG12730	NM_001297967	---	NM_001297967 // GO:0016020 // membrane // inferred from electronic annotation /// NM_0	---	0.00874101	0.0207781	1.17858	1.17858	-17 days up vs -24 days	6.24205	0.280013	0.112148	1
12498	18199758	NM_001276077 // Cpr97Ea // Cuticular protein 97Ea // 97E1-97E2 // 43258 /// NM_143272 /	Cpr97Ea	NM_001276077	NM_001276077 // GO:0040003 // chitin-based cuticle development // not recorded /// NM_	NM_001276077 // GO:0031012 // extracellular matrix // not recorded /// NM_001276077 //	NM_001276077 // GO:0005214 // structural constituent of chitin-based cuticle // inferre	0.125397	0.0356748	1.17744	1.17744	-17 days up vs -24 days	2.3423	0.132569	0.141494	1
15274	18215601	NM_132775 // Cyp4s3 // CG9081 gene product from transcript CG9081-RA // 13A12-13A12 //	Cyp4s3	NM_132775	NM_132775 // GO:0055114 // oxidation-reduction process // inferred from electronic anno	NM_132775 // GO:0016020 // membrane // non-traceable author statement /// NM_132775 //	NM_132775 // GO:0005506 // iron ion binding // inferred from electronic annotation ///	0.0713506	0.0189656	1.1768	1.1768	-17 days up vs -24 days	3.01698	0.127855	0.105946	1
9674	18183646	NM_079669 // Lgr1 // Leucine-rich repeat-containing G protein-coupled receptor 1 // 90C	Lgr1	NM_079669	NM_079669 // GO:0007186 // G-protein coupled receptor signaling pathway // inferred fro	NM_079669 // GO:0005887 // integral component of plasma membrane // inferred from direc	NM_079669 // GO:0004930 // G-protein coupled receptor activity // inferred from direct	0.0254349	0.0134884	1.17653	1.17653	-17 days up vs -24 days	4.44211	0.163584	0.0920644	1
6587	18166270	NM_079232 // mei-P22 // meiotic P22 // 65E9-65E9|3-21.5 cM // 38797 /// FBtr0076836 //	mei-P22	NM_079232	NM_079232 // GO:0007131 // reciprocal meiotic recombination // inferred from mutant phe	NM_079232 // GO:0000790 // nuclear chromatin // inferred from direct assay /// FBtr007	---	0.148412	0.0347275	1.17569	1.17569	-17 days up vs -24 days	2.15264	0.118096	0.137153	1
5535	18160375	NM_001299531 // CG12964 // CG12964 gene product from transcript CG12964-RB // 52A4-52A6	CG12964	NM_001299531	---	---	---	0.0426864	0.0110683	1.17563	1.17563	-17 days up vs -24 days	3.69288	0.124866	0.0845317	1
3507	18148447	NM_001259452 // RhoGEF2 // Rho guanine nucleotide exchange factor 2 // 53E4-53F1 // 369	RhoGEF2	NM_001259452	NM_001259452 // GO:0007015 // actin filament organization // inferred from mutant pheno	NM_001259452 // GO:0005826 // actomyosin contractile ring // inferred from direct assay	NM_001259452 // GO:0005089 // Rho guanyl-nucleotide exchange factor activity // inferre	0.143368	0.0170361	1.1747	1.1747	-17 days up vs -24 days	2.19115	0.0868924	0.0991401	1
11995	18197023	NM_079603 // Scgbeta // Sarcoglycan beta // 87B9-87B9 // 41525 /// FBtr0082596 // Scgbe	Scgbeta	NM_079603	NM_079603 // GO:0007517 // muscle organ development // inferred from electronic annotat	NM_079603 // GO:0016012 // sarcoglycan complex // inferred from sequence or structural	NM_079603 // GO:0008307 // structural constituent of muscle // inferred from sequence o	0.0294111	0.0401925	1.17465	1.17465	-17 days up vs -24 days	4.22453	0.246165	0.145676	1
9704	18183822	NM_079592 // RpL3 // Ribosomal protein L3 // 86D8-86D8 // 41347 /// NM_169377 // RpL3 /	RpL3	NM_079592	NM_079592 // GO:0000022 // mitotic spindle elongation // inferred from mutant phenotype	NM_079592 // GO:0022625 // cytosolic large ribosomal subunit // inferred from sequence	NM_079592 // GO:0003735 // structural constituent of ribosome // inferred from sequence	0.0144057	0.00702082	1.17419	1.17419	-17 days up vs -24 days	5.35399	0.151049	0.0705313	1
7070	18169121	NM_140360 // CG11262 // CG11262 gene product from transcript CG11262-RA // 69F4-69F4 //	CG11262	NM_140360	NM_140360 // GO:0055085 // transmembrane transport // inferred from electronic annotati	NM_140360 // GO:0016021 // integral component of membrane // inferred from electronic a	---	0.05986	0.0270286	1.17377	1.17377	-17 days up vs -24 days	3.24098	0.155085	0.119628	1
13542	18205551	NM_001272455 // Hex-A // Hexokinase A // 8E10-8E10|1-29.2 cM // 45875 /// NM_080109 //	Hex-A	NM_001272455	NM_001272455 // GO:0001678 // cellular glucose homeostasis // not recorded /// NM_0012	NM_001272455 // GO:0005829 // cytosol // not recorded /// NM_001272455 // GO:0005829 /	NM_001272455 // GO:0004340 // glucokinase activity // not recorded /// NM_001272455 //	0.0250006	0.0114344	1.17298	1.17298	-17 days up vs -24 days	4.4683	0.148716	0.083206	1
6183	18163895	NM_136817 // Cpr47Eg // Cuticular protein 47Eg // 47E5-47E5 // 36196 /// FBtr0088183 //	Cpr47Eg	NM_136817	NM_136817 // GO:0040003 // chitin-based cuticle development // not recorded /// NM_136	NM_136817 // GO:0031012 // extracellular matrix // not recorded /// NM_136817 // GO:00	NM_136817 // GO:0005214 // structural constituent of chitin-based cuticle // inferred f	0.0517733	0.0271252	1.17181	1.17181	-17 days up vs -24 days	3.43154	0.161054	0.117334	1
5957	18162668	NM_137268 // CG30099 // CG30099 gene product from transcript CG30099-RA // 53B1-53B1 //	CG30099	NM_137268	NM_137268 // GO:0008150 // biological_process // no biological data available /// FBtr	NM_137268 // GO:0005575 // cellular_component // no biological data available /// FBtr	NM_137268 // GO:0003674 // molecular_function // no biological data available /// FBtr	0.259963	0.0415078	1.1714	1.1714	-17 days up vs -24 days	1.55459	0.0889165	0.14299	1
7318	18170356	NM_001300208 // CG12984 // CG12984 gene product from transcript CG12984-RA // 78A2-78A2	CG12984	NM_001300208	NM_001300208 // GO:0008150 // biological_process // no biological data available /// N	NM_001300208 // GO:0005575 // cellular_component // no biological data available /// N	NM_001300208 // GO:0003674 // molecular_function // no biological data available /// N	0.0461449	0.0155439	1.17125	1.17125	-17 days up vs -24 days	3.58627	0.132073	0.0920689	1
916	18134185	NM_001169432 // r2d2 // CG7138 gene product from transcript CG7138-RA // 28C4-28C4 // 3	r2d2	NM_001169432	NM_001169432 // GO:0030422 // production of siRNA involved in RNA interference // infer	NM_001169432 // GO:0005634 // nucleus // inferred from direct assay /// NM_001169432 /	NM_001169432 // GO:0003725 // double-stranded RNA binding // inferred from sequence or	0.196538	0.0308135	1.17074	1.17074	-17 days up vs -24 days	1.8472	0.0908476	0.122953	1
12567	18200152	NM_143458 // CG7593 // CG7593 gene product from transcript CG7593-RA // 99B9-99B9 // 43	CG7593	NM_143458	NM_143458 // GO:0006909 // phagocytosis // inferred from mutant phenotype /// NM_14345	---	NM_143458 // GO:0008080 // N-acetyltransferase activity // inferred from electronic ann	0.195474	0.0284517	1.17073	1.17073	-17 days up vs -24 days	1.85298	0.0878456	0.118519	1
1989	18139831	NM_176064 // Hf // Helical Factor // 38A8-38A8 // 44038 /// FBtr0081306 // Hf // Helica	Hf	NM_176064	NM_176064 // GO:0045087 // innate immune response // inferred from expression pattern	---	---	4.76e-05	0.00795254	1.16961	1.16961	-17 days up vs -24 days	23.2453	0.652508	0.0701764	1
13209	18203682	NR_074051 // CR43655 // ncRNA // 94D5-94D5 // 14462509	CR43655	NR_074051	---	---	---	0.0401952	0.00813433	1.16951	1.16951	-17 days up vs -24 days	3.77622	0.106746	0.0706698	1
9733	18183975	NM_001300530 // pit // pitchoune // 93F13-94A1 // 42595 /// NM_079722 // pit // pitchou	pit	NM_001300530	NM_001300530 // GO:0008283 // cell proliferation // inferred from mutant phenotype ///	NM_001300530 // GO:0005634 // nucleus // non-traceable author statement /// NM_0013005	NM_001300530 // GO:0003676 // nucleic acid binding // inferred from electronic annotati	0.0634841	0.0266779	1.16921	1.16921	-17 days up vs -24 days	3.16521	0.143347	0.113221	1
13261	18204133	NM_143684 // CG11155 // CG11155 gene product from transcript CG11155-RD // 102F8-102F8	CG11155	NM_143684	NM_143684 // GO:0006811 // ion transport // inferred from electronic annotation /// NM	NM_143684 // GO:0005886 // plasma membrane // inferred from sequence or structural simi	NM_143684 // GO:0005234 // extracellular-glutamate-gated ion channel activity // inferr	0.1873	0.0220615	1.16911	1.16911	-17 days up vs -24 days	1.89867	0.079011	0.104035	1
1901	18139223	NM_001259156 // Lim3 // CG10699 gene product from transcript CG10699-RF // 37B13-37C1 /	Lim3	NM_001259156	NM_001259156 // GO:0006355 // regulation of transcription, DNA-templated // inferred fr	NM_001259156 // GO:0005634 // nucleus // inferred from sequence or structural similarit	NM_001259156 // GO:0003700 // transcription factor activity, sequence-specific DNA bind	0.00519693	0.0247505	1.16794	1.16794	-17 days up vs -24 days	7.26275	0.313727	0.107992	1
2356	18141948	NM_001298721 // CG9109 // CG9109 gene product from transcript CG9109-RA // 26B3-26B3 //	CG9109	NM_001298721	NM_001298721 // GO:0008152 // metabolic process // inferred from electronic annotation	NM_001298721 // GO:0016020 // membrane // inferred from electronic annotation /// NM_1	NM_001298721 // GO:0016757 // transferase activity, transferring glycosyl groups // inf	0.0472623	0.0259551	1.1677	1.1677	-17 days up vs -24 days	3.55383	0.156369	0.11	1
6091	18163319	NM_001299493 // CG33469 // CG33469 gene product from transcript CG33469-RB // 51B6-51B6	CG33469	NM_001299493	NM_001299493 // GO:0008150 // biological_process // no biological data available /// N	NM_001299493 // GO:0005575 // cellular_component // no biological data available /// N	NM_001299493 // GO:0003674 // molecular_function // no biological data available /// N	0.23661	0.0439669	1.16527	1.16527	-17 days up vs -24 days	1.65191	0.0909331	0.137618	1
15035	18214456	NM_001298014 // ND-B16.6 // NADH dehydrogenase (ubiquinone) B16.6 subunit // 5F2-5F2 //	ND-B16.6	NM_001298014	NM_001298014 // GO:0006120 // mitochondrial electron transport, NADH to ubiquinone // i	NM_001298014 // GO:0005747 // mitochondrial respiratory chain complex I // inferred fro	NM_001298014 // GO:0003954 // NADH dehydrogenase activity // inferred from sequence or	0.00651714	0.00208706	1.1651	1.1651	-17 days up vs -24 days	6.80561	0.117083	0.0430098	1
14714	18212544	NM_001298557 // sw // short wing // 19C1-19C1|1-64.0 cM // 44160 /// NM_001298558 // sw	sw	NM_001298557	NM_001298557 // GO:0000226 // microtubule cytoskeleton organization // inferred from mu	NM_001298557 // GO:0005868 // cytoplasmic dynein complex // inferred from direct assay	NM_001298557 // GO:0003777 // microtubule motor activity // inferred from direct assay	0.0168887	0.00806403	1.16482	1.16482	-17 days up vs -24 days	5.08884	0.136145	0.0668844	1
4375	18153348	NM_165887 // CG30047 // CG30047 gene product from transcript CG30047-RA // 49A1-49A1 //	CG30047	NM_165887	NM_165887 // GO:0006508 // proteolysis // inferred from electronic annotation /// NM_1	NM_165887 // GO:0005575 // cellular_component // no biological data available /// NM_1	NM_165887 // GO:0008237 // metallopeptidase activity // inferred from electronic annota	0.0635415	0.0131691	1.16347	1.16347	-17 days up vs -24 days	3.16405	0.100133	0.0791177	1
14331	18210136	NM_001042858 // CG13865 // CG13865 gene product from transcript CG13865-RC // 20F3-20F4	CG13865	NM_001042858	NM_001042858 // GO:0008150 // biological_process // no biological data available /// N	NM_001042858 // GO:0005575 // cellular_component // no biological data available /// N	NM_001042858 // GO:0003674 // molecular_function // no biological data available /// N	0.0475351	0.00541637	1.16257	1.16257	-17 days up vs -24 days	3.54605	0.0804883	0.0567451	1
15504	18216824	NM_001272181 // CG3713 // CG3713 gene product from transcript CG3713-RA // 1D1-1D1 // 5	CG3713	NM_001272181	---	---	---	0.00935755	0.0212008	1.16244	1.16244	-17 days up vs -24 days	6.11577	0.232218	0.0949258	1
3186	18146514	NR_048010 // mir-2b-2 // mir-2b-2 stem loop // 37F2-37F2 // 12798018	mir-2b-2	NR_048010	---	---	---	0.0333744	0.00387425	1.16243	1.16243	-17 days up vs -24 days	4.03994	0.0819036	0.0506837	1
13203	18203667	NR_048492 // CR43633 // ncRNA // 96F3-96F3 // 12798266	CR43633	NR_048492	---	BT124918 // GO:0016020 // membrane // inferred from electronic annotation /// BT124918	---	0.0070926	0.000653722	1.16204	1.16204	-17 days up vs -24 days	6.63986	0.0789189	0.0297141	1
14245	18209624	NM_133063 // CG15056 // CG15056 gene product from transcript CG15056-RA // 17A11-17A11	CG15056	NM_133063	---	---	---	0.247658	0.0383741	1.16183	1.16183	-17 days up vs -24 days	1.60459	0.0793539	0.123635	1
2531	18143079	NM_135594 // CG7294 // CG7294 gene product from transcript CG7294-RA // 32A4-32A4 // 34	CG7294	NM_135594	---	---	---	0.0184824	0.0118984	1.16137	1.16137	-17 days up vs -24 days	4.94204	0.146822	0.074272	1
12329	18198847	NM_142833 // Takl2 // Tak1-like 2 // 94C4-94C4 // 42692 /// FBtr0302204 // Takl2 // Tak	Takl2	NM_142833	NM_142833 // GO:0006468 // protein phosphorylation // inferred from electronic annotati	NM_142833 // GO:0005737 // cytoplasm // inferred from sequence or structural similarity	NM_142833 // GO:0004672 // protein kinase activity // inferred from sequence or structu	0.10459	0.0412031	1.16051	1.16051	-17 days up vs -24 days	2.55239	0.128781	0.126138	1
14690	18212370	NM_132978 // CG10598 // CG10598 gene product from transcript CG10598-RC // 15F4-15F4 //	CG10598	NM_132978	---	---	---	0.0100202	0.0401926	1.15979	1.15979	-17 days up vs -24 days	5.99068	0.296061	0.123551	1
12231	18198305	NM_001275805 // CG6231 // CG6231 gene product from transcript CG6231-RC // 92A10-92A11	CG6231	NM_001275805	NM_001275805 // GO:0055085 // transmembrane transport // inferred from electronic annot	NM_001275805 // GO:0016021 // integral component of membrane // inferred from electroni	NM_001275805 // GO:0008513 // secondary active organic cation transmembrane transporter	0.0446946	0.0111389	1.15954	1.15954	-17 days up vs -24 days	3.62978	0.102965	0.070917	1
8748	18178491	NM_001275052 // CG6479 // CG6479 gene product from transcript CG6479-RC // 74A5-74A5 //	CG6479	NM_001275052	NM_001275052 // GO:0006909 // phagocytosis // inferred from mutant phenotype /// NM_14	NM_001275052 // GO:0016020 // membrane // inferred from electronic annotation /// NM_0	---	0.0385627	0.019202	1.15923	1.15923	-17 days up vs -24 days	3.83424	0.134538	0.0877214	1
9304	18181303	NM_001144512 // CG42674 // CG42674 gene product from transcript CG42674-RF // 77A1-77A1	CG42674	NM_001144512	NM_001144512 // GO:0007155 // cell adhesion // inferred from mutant phenotype /// NM_0	NM_001144512 // GO:0005575 // cellular_component // no biological data available /// N	NM_001144512 // GO:0005089 // Rho guanyl-nucleotide exchange factor activity // inferre	0.0350556	0.00587052	1.15824	1.15824	-17 days up vs -24 days	3.96935	0.0880673	0.055467	1
15875	18218849	NM_078489 // Cdk7 // Cyclin-dependent kinase 7 // 4F4-4F4 // 31441 /// FBtr0070756 // C	Cdk7	NM_078489	NM_078489 // GO:0000079 // regulation of cyclin-dependent protein serine/threonine kina	NM_078489 // GO:0005634 // nucleus // inferred from direct assay /// NM_078489 // GO:0	NM_078489 // GO:0000990 // transcription factor activity, core RNA polymerase binding /	0.157966	0.0315698	1.15779	1.15779	-17 days up vs -24 days	2.08368	0.0895345	0.107423	1
12390	18199226	NM_001275972 // CG5515 // CG5515 gene product from transcript CG5515-RC // 95E8-95E8 //	CG5515	NM_001275972	---	---	FBtr0084574 // GO:0005515 // protein binding // inferred from electronic annotation //	0.17567	0.0393944	1.15642	1.15642	-17 days up vs -24 days	1.96776	0.0925425	0.117574	1
8106	18175032	NM_143802 // Su(z)12 // CG8013 gene product from transcript CG8013-RB // 76D4-76D4|3-49	Su(z)12	NM_143802	NM_143802 // GO:0007517 // muscle organ development // inferred from mutant phenotype	NM_143802 // GO:0005634 // nucleus // inferred from direct assay /// NM_143802 // GO:0	NM_143802 // GO:0005515 // protein binding // inferred from physical interaction /// N	0.15542	0.0475845	1.15541	1.15541	-17 days up vs -24 days	2.10158	0.107481	0.127857	1
1409	18136879	NM_164408 // CG31922 // CG31922 gene product from transcript CG31922-RA // 21F1-21F2 //	CG31922	NM_164408	NM_164408 // GO:0000398 // mRNA splicing, via spliceosome // inferred from sequence or	NM_164408 // GO:0005689 // U12-type spliceosomal complex // inferred from sequence or s	NM_164408 // GO:0008270 // zinc ion binding // inferred from electronic annotation ///	0.0331057	0.0041219	1.1544	1.1544	-17 days up vs -24 days	4.05161	0.0762787	0.0470669	1
13560	18205705	NM_001272253 // pcx // pecanex // 2F1-2F1|1-0.9 cM // 31204 /// NM_001272254 // pcx //	pcx	NM_001272253	NM_001272253 // GO:0007029 // endoplasmic reticulum organization // inferred from mutan	NM_001272253 // GO:0005783 // endoplasmic reticulum // inferred from direct assay ///	---	0.0258586	0.0123068	1.15363	1.15363	-17 days up vs -24 days	4.41706	0.121324	0.0686677	1
678	18132890	NM_134679 // CG13692 // CG13692 gene product from transcript CG13692-RA // 21C2-21C2 //	CG13692	NM_134679	NM_134679 // GO:0006471 // protein ADP-ribosylation // inferred from sequence or struct	NM_134679 // GO:0005622 // intracellular // inferred from electronic annotation /// NM	NM_134679 // GO:0003924 // GTPase activity // inferred from sequence or structural simi	0.0152684	0.00857251	1.15302	1.15302	-17 days up vs -24 days	5.25607	0.125213	0.0595562	1
11864	18196156	NM_141625 // CG8866 // CG8866 gene product from transcript CG8866-RA // 85D11-85D11 //	CG8866	NM_141625	NM_141625 // GO:0006468 // protein phosphorylation // inferred from sequence or structu	NM_141625 // GO:0005737 // cytoplasm // inferred from sequence or structural similarity	NM_141625 // GO:0004672 // protein kinase activity // non-traceable author statement /	0.2335	0.0404883	1.15291	1.15291	-17 days up vs -24 days	1.66569	0.076122	0.11425	1
9347	18181599	NM_001259889 // CG43085 // CG43085 gene product from transcript CG43085-RB // 74E4-74E4	CG43085	NM_001259889	---	---	---	0.155707	0.0307609	1.1527	1.1527	-17 days up vs -24 days	2.09955	0.0838557	0.0998496	1
4184	18152276	NM_137870 // CG13526 // CG13526 gene product from transcript CG13526-RA // 59A4-59A4 //	CG13526	NM_137870	---	---	NM_137870 // GO:0005509 // calcium ion binding // inferred from sequence or structural	0.123433	0.0467285	1.15251	1.15251	-17 days up vs -24 days	2.36033	0.115459	0.122292	1
8099	18175009	NR_001980 // snoRNA:Me28S-G764 // ncRNA // 80B1-80B1 // 3771811	snoRNA:Me28S-G764	NR_001980	---	NR_001980 // GO:0005730 // nucleolus // inferred from sequence or structural similarity	---	0.21974	0.0417527	1.15204	1.15204	-17 days up vs -24 days	1.72919	0.0793982	0.114791	1
13030	18202707	NM_001260075 // rump // rumpelstiltskin // 85D18-85D19 // 41138 /// NM_141642 // rump /	rump	NM_001260075	NM_001260075 // GO:0007067 // mitotic nuclear division // inferred from mutant phenotyp	NM_001260075 // GO:0000790 // nuclear chromatin // inferred from direct assay /// NM_0	NM_001260075 // GO:0000166 // nucleotide binding // inferred from electronic annotation	0.0541109	0.0185821	1.15135	1.15135	-17 days up vs -24 days	3.37302	0.106215	0.0787239	1
8819	18178856	NM_140855 // CG14095 // CG14095 gene product from transcript CG14095-RA // 76B3-76B3 //	CG14095	NM_140855	---	---	---	0.156961	0.0261774	1.15117	1.15117	-17 days up vs -24 days	2.09071	0.0761407	0.0910463	1
9907	18184973	NM_141457 // CG10032 // CG10032 gene product from transcript CG10032-RA // 84D3-84D3 //	CG10032	NM_141457	NM_141457 // GO:0008150 // biological_process // no biological data available /// FBtr	NM_141457 // GO:0005575 // cellular_component // no biological data available /// FBtr	NM_141457 // GO:0003674 // molecular_function // no biological data available /// FBtr	0.0789894	0.0129907	1.15063	1.15063	-17 days up vs -24 days	2.8904	0.0781352	0.0675817	1
932	18134295	NM_135353 // CG8349 // CG8349 gene product from transcript CG8349-RA // 28F3-28F3 // 34	CG8349	NM_135353	NM_135353 // GO:0009972 // cytidine deamination // inferred from electronic annotation	---	NM_135353 // GO:0004126 // cytidine deaminase activity // inferred from sequence or str	0.244164	0.0494526	1.14926	1.14926	-17 days up vs -24 days	1.6193	0.0783756	0.121002	1
12380	18199147	NM_001260343 // CG12268 // CG12268 gene product from transcript CG12268-RB // 95D1-95D1	CG12268	NM_001260343	NM_001260343 // GO:0010025 // wax biosynthetic process // --- /// NM_001260343 // GO:00	NM_001260343 // GO:0005777 // peroxisome // --- /// NM_001260343 // GO:0016020 // membr	NM_001260343 // GO:0080019 // fatty-acyl-CoA reductase (alcohol-forming) activity // in	0.00636724	0.0282705	1.14837	1.14837	-17 days up vs -24 days	6.85167	0.249469	0.0910249	1
13442	18205118	---		---	---	---	---	0.053023	0.0178653	1.14796	1.14796	-17 days up vs -24 days	3.39987	0.100971	0.0742461	1
13057	18202901	NM_001104355 // Dscam3 // Down syndrome cell adhesion molecule 3 // 90B1-90B1 // 42103	Dscam3	NM_001104355	NM_001104355 // GO:0007155 // cell adhesion // inferred from sequence or structural sim	NM_001104355 // GO:0005886 // plasma membrane // inferred from sequence or structural s	NM_001104355 // GO:0042802 // identical protein binding // inferred from physical inter	0.158057	0.0349537	1.1478	1.1478	-17 days up vs -24 days	2.08305	0.0831494	0.0997929	1
13476	18205191	NR_026601 // Su(Ste):CR42407 // ncRNA // --- // 7354440	Su(Ste):CR42407	NR_026601	---	---	---	0.0232721	0.0420091	1.14779	1.14779	-17 days up vs -24 days	4.57821	0.199982	0.109203	1
10203	18186504	NM_001300411 // CG4520 // CG4520 gene product from transcript CG4520-RB // 89A3-89A3 //	CG4520	NM_001300411	NM_001300411 // GO:0055085 // transmembrane transport // inferred from electronic annot	NM_001300411 // GO:0005741 // mitochondrial outer membrane // inferred from electronic	NM_001300411 // GO:0015266 // protein channel activity // --- /// NM_142226 // GO:00152	0.1349	0.0340636	1.1467	1.1467	-17 days up vs -24 days	2.25946	0.0878506	0.0972032	1
13963	18208177	NM_001272419 // CG12772 // CG12772 gene product from transcript CG12772-RB // 8A1-8A1 /	CG12772	NM_001272419	NM_001272419 // GO:0010507 // negative regulation of autophagy // inferred from sequenc	NM_001272419 // GO:0005769 // early endosome // inferred from sequence or structural si	---	0.103682	0.0346748	1.14666	1.14666	-17 days up vs -24 days	2.56264	0.100435	0.0979798	1
5683	18161216	NM_137611 // CG16894 // CG16894 gene product from transcript CG16894-RA // 56F9-56F9 //	CG16894	NM_137611	NM_137611 // GO:0008150 // biological_process // no biological data available /// NM_1	NM_137611 // GO:0005575 // cellular_component // no biological data available /// NM_1	NM_137611 // GO:0003674 // molecular_function // no biological data available /// NM_1	0.276551	0.0421115	1.14659	1.14659	-17 days up vs -24 days	1.49121	0.0642343	0.107688	1
7029	18168940	NM_140244 // Bmcp // CG7314 gene product from transcript CG7314-RB // 68D3-68D3 // 3932	Bmcp	NM_140244	NM_140244 // GO:0006839 // mitochondrial transport // not recorded /// NM_140244 // GO	NM_140244 // GO:0005743 // mitochondrial inner membrane // inferred from sequence or st	NM_140244 // GO:0022857 // transmembrane transporter activity // not recorded /// NM_1	0.098827	0.0268658	1.1465	1.1465	-17 days up vs -24 days	2.61933	0.091012	0.0868659	1
2294	18141607	NM_134993 // CG15440 // CG15440 gene product from transcript CG15440-RA // 24F3-24F3 //	CG15440	NM_134993	NM_134993 // GO:0000398 // mRNA splicing, via spliceosome // inferred from sequence or	---	NM_134993 // GO:0000166 // nucleotide binding // inferred from electronic annotation /	0.0251925	0.0110118	1.14639	1.14639	-17 days up vs -24 days	4.45666	0.107219	0.0601455	1
1747	18138402	NM_001259063 // CG43167 // CG43167 gene product from transcript CG43167-RA // 32F4-32F4	CG43167	NM_001259063	NM_001259063 // GO:0008150 // biological_process // no biological data available /// F	NM_001259063 // GO:0016020 // membrane // inferred from electronic annotation /// NM_0	NM_001259063 // GO:0003674 // molecular_function // no biological data available /// F	0.189163	0.0425599	1.14589	1.14589	-17 days up vs -24 days	1.88806	0.0810355	0.1073	1
6786	18167536	NM_139536 // CG11505 // CG11505 gene product from transcript CG11505-RD // 63C1-63C1 //	CG11505	NM_139536	NM_139536 // GO:0008150 // biological_process // no biological data available /// NM_1	NM_139536 // GO:0005575 // cellular_component // no biological data available /// NM_1	NM_139536 // GO:0000166 // nucleotide binding // inferred from electronic annotation /	0.0320289	0.0166997	1.14481	1.14481	-17 days up vs -24 days	4.09954	0.113759	0.0693732	1
2524	18143049	NM_135569 // CG7456 // CG7456 gene product from transcript CG7456-RA // 31F1-31F1 // 34	CG7456	NM_135569	NM_135569 // GO:0007030 // Golgi organization // inferred from sequence or structural s	NM_135569 // GO:0017119 // Golgi transport complex // inferred from sequence or structu	---	0.0442035	0.0339397	1.14431	1.14431	-17 days up vs -24 days	3.6449	0.137189	0.0940968	1
5966	18162729	NM_166323 // Ir56a // Ionotropic receptor 56a // 56B3-56B3 // 246471 /// FBtr0086595 //	Ir56a	NM_166323	NM_166323 // GO:0009593 // detection of chemical stimulus // inferred from sequence or	NM_166323 // GO:0016021 // integral component of membrane // not recorded /// NM_16632	NM_166323 // GO:0015276 // ligand-gated ion channel activity // not recorded /// NM_16	0.00656423	0.00517617	1.14391	1.14391	-17 days up vs -24 days	6.7914	0.120936	0.0445182	1
14855	18213413	NM_001272200 // CG11418 // CG11418 gene product from transcript CG11418-RC // 1F4-1F4 /	CG11418	NM_001272200	NM_001272200 // GO:0006378 // mRNA polyadenylation // inferred from sequence or structu	NM_001272200 // GO:0005739 // mitochondrion // inferred from sequence or structural sim	NM_001272200 // GO:0044822 // poly(A) RNA binding // inferred from sequence or structur	0.139255	0.0489345	1.14348	1.14348	-17 days up vs -24 days	2.22373	0.0994151	0.111766	1
8688	18178177	NM_001274968 // pHCl // CG44099 gene product from transcript CG44099-RL // 72A2-72A4 //	pHCl	NM_001274968	NM_001274968 // GO:0006811 // ion transport // inferred from electronic annotation ///	NM_001274968 // GO:0016935 // glycine-gated chloride channel complex // inferred from s	NM_001274968 // GO:0005254 // chloride channel activity // inferred from direct assay	0.123278	0.0270971	1.14248	1.14248	-17 days up vs -24 days	2.36177	0.0782054	0.0827827	1
12896	18201902	NM_001144560 // Mical // Molecule interacting with CasL // 85F5-85F7 // 41225 /// NM_00	Mical	NM_001144560	NM_001144560 // GO:0007015 // actin filament organization // inferred from mutant pheno	NM_001144560 // GO:0005829 // cytosol // non-traceable author statement /// NM_0011445	NM_001144560 // GO:0003779 // actin binding // inferred from direct assay /// NM_00114	0.107271	0.0436185	1.14192	1.14192	-17 days up vs -24 days	2.5227	0.104112	0.103175	1
5624	18160884	NM_137438 // CG5770 // CG5770 gene product from transcript CG5770-RA // 55B1-55B1 // 37	CG5770	NM_137438	---	---	---	0.0155294	0.00698694	1.14163	1.14163	-17 days up vs -24 days	5.22774	0.100186	0.0479108	1
12717	18200843	NM_143615 // pygo // pygopus // 100C6-100C6|3-102 cM // 43718 /// FBtr0085806 // pygo /	pygo	NM_143615	NM_143615 // GO:0006351 // transcription, DNA-templated // inferred from mutant phenoty	NM_143615 // GO:0005634 // nucleus // inferred from direct assay /// NM_143615 // GO:0	NM_143615 // GO:0001105 // RNA polymerase II transcription coactivator activity // infe	0.067193	0.0204543	1.14046	1.14046	-17 days up vs -24 days	3.09278	0.0881831	0.0712815	1
10696	18189191	NM_001276180 // CDase // Ceramidase // 99F5-99F6 // 43618 /// NM_143540 // CDase // Cer	CDase	NM_001276180	NM_001276180 // GO:0006665 // sphingolipid metabolic process // inferred from direct as	NM_001276180 // GO:0005576 // extracellular region // inferred from direct assay /// N	NM_001276180 // GO:0017040 // ceramidase activity // inferred from direct assay /// NM	0.127027	0.0261861	1.14021	1.14021	-17 days up vs -24 days	2.32759	0.07365	0.0791055	1
8672	18178095	NM_140498 // Msh6 // CG7003 gene product from transcript CG7003-RA // 71B6-71B6 // 3965	Msh6	NM_140498	NM_140498 // GO:0000710 // meiotic mismatch repair // inferred from mutant phenotype /	NM_140498 // GO:0000228 // nuclear chromosome // not recorded /// NM_140498 // GO:0032	NM_140498 // GO:0000400 // four-way junction DNA binding // not recorded /// NM_140498	0.141776	0.0224372	1.13997	1.13997	-17 days up vs -24 days	2.20363	0.0649419	0.073676	1
12754	18201071	NM_001276110 // CG31050 // CG31050 gene product from transcript CG31050-RB // 98E1-98E1	CG31050	NM_001276110	NM_001276110 // GO:0008150 // biological_process // no biological data available /// N	NM_001276110 // GO:0005575 // cellular_component // no biological data available /// N	NM_001276110 // GO:0003674 // molecular_function // no biological data available /// N	0.0272018	0.00777816	1.13953	1.13953	-17 days up vs -24 days	4.34076	0.0840276	0.0483945	1
11067	18191230	NM_001104214 // 5-HT2A // 5-hydroxytryptamine (serotonin) receptor 2A // 82C3-82D5 // 4	5-HT2A	NM_001104214	NM_001104214 // GO:0007210 // serotonin receptor signaling pathway // inferred from dir	NM_001104214 // GO:0005886 // plasma membrane // inferred from direct assay /// NM_001	NM_001104214 // GO:0001587 // Gq/11-coupled serotonin receptor activity // non-traceabl	0.0523038	0.0441918	1.13914	1.13914	-17 days up vs -24 days	3.41799	0.136848	0.100094	1
8435	18176866	NM_139882 // CG7716 // CG7716 gene product from transcript CG7716-RA // 66A6-66A6 // 38	CG7716	NM_139882	NM_139882 // GO:0007020 // microtubule nucleation // inferred from sequence or structur	NM_139882 // GO:0000922 // spindle pole // inferred from electronic annotation /// NM_	NM_139882 // GO:0005200 // structural constituent of cytoskeleton // inferred from sequ	0.11647	0.0270164	1.13823	1.13823	-17 days up vs -24 days	2.42705	0.0758259	0.078105	1
8234	18175832	NM_139369 // CG7879 // CG7879 gene product from transcript CG7879-RB // 62A5-62A6 // 38	CG7879	NM_139369	NM_139369 // GO:0000381 // regulation of alternative mRNA splicing, via spliceosome //	NM_139369 // GO:0005634 // nucleus // inferred by curator /// NM_167896 // GO:0005634	NM_139369 // GO:0000166 // nucleotide binding // inferred from electronic annotation /	0.0175561	0.0200988	1.13611	1.13611	-17 days up vs -24 days	5.02544	0.134077	0.0666991	1
3060	18145767	NM_001042959 // Spf45 // CG17540 gene product from transcript CG17540-RB // --- // 3355	Spf45	NM_001042959	NM_001042959 // GO:0000381 // regulation of alternative mRNA splicing, via spliceosome	NM_001042959 // GO:0005681 // spliceosomal complex // inferred from sequence or structu	NM_001042959 // GO:0000166 // nucleotide binding // inferred from electronic annotation	0.151775	0.0294248	1.13591	1.13591	-17 days up vs -24 days	2.1278	0.0669484	0.0786591	1
1572	18137391	NM_001042886 // CG34109 // CG34109 gene product from transcript CG34109-RC // 31A2-31A2	CG34109	NM_001042886	NM_001042886 // GO:0022008 // neurogenesis // inferred from mutant phenotype /// FBtr0	NM_001042886 // GO:0016020 // membrane // inferred from electronic annotation /// NM_0	---	0.176046	0.0257401	1.13571	1.13571	-17 days up vs -24 days	1.96544	0.0580489	0.0738369	1
2530	18143077	NM_001273432 // CG7296 // CG7296 gene product from transcript CG7296-RB // 32A4-32A4 //	CG7296	NM_001273432	---	---	---	0.087967	0.0346197	1.1353	1.1353	-17 days up vs -24 days	2.75885	0.092889	0.0841736	1
8212	18175709	NM_001144395 // CG13896 // CG13896 gene product from transcript CG13896-RB // 61C8-61C8	CG13896	NM_001144395	---	---	---	0.0218025	0.00227872	1.13499	1.13499	-17 days up vs -24 days	4.67959	0.0567861	0.0303371	1
8800	18178769	NM_140817 // Ir75d // Ionotropic receptor 75d // 75E5-75E5 // 40065 /// FBtr0309798 //	Ir75d	NM_140817	NM_140817 // GO:0050907 // detection of chemical stimulus involved in sensory perceptio	NM_140817 // GO:0016020 // membrane // inferred from electronic annotation /// NM_1408	NM_140817 // GO:0004970 // ionotropic glutamate receptor activity // inferred from elec	0.0794932	0.0479083	1.13481	1.13481	-17 days up vs -24 days	2.88256	0.113382	0.0983343	1
14290	18209856	NM_001298525 // CG14215 // CG14215 gene product from transcript CG14215-RA // 18D13-18D	CG14215	NM_001298525	NM_001298525 // GO:0008150 // biological_process // no biological data available /// N	NM_001298525 // GO:0005575 // cellular_component // no biological data available /// N	NM_001298525 // GO:0003674 // molecular_function // no biological data available /// N	0.318009	0.0490007	1.13458	1.13458	-17 days up vs -24 days	1.34954	0.0535443	0.09919	1
7755	18172612	NM_001169885 // Mp // Multiplexin // 65E1-65E2 // 38769 /// NM_001169886 // Mp // Multi	Mp	NM_001169885	NM_001169885 // GO:0007005 // mitochondrion organization // inferred from mutant phenot	NM_001169885 // GO:0005581 // collagen trimer // inferred from sequence or structural s	NM_001169885 // GO:0005198 // structural molecule activity // inferred from electronic	0.0360947	0.0139609	1.1345	1.1345	-17 days up vs -24 days	3.9277	0.0883433	0.0562309	1
2353	18141922	NM_001258979 // lid // little imaginal discs // 26B2-26B2 // 33837 /// NM_001258980 //	lid	NM_001258979	NM_001258979 // GO:0006325 // chromatin organization // inferred from mutant phenotype	NM_001258979 // GO:0005634 // nucleus // inferred from direct assay /// NM_001258979 /	NM_001258979 // GO:0003677 // DNA binding // inferred from electronic annotation /// N	0.137832	0.0460164	1.13447	1.13447	-17 days up vs -24 days	2.23526	0.0856975	0.0958475	1
9548	18182732	NM_079763 // tld // tolloid // 96A19-96A19|3-85 cM // 42945 /// FBtr0084691 // tld // t	tld	NM_079763	NM_079763 // GO:0006508 // proteolysis // non-traceable author statement /// NM_079763	NM_079763 // GO:0005576 // extracellular region // non-traceable author statement ///	NM_079763 // GO:0004222 // metalloendopeptidase activity // inferred from sequence or s	0.0910309	0.0372166	1.13437	1.13437	-17 days up vs -24 days	2.71753	0.0935358	0.0860486	1
12143	18197842	NM_142334 // CG3995 // CG3995 gene product from transcript CG3995-RA // 89E10-89E10 //	CG3995	NM_142334	---	---	NM_142334 // GO:0003677 // DNA binding // inferred from electronic annotation /// FBtr	0.0470256	0.041741	1.13308	1.13308	-17 days up vs -24 days	3.56062	0.127388	0.089442	1
13547	18205605	NM_057275 // l(1)sc // lethal of scute // 1B1-1B1|1-0.0 cM // 30983 /// FBtr0070074 //	l(1)sc	NM_057275	NM_057275 // GO:0006357 // regulation of transcription from RNA polymerase II promoter	NM_057275 // GO:0005634 // nucleus // inferred from sequence or structural similarity	NM_057275 // GO:0000977 // RNA polymerase II regulatory region sequence-specific DNA bi	0.107511	0.0190478	1.13284	1.13284	-17 days up vs -24 days	2.52008	0.0628023	0.0623019	1
11294	18192665	NM_001170146 // Caf1-55 // Chromatin assembly factor 1, p55 subunit // 88E3-88E3 // 418	Caf1-55	NM_001170146	NM_001170146 // GO:0000122 // negative regulation of transcription from RNA polymerase	NM_001170146 // GO:0005634 // nucleus // inferred from direct assay /// NM_001170146 /	NM_001170146 // GO:0003682 // chromatin binding // non-traceable author statement ///	0.00771618	0.0379239	1.1327	1.1327	-17 days up vs -24 days	6.47749	0.219772	0.0848215	1
1700	18138209	NM_001273557 // CG42817 // CG42817 gene product from transcript CG42817-RB // 35F1-35F1	CG42817	NM_001273557	---	NM_001273557 // GO:0016020 // membrane // inferred from electronic annotation /// NM_0	---	0.11932	0.02493	1.13148	1.13148	-17 days up vs -24 days	2.39919	0.0658252	0.068591	1
12054	18197324	NM_142084 // CG9722 // CG9722 gene product from transcript CG9722-RA // 88A10-88A10 //	CG9722	NM_142084	---	NM_142084 // GO:0016020 // membrane // inferred from electronic annotation /// NM_1420	NM_142084 // GO:0005102 // receptor binding // inferred from sequence or structural sim	0.0527189	0.0308673	1.13107	1.13107	-17 days up vs -24 days	3.4075	0.102396	0.0751254	1
14133	18208989	NM_132742 // CG5347 // CG5347 gene product from transcript CG5347-RA // 12F4-12F4 // 32	CG5347	NM_132742	NM_132742 // GO:0000209 // protein polyubiquitination // inferred from sequence or stru	NM_132742 // GO:0005575 // cellular_component // no biological data available /// FBtr	NM_132742 // GO:0004842 // ubiquitin-protein transferase activity // inferred from sequ	0.0105856	0.0297788	1.13087	1.13087	-17 days up vs -24 days	5.8915	0.173619	0.0736737	1
7710	18172304	NM_001169895 // CG8628 // CG8628 gene product from transcript CG8628-RA // 65E4-65E4 //	CG8628	NM_001169895	NM_001169895 // GO:0042049 // cellular acyl-CoA homeostasis // inferred from sequence o	---	NM_001169895 // GO:0000062 // fatty-acyl-CoA binding // inferred from sequence or struc	0.229766	0.0437381	1.13086	1.13086	-17 days up vs -24 days	1.68249	0.0597128	0.0887267	1
13054	18202874	NM_001170299 // CG42592 // CG42592 gene product from transcript CG42592-RA // 99C2-99C2	CG42592	NM_001170299	NM_001170299 // GO:0008150 // biological_process // no biological data available /// F	NM_001170299 // GO:0005575 // cellular_component // no biological data available /// N	NM_001170299 // GO:0003674 // molecular_function // no biological data available /// F	0.198781	0.041418	1.12894	1.12894	-17 days up vs -24 days	1.83511	0.061622	0.0839486	1
7283	18170165	NM_140938 // CG13813 // CG13813 gene product from transcript CG13813-RA // 77A3-77A3 //	CG13813	NM_140938	NM_140938 // GO:0008152 // metabolic process // inferred from electronic annotation //	---	NM_140938 // GO:0016740 // transferase activity // inferred from electronic annotation	0.00429945	0.0104497	1.12891	1.12891	-17 days up vs -24 days	7.66152	0.142368	0.0464555	1
879	18133945	NM_001298749 // COX5B // Cytochrome c oxidase subunit 5B // 26E3-26E3 // 33918 /// NM_1	COX5B	NM_001298749	NM_001298749 // GO:0006123 // mitochondrial electron transport, cytochrome c to oxygen	NM_001298749 // GO:0005739 // mitochondrion // inferred from direct assay /// NM_00129	NM_001298749 // GO:0004129 // cytochrome-c oxidase activity // inferred from sequence o	0.100094	0.0420885	1.12819	1.12819	-17 days up vs -24 days	2.60423	0.0871955	0.0837058	1
5505	18160252	NM_001299489 // CG17385 // CG17385 gene product from transcript CG17385-RB // 51A1-51A2	CG17385	NM_001299489	---	---	NM_001299489 // GO:0003676 // nucleic acid binding // inferred from electronic annotati	0.00239774	0.0070431	1.12809	1.12809	-17 days up vs -24 days	8.98759	0.14301	0.0397799	1
3384	18147642	NM_001169695 // Jhe // Juvenile hormone esterase // 52E5-52E5 // 36780 /// NM_001299547	Jhe	NM_001169695	NM_001169695 // GO:0006719 // juvenile hormone catabolic process // inferred from direc	NM_001169695 // GO:0005739 // mitochondrion // inferred from direct assay /// NM_00129	NM_001169695 // GO:0004453 // juvenile-hormone esterase activity // inferred from direc	0.106273	0.0281171	1.1279	1.1279	-17 days up vs -24 days	2.53365	0.0696512	0.0687262	1
12109	18197656	NM_142242 // Pbp45 // PSEA-binding protein 45kD // 89A5-89A5 // 41920 /// FBtr0083190 /	Pbp45	NM_142242	NM_142242 // GO:0042795 // snRNA transcription from RNA polymerase II promoter // infer	NM_142242 // GO:0019185 // snRNA-activating protein complex // inferred from direct ass	NM_142242 // GO:0003677 // DNA binding // inferred from direct assay /// NM_142242 //	0.00251305	0.00146315	1.12741	1.12741	-17 days up vs -24 days	8.8752	0.0845672	0.0238212	1
6310	18164665	NR_133127 // CR43104 // ncRNA // 53D5-53D5 // 26067096 /// NR_133128 // CR43104 // ncRN	CR43104	NR_133127	---	---	---	0.0508713	0.0139305	1.12713	1.12713	-17 days up vs -24 days	3.45496	0.06983	0.0505289	1
893	18134027	NM_001298771 // Caper // CG11266 gene product from transcript CG11266-RK // 27D5-27D5 /	Caper	NM_001298771	NM_001298771 // GO:0000381 // regulation of alternative mRNA splicing, via spliceosome	NM_001298771 // GO:0005634 // nucleus // inferred by curator /// NM_001298771 // GO:00	NM_001298771 // GO:0000166 // nucleotide binding // inferred from electronic annotation	0.18073	0.034051	1.12684	1.12684	-17 days up vs -24 days	1.93707	0.0573084	0.0739626	1
12661	18200568	NM_143636 // betaGlu // beta glucuronidase // 100D2-100F5 // 43746 /// FBtr0085858 // b	betaGlu	NM_143636	NM_143636 // GO:0005975 // carbohydrate metabolic process // inferred from electronic a	NM_143636 // GO:0031224 // intrinsic component of membrane // inferred from direct assa	NM_143636 // GO:0004566 // beta-glucuronidase activity // inferred from direct assay /	0.00231986	0.0276914	1.12679	1.12679	-17 days up vs -24 days	9.06723	0.243505	0.0671387	1
10287	18186886	NM_142437 // Non3 // Novel nucleolar protein 3 // 90F8-90F8 // 42183 /// FBtr0083562 //	Non3	NM_142437	NM_142437 // GO:0022008 // neurogenesis // inferred from mutant phenotype /// NM_14243	NM_142437 // GO:0005730 // nucleolus // inferred from direct assay /// NM_142437 // GO	NM_142437 // GO:0003674 // molecular_function // no biological data available /// NM_1	0.202841	0.0424764	1.12668	1.12668	-17 days up vs -24 days	1.81363	0.0596532	0.082229	1
12325	18198827	NM_001275917 // CCAP // Crustacean cardioactive peptide // 94C1-94C1 // 42683 /// NM_14	CCAP	NM_001275917	NM_001275917 // GO:0007218 // neuropeptide signaling pathway // inferred from direct as	NM_001275917 // GO:0005576 // extracellular region // inferred from sequence or structu	NM_001275917 // GO:0005184 // neuropeptide hormone activity // inferred from sequence o	0.144348	0.0466133	1.12667	1.12667	-17 days up vs -24 days	2.18355	0.0753076	0.0862216	1
3157	18146382	NM_001014480 // dpr2 // defective proboscis extension response 2 // 32B4-32C1 // 334622	dpr2	NM_001014480	NM_001014480 // GO:0007606 // sensory perception of chemical stimulus // inferred from	NM_001014480 // GO:0005575 // cellular_component // no biological data available /// N	NM_001014480 // GO:0003674 // molecular_function // no biological data available /// N	0.201714	0.0400616	1.12624	1.12624	-17 days up vs -24 days	1.81955	0.0577425	0.0793363	1
4344	18153155	NM_144451 // CG16741 // CG16741 gene product from transcript CG16741-RA // 56F17-56F17	CG16741	NM_144451	---	---	---	0.0849644	0.0468607	1.12619	1.12619	-17 days up vs -24 days	2.80102	0.0961788	0.0858425	1
8307	18176194	NM_139560 // CG14971 // CG14971 gene product from transcript CG14971-RA // 63E1-63E2 //	CG14971	NM_139560	NM_139560 // GO:0015786 // UDP-glucose transport // --- /// NM_139560 // GO:0098656 //	NM_139560 // GO:0000138 // Golgi trans cisterna // inferred from direct assay /// NM_1	NM_139560 // GO:0015297 // antiporter activity // --- /// FBtr0073143 // GO:0015297 //	0.11879	0.0410794	1.12551	1.12551	-17 days up vs -24 days	2.40432	0.0764192	0.0794603	1
2227	18141278	NM_134818 // Send1 // Spermathecal endopeptidase 1 // 22D5-22D5 // 33407 /// FBtr007780	Send1	NM_134818	NM_134818 // GO:0006508 // proteolysis // inferred from electronic annotation /// NM_1	NM_134818 // GO:0005737 // cytoplasm // --- /// FBtr0077804 // GO:0005737 // cytoplasm	NM_134818 // GO:0004252 // serine-type endopeptidase activity // inferred from electron	0.178896	0.0456262	1.12543	1.12543	-17 days up vs -24 days	1.94808	0.0652251	0.0837044	1
8502	18177236	NM_140068 // pall // pallbearer // 67B10-67B10 // 39104 /// FBtr0076471 // pall // pall	pall	NM_140068	NM_140068 // GO:0031146 // SCF-dependent proteasomal ubiquitin-dependent protein catabo	NM_140068 // GO:0019005 // SCF ubiquitin ligase complex // not recorded /// NM_140068	NM_140068 // GO:0004842 // ubiquitin-protein transferase activity // not recorded ///	0.0374129	0.0170012	1.12421	1.12421	-17 days up vs -24 days	3.87687	0.0812216	0.0523757	1
14893	18213664	NM_131957 // Bteb2 // CG2932 gene product from transcript CG2932-RA // 4D1-4D1 // 31410	Bteb2	NM_131957	NM_131957 // GO:0010272 // response to silver ion // inferred from mutant phenotype //	NM_131957 // GO:0005634 // nucleus // inferred from sequence or structural similarity	NM_131957 // GO:0043565 // sequence-specific DNA binding // inferred from direct assay	0.0239522	0.0416336	1.12417	1.12417	-17 days up vs -24 days	4.53384	0.142165	0.0783911	1
3563	18148843	NM_079037 // JhI-26 // Juvenile hormone-inducible protein 26 // 53B1-53B1 // 36819 ///	JhI-26	NM_079037	NM_079037 // GO:0045924 // regulation of female receptivity // inferred from mutant phe	NM_079037 // GO:0005575 // cellular_component // no biological data available /// FBtr	NM_079037 // GO:0003674 // molecular_function // no biological data available /// NM_0	0.0168682	0.0247637	1.12379	1.12379	-17 days up vs -24 days	5.09084	0.124304	0.0610432	1
1540	18137302	NM_001038785 // CG44001 // CG44001 gene product from transcript CG44001-RA // 25C1-25C1	CG44001	NM_001038785	NM_001038785 // GO:0008150 // biological_process // no biological data available /// N	NM_001038785 // GO:0005575 // cellular_component // no biological data available /// N	NM_001038785 // GO:0003674 // molecular_function // no biological data available /// N	0.00835843	0.030208	1.1219	1.1219	-17 days up vs -24 days	6.32589	0.164143	0.0648694	1
12617	18200391	NM_001170307 // CG2246 // CG2246 gene product from transcript CG2246-RK // 99F10-100A1	CG2246	NM_001170307	NM_001170307 // GO:0009165 // nucleotide biosynthetic process // inferred from electron	---	NM_001170307 // GO:0000287 // magnesium ion binding // inferred from electronic annotat	0.0938053	0.0113352	1.12178	1.12178	-17 days up vs -24 days	2.68149	0.0461452	0.043022	1
366	18130906	NM_078844 // l(2)35Bd // lethal (2) 35Bd // 35B8-35B8 // 34877 /// FBtr0080696 // l(2)3	l(2)35Bd	NM_078844	NM_078844 // GO:0006370 // 7-methylguanosine mRNA capping // inferred from sequence or	NM_078844 // GO:0005634 // nucleus // inferred from sequence or structural similarity	NM_078844 // GO:0003723 // RNA binding // inferred from sequence or structural similari	0.137832	0.034577	1.12089	1.12089	-17 days up vs -24 days	2.23526	0.0608326	0.0680374	1
14546	18211511	NM_001014752 // CoRest // CG42687 gene product from transcript CG42687-RC // 18C8-18C8	CoRest	NM_001014752	NM_001014752 // GO:0000122 // negative regulation of transcription from RNA polymerase	NM_001014752 // GO:0005634 // nucleus // inferred from direct assay /// NM_001014752 /	NM_001014752 // GO:0003677 // DNA binding // inferred from electronic annotation /// N	0.0780283	0.0306003	1.1207	1.1207	-17 days up vs -24 days	2.90551	0.0744312	0.0640431	1
13199	18203651	NR_048412 // iab-8 // iab-8 non-coding RNA // 89E4-89E4 // 12798430 /// NR_048413 // ia	iab-8	NR_048412	---	JN211048 // GO:0016020 // membrane // inferred from electronic annotation /// JN211048	---	0.137899	0.0410547	1.12068	1.12068	-17 days up vs -24 days	2.23471	0.0659357	0.0737631	1
12016	18197144	NM_141999 // CG7966 // CG7966 gene product from transcript CG7966-RA // 87D10-87D10 //	CG7966	NM_141999	---	---	NM_141999 // GO:0008430 // selenium binding // inferred from sequence or structural sim	0.0100552	0.0192391	1.12053	1.12053	-17 days up vs -24 days	5.98434	0.124663	0.0520789	1
6410	18165162	NM_001015316 // CG17514 // CG17514 gene product from transcript CG17514-RA // --- // 33	CG17514	NM_001015316	---	---	NM_001015316 // GO:0008494 // translation activator activity // inferred from sequence	0.164044	0.0348227	1.12034	1.12034	-17 days up vs -24 days	2.04227	0.0552985	0.0676924	1
13285	18204397	NM_001258475 // RpS3A // Ribosomal protein S3A // 101F1-101F1 // 43768 /// NM_079879 //	RpS3A	NM_001258475	NM_001258475 // GO:0000022 // mitotic spindle elongation // inferred from mutant phenot	NM_001258475 // GO:0022626 // cytosolic ribosome // non-traceable author statement ///	NM_001258475 // GO:0003735 // structural constituent of ribosome // inferred from seque	0.0436132	0.0331838	1.119	1.119	-17 days up vs -24 days	3.66333	0.0949096	0.06477	1
14194	18209346	NM_132906 // CG13014 // CG13014 gene product from transcript CG13014-RA // 14F1-14F1 //	CG13014	NM_132906	---	NM_132906 // GO:0016020 // membrane // inferred from electronic annotation /// NM_1329	---	0.0143205	0.013675	1.11878	1.11878	-17 days up vs -24 days	5.36404	0.0946606	0.0441181	1
8229	18175790	NM_001274323 // CG2199 // CG2199 gene product from transcript CG2199-RB // 61F7-61F7 //	CG2199	NM_001274323	NM_001274323 // GO:0006351 // transcription, DNA-templated // inferred from electronic	NM_001274323 // GO:0005634 // nucleus // inferred from electronic annotation /// NM_13	NM_001274323 // GO:0003676 // nucleic acid binding // inferred from electronic annotati	0.014751	0.00444652	1.1182	1.1182	-17 days up vs -24 days	5.31397	0.0621019	0.0292163	1
328	18130670	NM_001169492 // aret // arrest // 33D3-33D5 // 34648 /// NM_001273474 // aret // arrest	aret	NM_001169492	NM_001169492 // GO:0000381 // regulation of alternative mRNA splicing, via spliceosome	NM_001169492 // GO:0005634 // nucleus // inferred by curator /// NM_001169492 // GO:00	NM_001169492 // GO:0000166 // nucleotide binding // inferred from electronic annotation	0.0339814	0.0476573	1.11728	1.11728	-17 days up vs -24 days	4.01398	0.121087	0.0754157	1
10945	18190600	NM_001275680 // pxb // CG33207 gene product from transcript CG33207-RC // 89A1-89A2 //	pxb	NM_001275680	NM_001275680 // GO:0002121 // inter-male aggressive behavior // inferred from mutant ph	NM_001275680 // GO:0016020 // membrane // inferred from electronic annotation /// NM_0	---	0.142917	0.0391034	1.11708	1.11708	-17 days up vs -24 days	2.19467	0.0596823	0.0679857	1
11310	18192828	NM_001170161 // abd-A // abdominal A // 89E2-89E2|3-58.8 cM // 42037 /// NM_001260216 /	abd-A	NM_001170161	NM_001170161 // GO:0006355 // regulation of transcription, DNA-templated // inferred fr	NM_001170161 // GO:0005634 // nucleus // inferred from direct assay /// NM_001170161 /	NM_001170161 // GO:0003700 // transcription factor activity, sequence-specific DNA bind	0.170006	0.0411155	1.11657	1.11657	-17 days up vs -24 days	2.00333	0.0553931	0.0691264	1
8846	18179020	NM_001275157 // sNPF-R // short neuropeptide F receptor // 76E2-76E4 // 40195 /// NM_07	sNPF-R	NM_001275157	NM_001275157 // GO:0007186 // G-protein coupled receptor signaling pathway // inferred	NM_001275157 // GO:0005887 // integral component of plasma membrane // inferred from di	NM_001275157 // GO:0004930 // G-protein coupled receptor activity // inferred from sequ	0.195239	0.0479564	1.11443	1.11443	-17 days up vs -24 days	1.85427	0.0535608	0.072213	1
3977	18151208	NM_137369 // CG10764 // CG10764 gene product from transcript CG10764-RA // 54B16-54B16	CG10764	NM_137369	NM_137369 // GO:0006508 // proteolysis // inferred from electronic annotation /// NM_1	---	NM_137369 // GO:0004252 // serine-type endopeptidase activity // not recorded /// NM_1	0.0727581	0.0458983	1.11435	1.11435	-17 days up vs -24 days	2.99249	0.0843817	0.0704945	1
10303	18186955	NM_142499 // CG14297 // CG14297 gene product from transcript CG14297-RA // 91D4-91D4 //	CG14297	NM_142499	NM_142499 // GO:0006470 // protein dephosphorylation // inferred from sequence or struc	NM_142499 // GO:0005634 // nucleus // inferred from sequence or structural similarity	NM_142499 // GO:0004725 // protein tyrosine phosphatase activity // inferred from seque	0.0262137	0.0416455	1.11429	1.11429	-17 days up vs -24 days	4.39644	0.117854	0.0670166	1
7743	18172547	NM_168534 // RpS12 // Ribosomal protein S12 // 69F5-69F5 // 39480 /// FBtr0075878 // Rp	RpS12	NM_168534	NM_168534 // GO:0006412 // translation // inferred from sequence or structural similari	NM_168534 // GO:0005840 // ribosome // non-traceable author statement /// NM_168534 //	NM_168534 // GO:0003735 // structural constituent of ribosome // inferred from sequence	0.0527084	0.0396004	1.11411	1.11411	-17 days up vs -24 days	3.40776	0.088822	0.0651615	1
14409	18210515	NM_001298246 // CG32642 // CG32642 gene product from transcript CG32642-RE // 11D5-11D5	CG32642	NM_001298246	NM_001298246 // GO:0007304 // chorion-containing eggshell formation // inferred from ex	NM_001298246 // GO:0042600 // chorion // inferred by curator /// NM_167343 // GO:00426	---	0.000210707	0.0472539	1.11374	1.11374	-17 days up vs -24 days	16.4997	0.467524	0.0708383	1
6559	18166096	NM_176365 // Nca // Neurocalcin // 76D8-76D8 // 40186 /// FBtr0074902 // Nca // Neuroca	Nca	NM_176365	NM_176365 // GO:0042326 // negative regulation of phosphorylation // non-traceable auth	---	NM_176365 // GO:0005509 // calcium ion binding // inferred from direct assay /// NM_17	0.0835299	0.0237279	1.11309	1.11309	-17 days up vs -24 days	2.82179	0.0569934	0.050494	1
848	18133806	NM_001258970 // CG12511 // CG12511 gene product from transcript CG12511-RD // 25F2-25F2	CG12511	NM_001258970	NM_001258970 // GO:0000422 // mitophagy // --- /// NM_001298704 // GO:0000422 // mitoph	NM_001258970 // GO:0016020 // membrane // inferred from electronic annotation /// NM_0	---	0.173568	0.0302943	1.11305	1.11305	-17 days up vs -24 days	1.9808	0.044617	0.0563118	1
11097	18191510	NM_001260095 // cwo // clockwork orange // 86B3-86B3 // 44669 /// NM_001260096 // cwo /	cwo	NM_001260095	NM_001260095 // GO:0000122 // negative regulation of transcription from RNA polymerase	NM_001260095 // GO:0005634 // nucleus // inferred from direct assay /// NM_001260095 /	NM_001260095 // GO:0003677 // DNA binding // inferred from electronic annotation /// N	0.0252704	0.0361502	1.11197	1.11197	-17 days up vs -24 days	4.45196	0.107054	0.0601164	1
3565	18148850	NM_001273869 // sut3 // sugar transporter 3 // 44A4-44A4 // 44268 /// NM_079992 // sut3	sut3	NM_001273869	NM_001273869 // GO:0055085 // transmembrane transport // inferred from electronic annot	NM_001273869 // GO:0016021 // integral component of membrane // inferred from electroni	NM_001273869 // GO:0005351 // sugar:proton symporter activity // inferred from sequence	0.00423128	0.00352675	1.11156	1.11156	-17 days up vs -24 days	7.69582	0.0747249	0.0242745	1
12427	18199449	NM_143073 // veli // CG7662 gene product from transcript CG7662-RA // 96B19-96B19 // 43	veli	NM_143073	NM_143073 // GO:0007163 // establishment or maintenance of cell polarity // non-traceab	NM_143073 // GO:0035003 // subapical complex // inferred from direct assay /// NM_1430	FBtr0084787 // GO:0005515 // protein binding // inferred from electronic annotation //	0.13862	0.0338016	1.11025	1.11025	-17 days up vs -24 days	2.22885	0.050398	0.0565291	1
8747	18178486	NM_079399 // Or74a // Odorant receptor 74a // 74A4-74A4 // 39929 /// FBtr0075247 // Or7	Or74a	NM_079399	NM_079399 // GO:0007608 // sensory perception of smell // inferred from sequence or str	NM_079399 // GO:0016021 // integral component of membrane // inferred from sequence or	NM_079399 // GO:0004984 // olfactory receptor activity // inferred from electronic anno	0.00702521	0.0214877	1.10959	1.10959	-17 days up vs -24 days	6.65842	0.121368	0.0455695	1
15077	18214624	NM_132201 // CG15332 // CG15332 gene product from transcript CG15332-RA // 7D1-7D1 // 3	CG15332	NM_132201	NM_132201 // GO:0008150 // biological_process // no biological data available /// FBtr	NM_132201 // GO:0005575 // cellular_component // no biological data available /// FBtr	NM_132201 // GO:0003674 // molecular_function // no biological data available /// FBtr	0.0352595	0.023906	1.10948	1.10948	-17 days up vs -24 days	3.96106	0.0754686	0.0476315	1
11439	18193774	NM_001300340 // tws // twins // 85F13-85F14 // 47877 /// NM_057532 // tws // twins // 8	tws	NM_001300340	NM_001300340 // GO:0000278 // mitotic cell cycle // inferred from mutant phenotype ///	NM_001300340 // GO:0000159 // protein phosphatase type 2A complex // inferred from sequ	NM_001300340 // GO:0004722 // protein serine/threonine phosphatase activity // inferred	0.0394449	0.00448021	1.10886	1.10886	-17 days up vs -24 days	3.80253	0.0381096	0.0250554	1
14801	18213032	NM_057786 // RpL22 // Ribosomal protein L22 // 1C4-1C4 // 31022 /// FBtr0070148 // RpL2	RpL22	NM_057786	NM_057786 // GO:0000022 // mitotic spindle elongation // inferred from mutant phenotype	NM_057786 // GO:0005840 // ribosome // inferred from direct assay /// NM_057786 // GO:	NM_057786 // GO:0003735 // structural constituent of ribosome // inferred from direct a	0.0455272	0.00698325	1.10844	1.10844	-17 days up vs -24 days	3.6046	0.0417241	0.0289381	1
2183	18141045	NM_001272892 // CG4213 // CG4213 gene product from transcript CG4213-RA // 21C2-21C2 //	CG4213	NM_001272892	---	---	---	0.00608699	0.0470111	1.10797	1.10797	-17 days up vs -24 days	6.94137	0.177704	0.0640018	1
14535	18211385	NM_001144723 // inaE // inactivation no afterpotential E // 12C4-12C5 // 32343 /// NM_0	inaE	NM_001144723	NM_001144723 // GO:0006629 // lipid metabolic process // inferred from electronic annot	NM_001144723 // GO:0005737 // cytoplasm // inferred from direct assay /// NM_001144723	NM_001144723 // GO:0004465 // lipoprotein lipase activity // inferred from direct assay	0.287577	0.0486855	1.10751	1.10751	-17 days up vs -24 days	1.45136	0.0375362	0.0646568	1
14952	18214018	NM_001298446 // Ankle2 // ANKLE2 ortholog // 16B5-16B6 // 32732 /// NM_132993 // Ankle2	Ankle2	NM_001298446	NM_001298446 // GO:0000902 // cell morphogenesis // inferred from mutant phenotype ///	NM_001298446 // GO:0005737 // cytoplasm // inferred from direct assay /// NM_001298446	NM_001298446 // GO:0051721 // protein phosphatase 2A binding // --- /// NM_132993 // GO	0.0290876	0.0286098	1.10744	1.10744	-17 days up vs -24 days	4.24088	0.0844849	0.0498038	1
1167	18135504	NM_136078 // Tango6 // Transport and Golgi organization 6 // 37B7-37B8 // 35155 /// FBt	Tango6	NM_136078	NM_136078 // GO:0007030 // Golgi organization // inferred from mutant phenotype /// NM	NM_136078 // GO:0005794 // Golgi apparatus // inferred from direct assay /// NM_136078	FBtr0081133 // GO:0005488 // binding // inferred from electronic annotation /// FBtr00	0.0400253	0.0459461	1.10693	1.10693	-17 days up vs -24 days	3.78213	0.0939394	0.0620942	1
13277	18204311	NM_001038718 // Mitf // CG43369 gene product from transcript CG43369-RA // 102F8-102F8	Mitf	NM_001038718	NM_001038718 // GO:0001745 // compound eye morphogenesis // inferred from mutant phenot	---	NM_001038718 // GO:0046983 // protein dimerization activity // inferred from electronic	0.0413918	0.0222636	1.10689	1.10689	-17 days up vs -24 days	3.73545	0.0659371	0.0441293	1
3118	18146185	NM_001169529 // dl // dorsal // 36C8-36C9|2-52.9 cM // 35047 /// NM_001169530 // dl //	dl	NM_001169529	NM_001169529 // GO:0000122 // negative regulation of transcription from RNA polymerase	NM_001169529 // GO:0005634 // nucleus // inferred by curator /// NM_001169529 // GO:00	NM_001169529 // GO:0000977 // RNA polymerase II regulatory region sequence-specific DNA	0.0673427	0.0456654	1.10629	1.10629	-17 days up vs -24 days	3.08995	0.0756346	0.0611939	1
13168	18203516	NR_048450 // CR43372 // ncRNA // 93E4-93E4 // 12798502	CR43372	NR_048450	---	---	---	0.166749	0.0341645	1.1062	1.1062	-17 days up vs -24 days	2.02441	0.0428521	0.0529193	1
3457	18148109	NR_001718 // snoRNA:Me28S-A1322 // ncRNA // 48C5-48C5 // 3772621	snoRNA:Me28S-A1322	NR_001718	---	NR_001718 // GO:0005730 // nucleolus // non-traceable author statement	NR_001718 // GO:0030555 // RNA modification guide activity // non-traceable author stat	0.00823358	0.0179543	1.10615	1.10615	-17 days up vs -24 days	6.35425	0.101075	0.0397667	1
1770	18138502	NM_001259095 // CG43376 // CG43376 gene product from transcript CG43376-RA // 34D1-34D1	CG43376	NM_001259095	NM_001259095 // GO:0008150 // biological_process // no biological data available /// F	NM_001259095 // GO:0005575 // cellular_component // no biological data available /// F	NM_001259095 // GO:0003674 // molecular_function // no biological data available /// F	0.00112227	0.0255059	1.10573	1.10573	-17 days up vs -24 days	10.9568	0.201017	0.0458659	1
2716	18144022	NM_001299161 // fbp // fructose-1,6-bisphosphatase // 38A2-38A3 // 35265 /// NM_0012991	fbp	NM_001299161	NM_001299161 // GO:0005975 // carbohydrate metabolic process // inferred from electroni	---	NM_001299161 // GO:0042132 // fructose 1,6-bisphosphate 1-phosphatase activity // infer	0.00514677	0.0333268	1.1057	1.1057	-17 days up vs -24 days	7.28279	0.150983	0.0518286	1
15840	18218620	NR_047863 // mir-2491 // mir-2491 stem loop // 20E2-20E2 // 12798220	mir-2491	NR_047863	---	---	---	0.0860006	0.0461581	1.10449	1.10449	-17 days up vs -24 days	2.78628	0.0663885	0.0595674	1
9008	18179807	NM_168402 // CG32055 // CG32055 gene product from transcript CG32055-RA // 67D11-67D11	CG32055	NM_168402	---	NM_168402 // GO:0016942 // insulin-like growth factor binding protein complex // inferr	NM_168402 // GO:0005520 // insulin-like growth factor binding // inferred from sequence	0.0695374	0.0417556	1.10353	1.10353	-17 days up vs -24 days	3.04938	0.067841	0.0556186	1
7098	18169271	NM_001274896 // CG8100 // CG8100 gene product from transcript CG8100-RC // 70D2-70D2 //	CG8100	NM_001274896	---	NM_001274896 // GO:0005576 // extracellular region // inferred from sequence or structu	---	0.154155	0.0251347	1.1026	1.1026	-17 days up vs -24 days	2.1106	0.0363372	0.0430413	1
771	18133402	NM_001273054 // CG17260 // CG17260 gene product from transcript CG17260-RC // 23C5-23C5	CG17260	NM_001273054	NM_001273054 // GO:0008150 // biological_process // no biological data available /// N	NM_001273054 // GO:0005575 // cellular_component // no biological data available /// N	NM_001273054 // GO:0008270 // zinc ion binding // inferred from electronic annotation	0.143668	0.048583	1.09834	1.09834	-17 days up vs -24 days	2.18882	0.0477176	0.0545015	1
497	18131781	NM_001258887 // spen // split ends // 21B3-21B4 // 44205 /// NM_001272873 // spen // sp	spen	NM_001258887	NM_001258887 // GO:0006355 // regulation of transcription, DNA-templated // inferred fr	NM_001258887 // GO:0005634 // nucleus // inferred from direct assay /// NM_001258887 /	NM_001258887 // GO:0000166 // nucleotide binding // inferred from electronic annotation	0.065853	0.0165483	1.09828	1.09828	-17 days up vs -24 days	3.11839	0.0414251	0.0332103	1
12323	18198816	NM_142806 // CG5278 // CG5278 gene product from transcript CG5278-RA // 94B4-94B4 // 42	CG5278	NM_142806	NM_142806 // GO:0030497 // fatty acid elongation // inferred from sequence or structura	NM_142806 // GO:0016021 // integral component of membrane // inferred from electronic a	NM_142806 // GO:0009922 // fatty acid elongase activity // inferred from sequence or st	0.00208553	0.019631	1.09747	1.09747	-17 days up vs -24 days	9.32763	0.130883	0.0350794	1
3692	18149581	NM_001299290 // PAN2 // PAN2 ortholog (S. cerevisiae) // 44F8-44F9 // 35893 /// NM_1365	PAN2	NM_001299290	NM_001299290 // GO:0000289 // nuclear-transcribed mRNA poly(A) tail shortening // infer	NM_001299290 // GO:0031251 // PAN complex // inferred from electronic annotation /// N	NM_001299290 // GO:0003676 // nucleic acid binding // inferred from electronic annotati	0.000303303	0.00100879	1.0974	1.0974	-17 days up vs -24 days	15.1308	0.0777791	0.0128511	1
16254	18220074	---		---	---	---	---	0.027197	0.0171548	1.09702	1.09702	-17 days up vs -24 days	4.34102	0.0571001	0.032884	1
12402	18199289	NM_142997 // CG17784 // CG17784 gene product from transcript CG17784-RA // 95F15-95F15	CG17784	NM_142997	---	---	---	0.0837932	0.0355763	1.09258	1.09258	-17 days up vs -24 days	2.81795	0.0467971	0.041517	1
14510	18211232	NM_001169206 // CG42449 // CG42449 gene product from transcript CG42449-RB // 5A12-5A12	CG42449	NM_001169206	---	---	---	0.135003	0.0266289	1.09049	1.09049	-17 days up vs -24 days	2.2586	0.0313834	0.0347377	1
6328	18164745	NM_001259552 // CG43209 // CG43209 gene product from transcript CG43209-RA // 59F4-59F4	CG43209	NM_001259552	NM_001259552 // GO:0008150 // biological_process // no biological data available /// F	NM_001259552 // GO:0005575 // cellular_component // no biological data available /// F	NM_001259552 // GO:0003674 // molecular_function // no biological data available /// F	0.00741315	0.00699914	1.08994	1.08994	-17 days up vs -24 days	6.55435	0.0531264	0.0202638	1
532	18132069	NM_001298661 // drm // drumstick // 24A1-24A1 // 49638 /// NM_080527 // drm // drumstic	drm	NM_001298661	NM_001298661 // GO:0000122 // negative regulation of transcription from RNA polymerase	NM_001298661 // GO:0005634 // nucleus // inferred from electronic annotation /// NM_08	NM_001298661 // GO:0003676 // nucleic acid binding // inferred from electronic annotati	0.019266	0.0308508	1.08978	1.08978	-17 days up vs -24 days	4.8753	0.0713604	0.0365928	1
6914	18168326	NM_139928 // MED24 // Mediator complex subunit 24 // 66B11-66B12|3-34 cM // 38914 /// F	MED24	NM_139928	NM_139928 // GO:0006366 // transcription from RNA polymerase II promoter // inferred fr	NM_139928 // GO:0005634 // nucleus // inferred from sequence or structural similarity	NM_139928 // GO:0001104 // RNA polymerase II transcription cofactor activity // inferre	0.00746551	0.0388582	1.08714	1.08714	-17 days up vs -24 days	6.54081	0.100971	0.0385928	1
11450	18193850	NM_001144620 // lbl // ladybird late // 93E1-93E1 // 42541 /// NM_001275876 // lbl // l	lbl	NM_001144620	NM_001144620 // GO:0006355 // regulation of transcription, DNA-templated // inferred fr	NM_001144620 // GO:0005634 // nucleus // inferred from direct assay /// NM_001144620 /	NM_001144620 // GO:0003700 // transcription factor activity, sequence-specific DNA bind	0.152219	0.0497575	1.086	1.086	-17 days up vs -24 days	2.12457	0.0362857	0.0426977	1
1734	18138315	NR_047916 // mir-275 // mir-275 stem loop // 27F4-27F4 // 12798299 /// NR_073735 // CR4	mir-275	NR_047916	---	---	---	0.193437	0.037309	1.0855	1.0855	-17 days up vs -24 days	1.86416	0.0271996	0.036477	1
12707	18200791	NM_144391 // CG18745 // CG18745 gene product from transcript CG18745-RA // 84E1-84E1 //	CG18745	NM_144391	---	---	---	0.00950271	0.006178	1.08422	1.08422	-17 days up vs -24 days	6.08748	0.0416461	0.0171032	1
16034	18219483	---		---	---	---	---	0.000768651	0.0127975	1.08314	1.08314	-17 days up vs -24 days	12.0548	0.104973	0.02177	1
11639	18194992	NM_079855 // PH4alphaMP // prolyl-4-hydroxylase-alpha MP // 99F6-99F6 // 43624 /// FBtr	PH4alphaMP	NM_079855	NM_079855 // GO:0018401 // peptidyl-proline hydroxylation to 4-hydroxy-L-proline // inf	NM_079855 // GO:0016222 // procollagen-proline 4-dioxygenase complex // inferred from s	NM_079855 // GO:0004656 // procollagen-proline 4-dioxygenase activity // inferred from	0.000367274	0.0471986	1.08006	1.08006	-17 days up vs -24 days	14.4505	0.209191	0.0361912	1
6044	18163054	NM_166593 // CG30413 // CG30413 gene product from transcript CG30413-RA // 59D6-59D6 //	CG30413	NM_166593	NM_166593 // GO:0008150 // biological_process // no biological data available /// FBtr	NM_166593 // GO:0005575 // cellular_component // no biological data available /// FBtr	NM_166593 // GO:0003674 // molecular_function // no biological data available /// FBtr	0.182673	0.0267481	1.07935	1.07935	-17 days up vs -24 days	1.92555	0.0208334	0.0270486	1
3412	18147828	NM_001169621 // babo // baboon // 44F11-44F12 // 35900 /// NM_057651 // babo // baboon	babo	NM_001169621	NM_001169621 // GO:0006468 // protein phosphorylation // inferred from sequence or stru	NM_001169621 // GO:0005886 // plasma membrane // non-traceable author statement /// NM	NM_001169621 // GO:0004672 // protein kinase activity // non-traceable author statement	0.0308493	0.0315185	1.07923	1.07923	-17 days up vs -24 days	4.1543	0.0483129	0.029074	1
4484	18153913	NM_165478 // Opbp // Optix-binding protein // 42C1-42C2 // 246618 /// FBtr0086109 // Op	Opbp	NM_165478	---	---	NM_165478 // GO:0003676 // nucleic acid binding // inferred from electronic annotation	0.0634611	0.0085078	1.07832	1.07832	-17 days up vs -24 days	3.16568	0.021091	0.016656	1
2220	18141236	NM_001272975 // CG4259 // CG4259 gene product from transcript CG4259-RB // 22C3-22C3 //	CG4259	NM_001272975	NM_001272975 // GO:0006508 // proteolysis // not recorded /// NM_001272975 // GO:00065	---	NM_001272975 // GO:0004252 // serine-type endopeptidase activity // not recorded /// N	0.00936742	0.0129472	1.06886	1.06886	-17 days up vs -24 days	6.11383	0.0371819	0.015204	1
7018	18168883	NM_140207 // CG7557 // CG7557 gene product from transcript CG7557-RA // 68C9-68C9 // 39	CG7557	NM_140207	---	NM_140207 // GO:0016020 // membrane // inferred from electronic annotation /// NM_1402	---	0.108894	0.0394186	1.06713	1.06713	-17 days up vs -24 days	2.50515	0.0235548	0.0235064	1
8343	18176403	NM_139654 // CG13722 // CG13722 gene product from transcript CG13722-RB // 64B8-64B9 //	CG13722	NM_139654	---	---	---	0.045268	0.0367087	1.06418	1.06418	-17 days up vs -24 days	3.61238	0.030068	0.020809	1
1279	18136139	NM_144103 // CG13946 // CG13946 gene product from transcript CG13946-RA // 21E2-21E2 //	CG13946	NM_144103	---	---	---	0.00278738	0.0487132	1.063	1.063	-17 days up vs -24 days	8.63093	0.0799396	0.023155	1
337	18130756	NM_001273743 // crc // cryptocephal // 39C2-39C3 // 47767 /// NM_001273744 // crc // cr	crc	NM_001273743	NM_001273743 // GO:0005991 // trehalose metabolic process // inferred from mutant pheno	NM_001273743 // GO:0005634 // nucleus // inferred from sequence or structural similarit	NM_001273743 // GO:0000980 // RNA polymerase II distal enhancer sequence-specific DNA b	0.0251721	0.0294302	1.06083	1.06083	-17 days up vs -24 days	4.4579	0.0301232	0.0168932	1
2754	18144219	NM_136250 // Nbr // Nibbler // 39A6-39A7 // 35385 /// FBtr0081499 // Nbr // Nibbler //	Nbr	NM_136250	NM_136250 // GO:0044747 // mature miRNA 3'-end processing // inferred from mutant pheno	NM_136250 // GO:0030529 // ribonucleoprotein complex // inferred from direct assay ///	NM_136250 // GO:0003676 // nucleic acid binding // inferred from electronic annotation	0.00264926	0.0489407	1.04692	1.04692	-17 days up vs -24 days	8.75012	0.0457579	0.0130735	1
6357	18164930	NR_048203 // CR43466 // ncRNA // 60E5-60E5 // 12797865	CR43466	NR_048203	---	---	---	0.0369348	0.0447916	0.964783	-1.0365	7 days down vs 0 days	3.89506	0.0118924	0.00763302	1
4538	18154162	NM_001032238 // CG33752 // CG33752 gene product from transcript CG33752-RA // 49B3-49B3	CG33752	NM_001032238	NM_001032238 // GO:0008150 // biological_process // no biological data available /// F	NM_001032238 // GO:0005575 // cellular_component // no biological data available /// F	NM_001032238 // GO:0003674 // molecular_function // no biological data available /// F	0.0354547	0.0377339	0.958147	-1.04368	-17 days down vs -24 days	3.95318	0.0157522	0.00996172	1
10730	18189381	NM_001276221 // pasha // partner of drosha // 100D1-100D1 // 43728 /// NM_001276222 //	pasha	NM_001276221	NM_001276221 // GO:0007294 // germarium-derived oocyte fate determination // inferred f	NM_001276221 // GO:0005634 // nucleus // inferred from direct assay /// NM_001276221 /	NM_001276221 // GO:0003725 // double-stranded RNA binding // inferred from sequence or	0.0122	0.0423663	0.950446	-1.05214	-17 days down vs -24 days	5.63992	0.033638	0.0149107	1
1710	18138257	NR_047902 // mir-962 // mir-962 stem loop // 25F2-25F2 // 12798566	mir-962	NR_047902	---	---	---	0.0799388	0.0113349	0.945185	-1.05799	-17 days down vs -24 days	2.87568	0.01191	0.0103541	1
10302	18186952	NM_001275787 // CG14298 // CG14298 gene product from transcript CG14298-RB // 91D3-91D3	CG14298	NM_001275787	NM_001275787 // GO:0010951 // negative regulation of endopeptidase activity // inferred	NM_001275787 // GO:0016020 // membrane // inferred from electronic annotation /// NM_0	NM_001275787 // GO:0004867 // serine-type endopeptidase inhibitor activity // inferred	0.148962	0.0386724	0.936329	-1.068	-17 days down vs -24 days	2.14853	0.0205175	0.0238739	1
464	18131563	NM_001298986 // Ance // Angiotensin converting enzyme // 34E2-34E2 // 34805 /// NM_0576	Ance	NM_001298986	NM_001298986 // GO:0006508 // proteolysis // inferred from direct assay /// NM_0012989	NM_001298986 // GO:0005576 // extracellular region // non-traceable author statement /	NM_001298986 // GO:0008237 // metallopeptidase activity // inferred from electronic ann	0.148838	0.0431356	0.935302	-1.06917	-17 days down vs -24 days	2.14946	0.0224066	0.0260608	1
5061	18157354	NM_001169694 // Ric // Ras-related protein interacting with calmodulin // 52E5-52E5 //	Ric	NM_001169694	NM_001169694 // GO:0006970 // response to osmotic stress // inferred from mutant phenot	NM_001169694 // GO:0005886 // plasma membrane // inferred from sequence or structural s	NM_001169694 // GO:0003924 // GTPase activity // inferred from sequence or structural s	0.0212306	0.0437617	0.930319	-1.0749	-17 days down vs -24 days	4.72125	0.0578143	0.0306139	1
6572	18166198	NM_140540 // Eig71Ek // CG7325 gene product from transcript CG7325-RA // 71E5-71E5 // 3	Eig71Ek	NM_140540	NM_140540 // GO:0007552 // metamorphosis // inferred from expression pattern /// NM_14	NM_140540 // GO:0005576 // extracellular region // not recorded /// NM_140540 // GO:00	---	0.00249562	0.0265798	0.928469	-1.07704	-17 days down vs -24 days	8.89178	0.0906183	0.0254781	1
9743	18184028	NM_079753 // cav // caravaggio // 95F2-95F2 // 42881 /// NM_170133 // cav // caravaggio	cav	NM_079753	NM_079753 // GO:0000723 // telomere maintenance // inferred from mutant phenotype ///	NM_079753 // GO:0000775 // chromosome, centromeric region // inferred from direct assay	NM_079753 // GO:0003696 // satellite DNA binding // non-traceable author statement ///	0.0207953	0.0300722	0.922743	-1.08373	-17 days down vs -24 days	4.75388	0.0601472	0.0316306	1
5215	18158484	NM_001259220 // CG17266 // CG17266 gene product from transcript CG17266-RA // 42C4-42C4	CG17266	NM_001259220	NM_001259220 // GO:0000398 // mRNA splicing, via spliceosome // inferred by curator //	NM_001259220 // GO:0005681 // spliceosomal complex // inferred from sequence or structu	NM_001259220 // GO:0003755 // peptidyl-prolyl cis-trans isomerase activity // inferred	0.0624569	0.0319161	0.920913	-1.08588	-17 days down vs -24 days	3.18616	0.0435159	0.0341445	1
2786	18144391	NM_078782 // Tep2 // Thioester-containing protein 2 // 28C1-28C1 // 34044 /// NM_164761	Tep2	NM_078782	NM_078782 // GO:0006909 // phagocytosis // inferred from mutant phenotype /// NM_07878	NM_078782 // GO:0005615 // extracellular space // inferred from electronic annotation	NM_078782 // GO:0004866 // endopeptidase inhibitor activity // inferred from electronic	0.0660273	0.0455385	0.920881	-1.08592	-17 days down vs -24 days	3.11503	0.0506983	0.0406885	1
8676	18178117	NM_079358 // Ran-like // CG7815 gene product from transcript CG7815-RA // 71D3-71D3 //	Ran-like	NM_079358	NM_079358 // GO:0006611 // protein export from nucleus // inferred from sequence or str	NM_079358 // GO:0005634 // nucleus // inferred from direct assay /// NM_079358 // GO:0	NM_079358 // GO:0003924 // GTPase activity // inferred from sequence or structural simi	0.000304005	0.00130795	0.920582	-1.08627	-17 days down vs -24 days	15.1224	0.0663973	0.0109766	1
9771	18184220	NM_058105 // CstF-64 // Cleavage stimulation factor 64 kilodalton subunit // 91B8-91B8	CstF-64	NM_058105	NM_058105 // GO:0006379 // mRNA cleavage // inferred from sequence or structural simila	NM_058105 // GO:0005848 // mRNA cleavage stimulating factor complex // inferred from se	NM_058105 // GO:0000166 // nucleotide binding // inferred from electronic annotation /	0.0319027	0.0114645	0.9199	-1.08707	-17 days down vs -24 days	4.10528	0.0374535	0.0228081	1
4034	18151512	NM_137539 // CG15084 // CG15084 gene product from transcript CG15084-RA // 55F7-55F7 //	CG15084	NM_137539	NM_137539 // GO:0008150 // biological_process // no biological data available /// FBtr	NM_137539 // GO:0005575 // cellular_component // no biological data available /// FBtr	NM_137539 // GO:0003674 // molecular_function // no biological data available /// FBtr	0.017382	0.0428212	0.91989	-1.08709	-17 days down vs -24 days	5.04169	0.0816085	0.0404668	1
4268	18152764	NM_138077 // CG13581 // CG13581 gene product from transcript CG13581-RA // 60D3-60D3 //	CG13581	NM_138077	---	---	---	0.0641756	0.0354521	0.918883	-1.08828	-17 days down vs -24 days	3.15133	0.0476979	0.0378395	1
12287	18198622	NM_142706 // CG3308 // CG3308 gene product from transcript CG3308-RA // 93D2-93D2 // 42	CG3308	NM_142706	---	---	NM_142706 // GO:0004536 // deoxyribonuclease activity // inferred from sequence or stru	0.225636	0.0306151	0.918573	-1.08864	-17 days down vs -24 days	1.70144	0.0242202	0.0355878	1
11346	18193106	NM_001202284 // kar // karmoisin // 87C5-87C5|3-51.7 cM // 45883 /// NM_143768 // kar /	kar	NM_001202284	NM_001202284 // GO:0006727 // ommochrome biosynthetic process // inferred from mutant p	NM_001202284 // GO:0005886 // plasma membrane // inferred from sequence or structural s	NM_001202284 // GO:0008028 // monocarboxylic acid transmembrane transporter activity //	0.0740072	0.0106909	0.918404	-1.08885	-17 days down vs -24 days	2.97122	0.0274408	0.0230888	1
2854	18144803	NM_164896 // mthl15 // methuselah-like 15 // 31B1-31B1 // 318914 /// NM_164897 // mthl1	mthl15	NM_164896	NM_164896 // GO:0006950 // response to stress // inferred from electronic annotation /	NM_164896 // GO:0005887 // integral component of plasma membrane // inferred from seque	NM_164896 // GO:0004930 // G-protein coupled receptor activity // inferred from sequenc	0.113385	0.0322246	0.916771	-1.09078	-17 days down vs -24 days	2.45812	0.0375148	0.038154	1
7095	18169258	NM_001259818 // CG6650 // CG6650 gene product from transcript CG6650-RA // 70C15-70C15	CG6650	NM_001259818	NM_001259818 // GO:0005975 // carbohydrate metabolic process // inferred from electroni	NM_001259818 // GO:0016020 // membrane // inferred from electronic annotation /// NM_0	NM_001259818 // GO:0016773 // phosphotransferase activity, alcohol group as acceptor //	0.182117	0.0478883	0.916356	-1.09128	-17 days down vs -24 days	1.92883	0.0361897	0.0469062	1
8861	18179097	NM_140945 // FRG1 // FSHD region gene 1 ortholog (H. sapiens) // 77B1-77B1 // 40228 ///	FRG1	NM_140945	NM_140945 // GO:0031936 // negative regulation of chromatin silencing // inferred from	NM_140945 // GO:0005575 // cellular_component // no biological data available /// NM_1	NM_140945 // GO:0003674 // molecular_function // no biological data available /// FBtr	0.0310296	0.0126382	0.916109	-1.09157	-17 days down vs -24 days	4.14577	0.0432423	0.0260762	1
4013	18151399	NM_137475 // IM1 // Immune induced molecule 1 // 55C4-55C4 // 37100 /// FBtr0086662 //	IM1	NM_137475	NM_137475 // GO:0006952 // defense response // inferred from direct assay /// NM_13747	NM_137475 // GO:0005576 // extracellular region // inferred from direct assay /// NM_1	---	0.0819008	0.0250942	0.916016	-1.09168	-17 days down vs -24 days	2.84589	0.0394909	0.0346911	1
7885	18173556	NR_048218 // CR43626 // ncRNA // 63C1-63C2 // 12798575 /// NR_124769 // CR43626 // ncRN	CR43626	NR_048218	---	---	---	0.0823011	0.0379145	0.915747	-1.092	-17 days down vs -24 days	2.83992	0.0480699	0.0423163	1
13193	18203639	NR_048405 // mir-4911 // mir-4911 stem loop // 89A5-89A5 // 12798423	mir-4911	NR_048405	---	---	---	0.00509722	0.00197141	0.915747	-1.092	-17 days down vs -24 days	7.30282	0.0409674	0.0140245	1
4666	18154617	NM_001103752 // CG34430 // CG34430 gene product from transcript CG34430-RA // 43F5-43F5	CG34430	NM_001103752	NM_001103752 // GO:0008150 // biological_process // no biological data available /// F	NM_001103752 // GO:0005575 // cellular_component // no biological data available /// N	NM_001103752 // GO:0003674 // molecular_function // no biological data available /// F	0.0371261	0.0177943	0.913367	-1.09485	-17 days down vs -24 days	3.88775	0.0497136	0.0319681	1
12445	18199522	NM_143127 // CG10560 // CG10560 gene product from transcript CG10560-RA // 96D1-96D1 //	CG10560	NM_143127	NM_143127 // GO:0008150 // biological_process // no biological data available /// NM_1	NM_143127 // GO:0005575 // cellular_component // no biological data available /// FBtr	NM_143127 // GO:0003674 // molecular_function // no biological data available /// NM_1	0.212002	0.0400519	0.913187	-1.09507	-17 days down vs -24 days	1.76691	0.0327136	0.0462866	1
13435	18205091	---		---	---	---	---	0.023846	0.00247022	0.911836	-1.09669	-17 days down vs -24 days	4.54067	0.0300102	0.016523	1
3369	18147500	NM_001299582 // Cbp53E // Calbindin 53E // 53E4-53E4 // 36905 /// NM_057490 // Cbp53E /	Cbp53E	NM_001299582	NM_001299582 // GO:0006874 // cellular calcium ion homeostasis // inferred from sequenc	NM_001299582 // GO:0005634 // nucleus // --- /// NM_001299582 // GO:0005829 // cytosol	NM_001299582 // GO:0005509 // calcium ion binding // inferred from sequence or structur	0.051584	0.0340421	0.90821	-1.10107	-17 days down vs -24 days	3.43641	0.0660753	0.04807	1
6445	18165374	NM_001031955 // gdl-ORF39 // CG33755 gene product from transcript CG33755-RA // 71D3-71	gdl-ORF39	NM_001031955	NM_001031955 // GO:0007283 // spermatogenesis // non-traceable author statement /// NM	NM_079359 // GO:0005737 // cytoplasm // inferred from direct assay /// NM_079359 // GO	NM_079359 // GO:0005515 // protein binding // inferred from physical interaction /// N	0.082965	0.0262642	0.908108	-1.10119	-17 days down vs -24 days	2.83009	0.0483899	0.0427459	1
6653	18166695	NM_001031955 // gdl-ORF39 // CG33755 gene product from transcript CG33755-RA // 71D3-71	gdl-ORF39	NM_001031955	NM_001031955 // GO:0007283 // spermatogenesis // non-traceable author statement /// NM	NM_079359 // GO:0005737 // cytoplasm // inferred from direct assay /// NM_079359 // GO	NM_079359 // GO:0005515 // protein binding // inferred from physical interaction /// N	0.082965	0.0262642	0.908108	-1.10119	-17 days down vs -24 days	2.83009	0.0483899	0.0427459	1
3800	18150223	NM_001299407 // CG13168 // CG13168 gene product from transcript CG13168-RC // 48F1-48F1	CG13168	NM_001299407	NM_001299407 // GO:0008150 // biological_process // no biological data available /// N	NM_001299407 // GO:0005575 // cellular_component // no biological data available /// N	NM_001299407 // GO:0003674 // molecular_function // no biological data available /// N	0.095184	0.0481079	0.906879	-1.10268	-17 days down vs -24 days	2.66404	0.0627385	0.0588754	1
11350	18193142	NM_001300333 // hyd // hyperplastic discs // 85E5-85E5|3-49.0 cM // 41181 /// NM_079572	hyd	NM_001300333	NM_001300333 // GO:0000209 // protein polyubiquitination // inferred from sequence or s	NM_001300333 // GO:0005634 // nucleus // inferred from direct assay /// NM_001300333 /	NM_001300333 // GO:0003723 // RNA binding // inferred from electronic annotation /// N	0.0639756	0.0166255	0.905651	-1.10418	-17 days down vs -24 days	3.15533	0.0469336	0.037186	1
16240	18220018	---		---	---	---	---	0.145941	0.0335464	0.905445	-1.10443	-17 days down vs -24 days	2.17132	0.0441275	0.0508073	1
12510	18199823	NM_001043297 // CG3339 // CG3339 gene product from transcript CG3339-RC // 97F1-97F2 //	CG3339	NM_001043297	NM_001043297 // GO:0007018 // microtubule-based movement // inferred from electronic an	NM_001043297 // GO:0005868 // cytoplasmic dynein complex // inferred from sequence or s	NM_001043297 // GO:0003774 // motor activity // inferred from sequence or structural si	0.124487	0.0322615	0.904952	-1.10503	-17 days down vs -24 days	2.35061	0.0474141	0.0504274	1
1169	18135512	NM_136082 // CG15168 // CG15168 gene product from transcript CG15168-RA // 37B8-37B8 //	CG15168	NM_136082	---	NM_136082 // GO:0016020 // membrane // inferred from electronic annotation /// NM_1360	---	0.042866	0.0347244	0.904538	-1.10554	-17 days down vs -24 days	3.6871	0.077719	0.0526966	1
3195	18146544	NM_001298874 // Mdh1 // Malate dehydrogenase 1 // 31E1-31F2|2-37.2 cM // 34414 /// NM_1	Mdh1	NM_001298874	NM_001298874 // GO:0005975 // carbohydrate metabolic process // inferred from electroni	NM_001298874 // GO:0005737 // cytoplasm // traceable author statement /// NM_001298874	NM_001298874 // GO:0030060 // L-malate dehydrogenase activity // inferred from direct a	0.169244	0.0341821	0.903935	-1.10627	-17 days down vs -24 days	2.00822	0.0425737	0.0529994	1
5906	18162384	NM_144142 // CG12158 // CG12158 gene product from transcript CG12158-RA // 45D1-45D1 //	CG12158	NM_144142	NM_144142 // GO:0022008 // neurogenesis // inferred from mutant phenotype /// FBtr0088	---	---	0.00110505	0.00986246	0.903599	-1.10669	-17 days down vs -24 days	11	0.139817	0.0317764	1
14068	18208675	NM_132577 // CG2556 // CG2556 gene product from transcript CG2556-RA // 11A12-11A12 //	CG2556	NM_132577	---	---	---	0.00399664	0.0463238	0.903347	-1.10699	-17 days down vs -24 days	7.81915	0.195259	0.0624297	1
10864	18190196	NM_001144596 // CG31266 // CG31266 gene product from transcript CG31266-RB // 89F1-89F1	CG31266	NM_001144596	NM_001144596 // GO:0006508 // proteolysis // not recorded /// NM_001144596 // GO:00065	NM_001144596 // GO:0005615 // extracellular space // --- /// FBtr0300060 // GO:0005615	NM_001144596 // GO:0004252 // serine-type endopeptidase activity // not recorded /// N	0.0110829	0.0170986	0.902553	-1.10797	-17 days down vs -24 days	5.80938	0.0935527	0.0402593	1
2785	18144374	NM_001273130 // hoe1 // hoepel1 // 25B3-25B3 // 249663 /// NM_001273131 // hoe1 // hoep	hoe1	NM_001273130	NM_001273130 // GO:0006810 // transport // inferred from sequence or structural similar	NM_001273130 // GO:0016020 // membrane // non-traceable author statement /// NM_001273	NM_001273130 // GO:0005215 // transporter activity // inferred from sequence or structu	0.0586404	0.00941898	0.902501	-1.10803	-17 days down vs -24 days	3.2677	0.0418199	0.0319949	1
11208	18192164	NR_002037 // iab-4 // ncRNA // 89E3-89E3 // 3772110 /// NR_048416 // mir-iab-4 // mir-i	iab-4	NR_002037	---	---	---	0.0309969	0.00358807	0.90181	-1.10888	-17 days down vs -24 days	4.14731	0.0386698	0.0233102	1
3031	18145586	NM_001103664 // CG34183 // CG34183 gene product from transcript CG34183-RA // 30E1-30E1	CG34183	NM_001103664	NM_001103664 // GO:0009301 // snRNA transcription // inferred from sequence or structur	NM_001103664 // GO:0005634 // nucleus // inferred from sequence or structural similarit	NM_001103664 // GO:0008420 // CTD phosphatase activity // inferred from sequence or str	0.0838259	0.032468	0.901466	-1.1093	-17 days down vs -24 days	2.81747	0.0614924	0.0545634	1
2090	18140506	NM_001169462 // Pten // Phosphatase and tensin homolog // 31B1-31B1 // 43991 /// NM_058	Pten	NM_001169462	NM_001169462 // GO:0002164 // larval development // inferred from mutant phenotype ///	NM_001169462 // GO:0005634 // nucleus // inferred from sequence or structural similarit	NM_001169462 // GO:0000287 // magnesium ion binding // inferred from electronic annotat	0.221303	0.0392793	0.901135	-1.10971	-17 days down vs -24 days	1.72175	0.0414852	0.0602368	1
1688	18138091	NM_057270 // LanB1 // CG7123 gene product from transcript CG7123-RA // 28C4-28D1 // 340	LanB1	NM_057270	NM_057270 // GO:0003143 // embryonic heart tube morphogenesis // inferred from mutant p	NM_057270 // GO:0005604 // basement membrane // inferred from direct assay /// NM_0572	FBtr0079490 // GO:0005515 // protein binding // inferred from electronic annotation //	0.0675658	0.0135374	0.900867	-1.11004	-17 days down vs -24 days	3.08576	0.0469298	0.0380212	1
2079	18140456	NM_001272884 // Amnionless // Amnionless ortholog // 21B7-21B7 // 33199 /// NM_134671 /	Amnionless	NM_001272884	NM_001272884 // GO:0046331 // lateral inhibition // inferred from mutant phenotype ///	NM_001272884 // GO:0016021 // integral component of membrane // not recorded /// NM_00	---	0.0434314	0.0316972	0.900161	-1.11091	-17 days down vs -24 days	3.66907	0.0814083	0.0554693	1
438	18131392	NM_001316404 // Itgbn // Integrin betanu subunit // 39A1-39A1 // 35368 /// NM_078884 //	Itgbn	NM_001316404	NM_001316404 // GO:0006909 // phagocytosis // inferred from mutant phenotype /// NM_00	NM_001316404 // GO:0008305 // integrin complex // inferred from direct assay /// NM_00	NM_001316404 // GO:0004872 // receptor activity // non-traceable author statement ///	0.269619	0.0481543	0.899501	-1.11173	-17 days down vs -24 days	1.51717	0.0419726	0.0691626	1
10273	18186830	NM_142389 // CG7655 // CG7655 gene product from transcript CG7655-RA // 90C1-90C1 // 42	CG7655	NM_142389	NM_142389 // GO:0046331 // lateral inhibition // inferred from mutant phenotype /// FB	NM_142389 // GO:0005635 // nuclear envelope // inferred from sequence or structural sim	NM_142389 // GO:0003674 // molecular_function // no biological data available /// FBtr	0.193073	0.0254712	0.899224	-1.11207	-17 days down vs -24 days	1.86617	0.0382235	0.0512057	1
13845	18207545	NM_001297943 // CG6903 // CG6903 gene product from transcript CG6903-RA // 4D6-4D6 // 3	CG6903	NM_001297943	NM_001297943 // GO:0007041 // lysosomal transport // inferred from sequence or structur	NM_001297943 // GO:0005765 // lysosomal membrane // inferred from sequence or structura	NM_001297943 // GO:0016746 // transferase activity, transferring acyl groups // inferre	0.150056	0.0391085	0.898837	-1.11255	-17 days down vs -24 days	2.14042	0.0540165	0.063091	1
3932	18150990	NM_137256 // CG15701 // CG15701 gene product from transcript CG15701-RA // 52F11-53A1 /	CG15701	NM_137256	---	---	FBtr0087131 // GO:0005515 // protein binding // inferred from electronic annotation //	0.0519232	0.0410545	0.898697	-1.11272	-17 days down vs -24 days	3.42769	0.0888764	0.0648223	1
6670	18166796	NM_001274531 // tan // tantalus // 65A4-65A4 // 44785 /// NM_080043 // tan // tantalus	tan	NM_001274531	NM_001274531 // GO:0007423 // sensory organ development // inferred from mutant phenoty	NM_001274531 // GO:0005634 // nucleus // inferred from direct assay /// NM_001274531 /	NM_001274531 // GO:0003674 // molecular_function // no biological data available /// N	0.144438	0.0447686	0.898238	-1.11329	-17 days down vs -24 days	2.18285	0.0597039	0.0683783	1
10414	18187611	NM_001038975 // Octbeta1R // Octopamine beta1 receptor // 94B1-94B2 // 42652 /// NM_001	Octbeta1R	NM_001038975	NM_001038975 // GO:0007186 // G-protein coupled receptor signaling pathway // inferred	NM_001038975 // GO:0005887 // integral component of plasma membrane // inferred by cura	NM_001038975 // GO:0004935 // adrenergic receptor activity // inferred from electronic	0.0921999	0.0404721	0.89812	-1.11344	-17 days down vs -24 days	2.70219	0.0704047	0.0651368	1
11818	18195915	NM_001260045 // CG10445 // CG10445 gene product from transcript CG10445-RD // 84E5-84E5	CG10445	NM_001260045	NM_001260045 // GO:0000381 // regulation of alternative mRNA splicing, via spliceosome	NM_001260045 // GO:0005634 // nucleus // inferred by curator /// NM_001300290 // GO:00	NM_001260045 // GO:0005524 // ATP binding // inferred from electronic annotation /// N	0.188367	0.0365005	0.897809	-1.11382	-17 days down vs -24 days	1.89258	0.0471721	0.062312	1
10120	18186010	NM_141991 // CG7488 // CG7488 gene product from transcript CG7488-RA // 87D7-87D7 // 41	CG7488	NM_141991	---	NM_141991 // GO:0005875 // microtubule associated complex // inferred from direct assay	NM_141991 // GO:0005525 // GTP binding // inferred from sequence or structural similari	0.0107415	0.00828538	0.897549	-1.11415	-17 days down vs -24 days	5.86527	0.0795287	0.0338982	1
2922	18145131	NM_001272938 // NLaz // Neural Lazarillo // 22A1-22A1 // 33324 /// NM_001298631 // NLaz	NLaz	NM_001272938	NM_001272938 // GO:0006979 // response to oxidative stress // inferred from mutant phen	NM_001272938 // GO:0005615 // extracellular space // inferred from direct assay /// NM	NM_001272938 // GO:0008289 // lipid binding // inferred from sequence or structural sim	0.0483068	0.0209596	0.897125	-1.11467	-17 days down vs -24 days	3.52432	0.0692692	0.0491366	1
3230	18146672	NR_047881 // mir-4972 // mir-4972 stem loop // 24A3-24A3 // 12798548	mir-4972	NR_047881	---	---	---	0.12458	0.047253	0.897071	-1.11474	-17 days down vs -24 days	2.34976	0.0676977	0.0720261	1
4848	18155890	NR_048130 // snoRNA:Dek-a // ncRNA // 53D14-53D14 // 12798321	snoRNA:Dek-a	NR_048130	---	---	---	0.128336	0.036403	0.896974	-1.11486	-17 days down vs -24 days	2.31592	0.0586483	0.06331	1
14566	18211706	NR_047798 // mir-970 // mir-970 stem loop // 11B6-11B6 // 12797972	mir-970	NR_047798	---	---	---	0.0221913	0.0110507	0.896345	-1.11564	-17 days down vs -24 days	4.65199	0.0719016	0.0386402	1
8869	18179141	NM_079461 // mRpL15 // mitochondrial ribosomal protein L15 // 77C3-77C3 // 40261 /// FB	mRpL15	NM_079461	NM_079461 // GO:0006412 // translation // inferred from sequence or structural similari	NM_079461 // GO:0005762 // mitochondrial large ribosomal subunit // inferred from seque	NM_079461 // GO:0003735 // structural constituent of ribosome // inferred from sequence	0.167746	0.0472977	0.895944	-1.11614	-17 days down vs -24 days	2.0179	0.0595195	0.0737393	1
4988	18156846	NM_001169718 // sbb // scribbler // 55C2-55C4 // 44027 /// NM_001169719 // sbb // scrib	sbb	NM_001169718	NM_001169718 // GO:0000122 // negative regulation of transcription from RNA polymerase	NM_001169718 // GO:0005634 // nucleus // inferred from direct assay /// NM_001169718 /	NM_001169718 // GO:0003700 // transcription factor activity, sequence-specific DNA bind	0.125709	0.0421467	0.894893	-1.11745	-17 days down vs -24 days	2.33947	0.066444	0.0710033	1
10479	18187980	NM_001275981 // Dis3 // CG6413 gene product from transcript CG6413-RA // 95F13-95F14 //	Dis3	NM_001275981	NM_001275981 // GO:0006397 // mRNA processing // inferred from sequence or structural s	NM_001275981 // GO:0000176 // nuclear exosome (RNase complex) // inferred from direct a	NM_001275981 // GO:0000175 // 3'-5'-exoribonuclease activity // inferred from sequence	0.0511349	0.0270978	0.894782	-1.11759	-17 days down vs -24 days	3.44806	0.0795364	0.0576675	1
12092	18197535	NM_142189 // CG6236 // CG6236 gene product from transcript CG6236-RB // 88F1-88F1 // 41	CG6236	NM_142189	NM_142189 // GO:0008152 // metabolic process // inferred from electronic annotation //	NM_142189 // GO:0005615 // extracellular space // --- /// NM_142189 // GO:0016020 // me	NM_142189 // GO:0003824 // catalytic activity // inferred from electronic annotation /	0.1289	0.0465391	0.894302	-1.11819	-17 days down vs -24 days	2.31094	0.069869	0.0755851	1
11031	18191045	NM_001104305 // CG34383 // CG34383 gene product from transcript CG34383-RJ // 87F13-87F	CG34383	NM_001104305	---	---	---	0.0129506	0.00847639	0.89364	-1.11902	-17 days down vs -24 days	5.53614	0.0819226	0.0369945	1
14800	18213024	NM_080324 // Rala // Ras-like protein A // 3E5-3E6 // 31332 /// NM_166985 // Rala // Ra	Rala	NM_080324	NM_080324 // GO:0007265 // Ras protein signal transduction // inferred from genetic int	NM_080324 // GO:0005886 // plasma membrane // inferred from direct assay /// NM_080324	NM_080324 // GO:0003924 // GTPase activity // inferred from direct assay /// NM_080324	0.00399259	0.00663474	0.893375	-1.11935	-17 days down vs -24 days	7.82135	0.10665	0.0340894	1
9829	18184575	NM_141262 // Mms19 // CG12005 gene product from transcript CG12005-RB // 82F6-82F6 // 4	Mms19	NM_141262	NM_141262 // GO:0006281 // DNA repair // non-traceable author statement /// FBtr007877	---	FBtr0078778 // GO:0005488 // binding // inferred from electronic annotation /// FBtr00	0.137584	0.0167223	0.893369	-1.11936	-17 days down vs -24 days	2.23728	0.0431816	0.0482523	1
1768	18138490	NR_047959 // CR43357 // ncRNA // 35C3-35C3 // 12798222 /// NR_124275 // CR43357 // ncRN	CR43357	NR_047959	---	---	---	0.00015812	0.00195435	0.891976	-1.12111	-17 days down vs -24 days	17.6509	0.166599	0.0235965	1
3039	18145670	NM_001103598 // CG34394 // CG34394 gene product from transcript CG34394-RH // 23E5-23E6	CG34394	NM_001103598	---	NM_001103598 // GO:0016020 // membrane // inferred from electronic annotation /// NM_0	---	0.0379275	0.0114384	0.891811	-1.12131	-17 days down vs -24 days	3.8576	0.0661365	0.0428612	1
11592	18194758	NM_079793 // Pdf // Pigment-dispersing factor // 97B3-97B3 // 43193 /// FBtr0085024 //	Pdf	NM_079793	NM_079793 // GO:0007218 // neuropeptide signaling pathway // inferred from direct assay	NM_079793 // GO:0005615 // extracellular space // inferred from direct assay /// NM_07	NM_079793 // GO:0005102 // receptor binding // inferred from physical interaction ///	0.0982403	0.0422354	0.891034	-1.12229	-17 days down vs -24 days	2.62639	0.0805964	0.0767177	1
11904	18196418	NM_001275521 // TAF1B // TATA box-binding protein-associated factor RNA polymerase I su	TAF1B	NM_001275521	NM_001275521 // GO:0001189 // RNA polymerase I transcriptional preinitiation complex as	NM_001275521 // GO:0005668 // RNA polymerase transcription factor SL1 complex // inferr	NM_001275521 // GO:0001164 // RNA polymerase I CORE element sequence-specific DNA bindi	0.255402	0.048518	0.890578	-1.12287	-17 days down vs -24 days	1.57281	0.0522951	0.0831235	1
6949	18168529	NM_001274681 // CG5087 // CG5087 gene product from transcript CG5087-RA // 66F1-66F1 //	CG5087	NM_001274681	NM_001274681 // GO:0016567 // protein ubiquitination // inferred from sequence or struc	NM_001274681 // GO:0005634 // nucleus // not recorded /// NM_001274681 // GO:0005634 /	NM_001274681 // GO:0004842 // ubiquitin-protein transferase activity // not recorded /	0.255555	0.0492969	0.890371	-1.12313	-17 days down vs -24 days	1.5722	0.0529253	0.0841582	1
4471	18153823	NM_166486 // CG30395 // CG30395 gene product from transcript CG30395-RB // 58A1-58A1 //	CG30395	NM_166486	NM_166486 // GO:0032504 // multicellular organism reproduction // inferred from express	NM_166486 // GO:0005615 // extracellular space // inferred from direct assay /// FBtr0	NM_166486 // GO:0003674 // molecular_function // no biological data available /// FBtr	0.00116058	0.00202528	0.890325	-1.12319	-17 days down vs -24 days	10.8633	0.107033	0.0246319	1
13358	18204892	---		---	---	---	---	0.00561238	0.0261673	0.889703	-1.12397	-17 days down vs -24 days	7.10516	0.178289	0.0627322	1
3575	18148910	NM_001273809 // koi // klaroid // 42D4-42D4 // 35594 /// NM_001273810 // koi // klaroid	koi	NM_001273809	NM_001273809 // GO:0007097 // nuclear migration // inferred from mutant phenotype ///	NM_001273809 // GO:0005637 // nuclear inner membrane // non-traceable author statement	---	0.0282803	0.0183763	0.88894	-1.12494	-17 days down vs -24 days	4.28267	0.0936665	0.0546776	1
11449	18193845	NM_080086 // E5 // CG9930 gene product from transcript CG9930-RA // 88A1-88A1 // 45396	E5	NM_080086	NM_080086 // GO:0006355 // regulation of transcription, DNA-templated // inferred from	NM_080086 // GO:0005634 // nucleus // inferred from sequence or structural similarity	NM_080086 // GO:0003700 // transcription factor activity, sequence-specific DNA binding	0.104276	0.0394019	0.8888	-1.12511	-17 days down vs -24 days	2.55592	0.0790919	0.0773615	1
8338	18176383	NM_001014559 // DopEcR // Dopamine/Ecdysteroid receptor // 64B2-64B3 // 38539 /// NM_00	DopEcR	NM_001014559	NM_001014559 // GO:0007186 // G-protein coupled receptor signaling pathway // inferred	NM_001014559 // GO:0005887 // integral component of plasma membrane // inferred from di	NM_001014559 // GO:0001588 // dopamine neurotransmitter receptor activity, coupled via	0.272212	0.0429844	0.888738	-1.12519	-17 days down vs -24 days	1.50737	0.0487804	0.080903	1
1449	18137071	NM_001032085 // CG33641 // CG33641 gene product from transcript CG33641-RA // 34C4-34C4	CG33641	NM_001032085	NM_001032085 // GO:0008150 // biological_process // no biological data available /// F	NM_001032085 // GO:0005575 // cellular_component // no biological data available /// F	NM_001032085 // GO:0003674 // molecular_function // no biological data available /// F	0.0300551	0.0282529	0.888434	-1.12558	-17 days down vs -24 days	4.19259	0.111582	0.0665355	1
12631	18200467	NM_143585 // CG11318 // CG11318 gene product from transcript CG11318-RA // 100B2-100B3	CG11318	NM_143585	NM_143585 // GO:0007166 // cell surface receptor signaling pathway // inferred from ele	NM_143585 // GO:0016021 // integral component of membrane // inferred from electronic a	NM_143585 // GO:0004930 // G-protein coupled receptor activity // inferred from electro	0.0209838	0.0352056	0.888123	-1.12597	-17 days down vs -24 days	4.73965	0.140634	0.0741794	1
11673	18195226	NM_143550 // jdp // CG2239 gene product from transcript CG2239-RB // 99F7-99F7 // 43630	jdp	NM_143550	NM_143550 // GO:0006457 // protein folding // inferred from sequence or structural simi	NM_143550 // GO:0005575 // cellular_component // no biological data available /// NM_1	NM_143550 // GO:0051082 // unfolded protein binding // inferred from sequence or struct	0.0821276	0.0188577	0.888032	-1.12609	-17 days down vs -24 days	2.8425	0.0639352	0.0562314	1
7948	18173983	NM_001274839 // sti // sticky // 69C4-69C4|3-36.8 cM // 39429 /// NM_140327 // sti // s	sti	NM_001274839	NM_001274839 // GO:0000281 // mitotic cytokinesis // inferred from mutant phenotype //	NM_001274839 // GO:0005826 // actomyosin contractile ring // inferred from direct assay	NM_001274839 // GO:0004674 // protein serine/threonine kinase activity // inferred from	0.0159959	0.00569892	0.887796	-1.12638	-17 days down vs -24 days	5.17849	0.0746518	0.0360393	1
12931	18202148	NR_003880 // snoRNA:Psi28S-3385b // ncRNA // 83B4-83B4 // 5740675	snoRNA:Psi28S-3385b	NR_003880	---	---	---	0.197489	0.0358968	0.885738	-1.129	-17 days down vs -24 days	1.84206	0.0577003	0.0783097	1
7456	18171076	NR_001944 // CR32385 // ncRNA // 65D5-65D5 // 3772463	CR32385	NR_001944	---	---	---	0.112056	0.0283217	0.885472	-1.12934	-17 days down vs -24 days	2.4718	0.069629	0.0704233	1
14825	18213204	NM_079950 // Ag5r2 // Antigen 5-related 2 // 12F4-12F4 // 44079 /// FBtr0073938 // Ag5r	Ag5r2	NM_079950	NM_079950 // GO:0008150 // biological_process // no biological data available /// FBtr	NM_079950 // GO:0005576 // extracellular region // not recorded /// NM_079950 // GO:00	NM_079950 // GO:0003674 // molecular_function // no biological data available /// FBtr	0.0360074	0.029334	0.884532	-1.13054	-17 days down vs -24 days	3.93115	0.114503	0.0728177	1
12888	18201854	NM_176540 // CG33107 // CG33107 gene product from transcript CG33107-RA // 94B5-94B5 //	CG33107	NM_176540	---	---	---	0.116013	0.0387491	0.884225	-1.13093	-17 days down vs -24 days	2.4316	0.0813038	0.0835908	1
13575	18205897	NM_001169226 // sn // singed // 7D1-7D2|1-21.0 cM // 31717 /// NM_078521 // sn // singe	sn	NM_001169226	NM_001169226 // GO:0007015 // actin filament organization // traceable author statement	NM_001169226 // GO:0005737 // cytoplasm // inferred from direct assay /// NM_001169226	NM_001169226 // GO:0003779 // actin binding // inferred from sequence or structural sim	0.245217	0.043544	0.884205	-1.13096	-17 days down vs -24 days	1.61484	0.0572629	0.0886508	1
12152	18197880	NM_001170164 // beat-IIb // CG4135 gene product from transcript CG4135-RC // 89F3-90A1	beat-IIb	NM_001170164	NM_001170164 // GO:0007157 // heterophilic cell-cell adhesion via plasma membrane cell	NM_001170164 // GO:0005576 // extracellular region // non-traceable author statement /	NM_001170164 // GO:0003674 // molecular_function // no biological data available /// N	0.0551141	0.0193112	0.884025	-1.13119	-17 days down vs -24 days	3.34882	0.0819804	0.0612009	1
9988	18185374	NM_001104253 // CG8176 // CG8176 gene product from transcript CG8176-RF // 85D19-85D19	CG8176	NM_001104253	NM_001104253 // GO:0072583 // clathrin-mediated endocytosis // inferred from sequence o	NM_001104253 // GO:0005737 // cytoplasm // inferred from direct assay /// NM_001104253	NM_001104253 // GO:0005543 // phospholipid binding // not recorded /// NM_001104253 //	0.01845	0.00288013	0.88399	-1.13123	-17 days down vs -24 days	4.94488	0.0611972	0.0309397	1
5134	18157901	NM_143704 // Sep5 // Septin 5 // 43F8-43F8 // 43990 /// NM_165578 // Sep5 // Septin 5 /	2023-09-05	NM_143704	NM_143704 // GO:0000281 // mitotic cytokinesis // inferred from sequence or structural	NM_143704 // GO:0005875 // microtubule associated complex // inferred from direct assay	NM_143704 // GO:0003924 // GTPase activity // inferred from sequence or structural simi	0.0659856	0.0153096	0.883978	-1.13125	-17 days down vs -24 days	3.11583	0.0694224	0.0557013	1
5081	18157538	NM_001299595 // cnk // connector enhancer of ksr // 54B7-54B7 // 36952 /// NM_166223 //	cnk	NM_001299595	NM_001299595 // GO:0001751 // compound eye photoreceptor cell differentiation // inferr	NM_001299595 // GO:0005737 // cytoplasm // inferred from direct assay /// NM_001299595	NM_001299595 // GO:0005515 // protein binding // inferred from physical interaction //	0.0356745	0.0364936	0.883277	-1.13215	-17 days down vs -24 days	3.94437	0.130319	0.0825981	1
9301	18181280	NM_001202204 // CG42655 // CG42655 gene product from transcript CG42655-RB // 76D6-76D6	CG42655	NM_001202204	NM_001202204 // GO:0008150 // biological_process // no biological data available /// F	NM_001202204 // GO:0016020 // membrane // inferred from electronic annotation /// NM_0	NM_001202204 // GO:0003674 // molecular_function // no biological data available /// F	0.118106	0.0311932	0.881928	-1.13388	-17 days down vs -24 days	2.41097	0.0757642	0.078562	1
1714	18138265	NR_047906 // mir-964 // mir-964 stem loop // 25F2-25F2 // 12798568	mir-964	NR_047906	---	---	---	0.0788542	0.0367292	0.881859	-1.13397	-17 days down vs -24 days	2.89251	0.0983639	0.085016	1
2327	18141787	NM_001298696 // CG14022 // CG14022 gene product from transcript CG14022-RA // 25D6-25D6	CG14022	NM_001298696	NM_001298696 // GO:0008152 // metabolic process // inferred from electronic annotation	---	NM_001298696 // GO:0003998 // acylphosphatase activity // inferred from sequence or str	0.210479	0.0325615	0.88088	-1.13523	-17 days down vs -24 days	1.77451	0.0579783	0.081682	1
749	18133276	NM_134855 // CG9879 // CG9879 gene product from transcript CG9879-RA // 23A2-23A2 // 33	CG9879	NM_134855	NM_134855 // GO:0006352 // DNA-templated transcription, initiation // inferred from ele	---	NM_134855 // GO:0003677 // DNA binding // inferred from electronic annotation /// FBtr	0.0824294	0.0158803	0.880766	-1.13538	-17 days down vs -24 days	2.83801	0.0680125	0.0599121	1
7207	18169777	NM_140726 // QIL1 // CG7603 gene product from transcript CG7603-RA // 74C3-74C3 // 3994	QIL1	NM_140726	NM_140726 // GO:0022008 // neurogenesis // inferred from mutant phenotype /// NM_14072	NM_140726 // GO:0005739 // mitochondrion // inferred from electronic annotation /// NM	---	0.0961854	0.0473545	0.880612	-1.13557	-17 days down vs -24 days	2.65155	0.104777	0.0987884	1
695	18132972	NM_001272919 // CG13949 // CG13949 gene product from transcript CG13949-RA // 21E2-21E2	CG13949	NM_001272919	---	---	---	0.0825975	0.031358	0.880305	-1.13597	-17 days down vs -24 days	2.83552	0.0919618	0.0810802	1
734	18133197	NM_134819 // CG4270 // CG4270 gene product from transcript CG4270-RA // 22D6-22D6 // 33	CG4270	NM_134819	---	NM_134819 // GO:0005576 // extracellular region // inferred from electronic annotation	---	0.111884	0.0377281	0.879954	-1.13642	-17 days down vs -24 days	2.47359	0.0881823	0.0891237	1
7576	18171705	NM_168609 // CG32847 // CG32847 gene product from transcript CG32847-RB // 71B5-71B5 //	CG32847	NM_168609	NM_168609 // GO:0016567 // protein ubiquitination // inferred from sequence or structur	NM_168609 // GO:0005575 // cellular_component // no biological data available /// NM_1	NM_168609 // GO:0004842 // ubiquitin-protein transferase activity // inferred from sequ	0.0375917	0.00406492	0.879491	-1.13702	-17 days down vs -24 days	3.87014	0.0580118	0.037474	1
10152	18186238	NM_001275628 // foxo // forkhead box, sub-group O // 88A5-88A8 // 41709 /// NM_00131649	foxo	NM_001275628	NM_001275628 // GO:0000122 // negative regulation of transcription from RNA polymerase	NM_001275628 // GO:0005634 // nucleus // inferred by curator /// NM_001275628 // GO:00	NM_001275628 // GO:0001077 // transcriptional activator activity, RNA polymerase II cor	0.0249597	0.00837947	0.879323	-1.13724	-17 days down vs -24 days	4.4708	0.0861669	0.0481831	1
35	18130063	---		---	---	---	---	0.000362811	0.00375271	0.879257	-1.13732	-17 days down vs -24 days	14.4932	0.212544	0.0366628	1
8932	18179473	NM_141129 // CG11523 // CG11523 gene product from transcript CG11523-RA // 79D3-79D3 //	CG11523	NM_141129	---	---	---	0.193823	0.0447729	0.879107	-1.13752	-17 days down vs -24 days	1.86203	0.0734138	0.098567	1
13420	18205061	NR_026611 // Su(Ste):CR42417 // ncRNA // --- // 7354450	Su(Ste):CR42417	NR_026611	---	---	---	0.0480534	0.040354	0.87876	-1.13797	-17 days down vs -24 days	3.53141	0.132923	0.0941005	1
14813	18213104	NM_080005 // Rab18 // CG3129 gene product from transcript CG3129-RA // 5A11-5A11 // 443	Rab18	NM_080005	NM_080005 // GO:0007155 // cell adhesion // inferred from mutant phenotype /// NM_0800	NM_080005 // GO:0005769 // early endosome // inferred from direct assay /// NM_080005	NM_080005 // GO:0003924 // GTPase activity // inferred from sequence or structural simi	0.0015348	0.0170865	0.878059	-1.13888	-17 days down vs -24 days	10.1088	0.261808	0.0647477	1
12792	18201348	NM_142813 // CG31156 // CG31156 gene product from transcript CG31156-RA // 94B6-94B6 //	CG31156	NM_142813	NM_142813 // GO:0006139 // nucleobase-containing compound metabolic process // inferred	---	NM_142813 // GO:0003676 // nucleic acid binding // inferred from electronic annotation	0.170535	0.0217012	0.877244	-1.13993	-17 days down vs -24 days	1.99995	0.0580677	0.0725867	1
4051	18151633	NM_001169731 // CG10062 // CG10062 gene product from transcript CG10062-RC // 56D2-56D2	CG10062	NM_001169731	NM_001169731 // GO:0006508 // proteolysis // inferred from electronic annotation /// N	NM_001169731 // GO:0016020 // membrane // inferred from electronic annotation /// NM_0	NM_001169731 // GO:0008237 // metallopeptidase activity // inferred from electronic ann	0.0479015	0.00730989	0.876551	-1.14084	-17 days down vs -24 days	3.53568	0.0681228	0.0481681	1
7004	18168812	NM_140168 // CG7888 // CG7888 gene product from transcript CG7888-RC // 68A3-68A3 // 39	CG7888	NM_140168	NM_140168 // GO:0003333 // amino acid transmembrane transport // inferred from sequence	NM_140168 // GO:0005774 // vacuolar membrane // --- /// NM_140168 // GO:0016020 // memb	NM_140168 // GO:0015171 // amino acid transmembrane transporter activity // inferred fr	0.144999	0.0223665	0.876306	-1.14115	-17 days down vs -24 days	2.17853	0.0651322	0.0747433	1
1188	18135594	NM_136127 // CG13084 // CG13084 gene product from transcript CG13084-RA // 37E3-37E4 //	CG13084	NM_136127	---	NM_136127 // GO:0042600 // chorion // inferred from direct assay /// FBtr0081240 // GO	---	0.0345843	0.0305127	0.875882	-1.14171	-17 days down vs -24 days	3.98873	0.138023	0.0865081	1
16196	18219852	---		---	---	---	---	0.00987605	0.00223595	0.875844	-1.14176	-17 days down vs -24 days	6.01703	0.0795658	0.0330586	1
15139	18214922	NM_132384 // CG2962 // CG2962 gene product from transcript CG2962-RA // 9B4-9B4 // 3195	CG2962	NM_132384	---	---	---	0.00108427	0.0174674	0.875626	-1.14204	-17 days down vs -24 days	11.0533	0.301326	0.0681529	1
15916	18219109	NR_073626 // CR43863 // ncRNA // 1A1-1A1 // 14462374	CR43863	NR_073626	---	---	---	0.163776	0.0229694	0.874789	-1.14313	-17 days down vs -24 days	2.04406	0.0634522	0.0776056	1
1334	18136500	NM_165357 // CG31627 // CG31627 gene product from transcript CG31627-RB // 39A7-39A7 //	CG31627	NM_165357	NM_165357 // GO:0006355 // regulation of transcription, DNA-templated // --- /// NM_165	NM_165357 // GO:0005575 // cellular_component // no biological data available /// NM_1	NM_165357 // GO:0001099 // basal RNA polymerase II transcription machinery binding // -	0.0669319	0.0119588	0.873822	-1.1444	-17 days down vs -24 days	3.09772	0.0749544	0.0604916	1
11740	18195549	NM_141266 // CG12173 // CG12173 gene product from transcript CG12173-RA // 82F7-82F7 //	CG12173	NM_141266	NM_141266 // GO:0019509 // L-methionine biosynthetic process from methylthioadenosine /	NM_141266 // GO:0005634 // nucleus // inferred from electronic annotation /// NM_14126	NM_141266 // GO:0000287 // magnesium ion binding // inferred from electronic annotation	0.272181	0.0454797	0.873468	-1.14486	-17 days down vs -24 days	1.50749	0.0660501	0.109537	1
14615	18211903	NR_047749 // mir-4962 // mir-4962 stem loop // 3F1-3F1 // 12798103	mir-4962	NR_047749	---	---	---	0.06217	0.0298102	0.873341	-1.14503	-17 days down vs -24 days	3.19208	0.114116	0.0893743	1
5770	18161659	NM_001103944 // Liprin-gamma // CG11206 gene product from transcript CG11206-RA // 58D3	Liprin-gamma	NM_001103944	NM_001103944 // GO:0007412 // axon target recognition // inferred from genetic interact	NM_001103944 // GO:0043234 // protein complex // inferred from direct assay /// NM_001	NM_001103944 // GO:0005515 // protein binding // inferred from physical interaction //	0.0684456	0.0302874	0.872932	-1.14557	-17 days down vs -24 days	3.06937	0.111305	0.0906576	1
14726	18212607	NM_057439 // w // white // 3B6-3B6|1-1.5 cM // 31271 /// FBtr0070490 // w // white // 3	w	NM_057439	NM_057439 // GO:0006726 // eye pigment biosynthetic process // non-traceable author sta	NM_057439 // GO:0005887 // integral component of plasma membrane // non-traceable autho	NM_057439 // GO:0004888 // transmembrane signaling receptor activity // non-traceable a	0.093951	0.0125654	0.872696	-1.14587	-17 days down vs -24 days	2.67963	0.067353	0.062838	1
5765	18161630	NM_137810 // Alp2 // Alkaline phosphatase 2 // 58D1-58D1 // 37539 /// FBtr0071782 // Al	Alp2	NM_137810	NM_137810 // GO:0016311 // dephosphorylation // inferred from sequence or structural si	NM_137810 // GO:0009986 // cell surface // inferred from sequence or structural similar	NM_137810 // GO:0004035 // alkaline phosphatase activity // inferred from direct assay	0.0847541	0.0166173	0.872555	-1.14606	-17 days down vs -24 days	2.80404	0.0789149	0.0703581	1
4817	18155680	NM_001259393 // CG43236 // CG43236 gene product from transcript CG43236-RB // 51B7-51B7	CG43236	NM_001259393	NM_001259393 // GO:0008150 // biological_process // no biological data available /// N	NM_001259393 // GO:0016020 // membrane // inferred from electronic annotation /// NM_0	NM_001259393 // GO:0003674 // molecular_function // no biological data available /// N	0.28095	0.0486495	0.872254	-1.14646	-17 days down vs -24 days	1.4751	0.0683197	0.115788	1
8900	18179297	NM_001275218 // CG11309 // CG11309 gene product from transcript CG11309-RF // 78C6-78C6	CG11309	NM_001275218	NM_001275218 // GO:0008150 // biological_process // no biological data available /// N	NM_001275218 // GO:0005575 // cellular_component // no biological data available /// N	NM_001275218 // GO:0003674 // molecular_function // no biological data available /// N	0.216341	0.0479826	0.872244	-1.14647	-17 days down vs -24 days	1.74557	0.0802769	0.114972	1
4458	18153756	NM_165655 // CG30344 // CG30344 gene product from transcript CG30344-RA // 45A12-45A13	CG30344	NM_165655	NM_165655 // GO:0031427 // response to methotrexate // inferred from expression pattern	NM_165655 // GO:0016021 // integral component of membrane // inferred from electronic a	NM_165655 // GO:0005215 // transporter activity // inferred from electronic annotation	0.240861	0.0396565	0.871992	-1.1468	-17 days down vs -24 days	1.63342	0.0684622	0.104784	1
874	18133921	NM_135178 // CG9507 // CG9507 gene product from transcript CG9507-RA // 26C4-26C4 // 33	CG9507	NM_135178	NM_135178 // GO:0006508 // proteolysis // inferred from electronic annotation /// FBtr	---	NM_135178 // GO:0004222 // metalloendopeptidase activity // inferred from sequence or s	0.0063967	0.026561	0.871446	-1.14752	-17 days down vs -24 days	6.84252	0.239619	0.087548	1
15849	18218638	NM_001258748 // CG43075 // CG43075 gene product from transcript CG43075-RA // 13B3-13B3	CG43075	NM_001258748	NM_001258748 // GO:0008150 // biological_process // no biological data available /// F	NM_001258748 // GO:0016020 // membrane // inferred from electronic annotation /// NM_0	NM_001258748 // GO:0003674 // molecular_function // no biological data available /// F	0.0865802	0.0470605	0.871162	-1.14789	-17 days down vs -24 days	2.77812	0.128783	0.115891	1
4244	18152622	NM_001299883 // MAN1 // CG3167 gene product from transcript CG3167-RC // 60B5-60B5 // 3	MAN1	NM_001299883	NM_001299883 // GO:0030514 // negative regulation of BMP signaling pathway // inferred	NM_001299883 // GO:0005639 // integral component of nuclear inner membrane // inferred	FBtr0072166 // GO:0000166 // nucleotide binding // inferred from electronic annotation	0.0284528	0.0263837	0.870916	-1.14822	-17 days down vs -24 days	4.27362	0.150534	0.0880602	1
2425	18142405	NM_001298797 // CG14535 // CG14535 gene product from transcript CG14535-RB // 28D2-28D2	CG14535	NM_001298797	NM_001298797 // GO:0007018 // microtubule-based movement // inferred from sequence or s	NM_001298797 // GO:0005871 // kinesin complex // inferred from electronic annotation /	NM_001298797 // GO:0003777 // microtubule motor activity // inferred from sequence or s	0.0753537	0.033728	0.870785	-1.14839	-17 days down vs -24 days	2.94876	0.116576	0.0988351	1
10462	18187886	NM_001260344 // AP-1sigma // Adaptor Protein complex 1, sigma subunit // 95D1-95D1 // 4	AP-1sigma	NM_001260344	NM_001260344 // GO:0006886 // intracellular protein transport // inferred from electron	NM_001260344 // GO:0008021 // synaptic vesicle // traceable author statement /// NM_00	NM_001260344 // GO:0008565 // protein transporter activity // inferred from mutant phen	0.101068	0.0264035	0.870662	-1.14855	-17 days down vs -24 days	2.59277	0.0917444	0.0884618	1
9630	18183278	NM_001104255 // Dh44 // Diuretic hormone 44 // 85E2-85E2 // 41170 /// NM_141665 // Dh44	Dh44	NM_001104255	NM_001104255 // GO:0007186 // G-protein coupled receptor signaling pathway // inferred	NM_001104255 // GO:0005576 // extracellular region // inferred from electronic annotati	NM_001104255 // GO:0001664 // G-protein coupled receptor binding // inferred from physi	0.198723	0.0457613	0.869648	-1.14989	-17 days down vs -24 days	1.83542	0.0859877	0.117122	1
5106	18157728	NM_001032224 // Spn43Ab // Serpin 43Ab // 42F3-42F3 // 45040 /// FBtr0100356 // Spn43Ab	Spn43Ab	NM_001032224	NM_001032224 // GO:0032504 // multicellular organism reproduction // inferred from expr	NM_001032224 // GO:0005615 // extracellular space // inferred from electronic annotatio	NM_001032224 // GO:0004867 // serine-type endopeptidase inhibitor activity // not recor	0.214326	0.0408184	0.868523	-1.15138	-17 days down vs -24 days	1.75542	0.0790481	0.112577	1
15253	18215501	NM_001144725 // CG14408 // CG14408 gene product from transcript CG14408-RH // 12F5-12F5	CG14408	NM_001144725	NM_001144725 // GO:0035556 // intracellular signal transduction // --- /// NM_001144725	NM_001144725 // GO:0005737 // cytoplasm // --- /// NM_001298318 // GO:0005737 // cytopl	NM_001144725 // GO:0017124 // SH3 domain binding // inferred from sequence or structura	0.0127134	0.0390475	0.868503	-1.15141	-17 days down vs -24 days	5.56813	0.245356	0.110161	1
2445	18142527	NM_135350 // CG8372 // CG8372 gene product from transcript CG8372-RA // 28F3-28F3 // 34	CG8372	NM_135350	---	NM_135350 // GO:0016020 // membrane // inferred from electronic annotation /// NM_1353	---	0.0659281	0.0403932	0.868493	-1.15142	-17 days down vs -24 days	3.11694	0.139696	0.112046	1
15807	18218358	NM_001038740 // CG42541 // CG42541 gene product from transcript CG42541-RE // 3F6-3F7 /	CG42541	NM_001038740	NM_001038740 // GO:0006909 // phagocytosis // inferred from mutant phenotype /// NM_00	NM_001038740 // GO:0016020 // membrane // inferred from electronic annotation /// NM_0	NM_001038740 // GO:0005525 // GTP binding // inferred from sequence or structural simil	0.0432296	0.0181977	0.867531	-1.1527	-17 days down vs -24 days	3.67547	0.116652	0.0793447	1
6499	18165690	NM_001274326 // rho // rhomboid // 62A2-62A2|3-0.2 cM // 38168 /// NM_079159 // rho //	rho	NM_001274326	NM_001274326 // GO:0000281 // mitotic cytokinesis // inferred from mutant phenotype //	NM_001274326 // GO:0005783 // endoplasmic reticulum // inferred from direct assay ///	NM_001274326 // GO:0004252 // serine-type endopeptidase activity // inferred from direc	0.0192654	0.0363867	0.866668	-1.15384	-17 days down vs -24 days	4.87534	0.213815	0.109641	1
7535	18171482	NM_167944 // CG32302 // CG32302 gene product from transcript CG32302-RA // 62D4-62D5 //	CG32302	NM_167944	NM_167944 // GO:0006030 // chitin metabolic process // inferred from electronic annotat	NM_167944 // GO:0005576 // extracellular region // inferred from electronic annotation	NM_167944 // GO:0008061 // chitin binding // inferred from electronic annotation /// F	0.169355	0.0379487	0.865526	-1.15537	-17 days down vs -24 days	2.0075	0.0915269	0.113981	1
1689	18138098	NM_001103718 // CG42748 // CG42748 gene product from transcript CG42748-RJ // 40F1-40F2	CG42748	NM_001103718	---	NM_001103718 // GO:0005886 // plasma membrane // inferred from direct assay /// NM_001	NM_001103718 // GO:0008157 // protein phosphatase 1 binding // inferred from physical i	0.0752562	0.0227681	0.864979	-1.1561	-17 days down vs -24 days	2.95037	0.107269	0.0908948	1
3450	18148059	NM_080032 // Cyp4e1 // Cytochrome P450-4e1 // 44D1-44D1 // 44632 /// FBtr0088746 // Cyp	Cyp4e1	NM_080032	NM_080032 // GO:0055114 // oxidation-reduction process // inferred from electronic anno	NM_080032 // GO:0016020 // membrane // non-traceable author statement /// NM_080032 //	NM_080032 // GO:0005506 // iron ion binding // inferred from electronic annotation ///	0.127228	0.0322435	0.864132	-1.15723	-17 days down vs -24 days	2.32578	0.100267	0.107778	1
485	18131685	NM_001273199 // Cpr // Cytochrome P450 reductase // 26C3-26C3 // 33883 /// NM_001273200	Cpr	NM_001273199	NM_001273199 // GO:0055114 // oxidation-reduction process // inferred from electronic a	NM_001273199 // GO:0005783 // endoplasmic reticulum // non-traceable author statement	NM_001273199 // GO:0003958 // NADPH-hemoprotein reductase activity // inferred from seq	0.0526472	0.0474314	0.864081	-1.1573	-17 days down vs -24 days	3.4093	0.178025	0.130544	1
11577	18194636	NM_001275889 // Mitofilin // CG6455 gene product from transcript CG6455-RC // 94A1-94A1	Mitofilin	NM_001275889	NM_001275889 // GO:0022008 // neurogenesis // inferred from mutant phenotype /// NM_00	NM_001275889 // GO:0005739 // mitochondrion // inferred from direct assay /// NM_00127	NM_001275889 // GO:0003674 // molecular_function // no biological data available /// N	0.144553	0.0461624	0.863946	-1.15748	-17 days down vs -24 days	2.18196	0.112584	0.128994	1
9190	18180668	NR_033162 // Uhg7 // ncRNA // 62A10-62A10 // 8674061 /// KJ808685 // RpL23A // Ribosoma	Uhg7	NR_033162	KJ808685 // GO:0006412 // translation // inferred from sequence or structural similarit	KJ808685 // GO:0005840 // ribosome // inferred from direct assay /// KJ808685 // GO:00	KJ808685 // GO:0000166 // nucleotide binding // inferred from electronic annotation //	0.212247	0.0267381	0.863912	-1.15753	-17 days down vs -24 days	1.76569	0.0700921	0.0992418	1
4125	18152042	NM_137751 // CG10082 // CG10082 gene product from transcript CG10082-RA // 57F6-57F6 //	CG10082	NM_137751	NM_137751 // GO:0006468 // protein phosphorylation // inferred from sequence or structu	NM_137751 // GO:0005737 // cytoplasm // inferred from sequence or structural similarity	NM_137751 // GO:0000828 // inositol hexakisphosphate kinase activity // inferred from s	0.213012	0.0349398	0.863778	-1.15771	-17 days down vs -24 days	1.7619	0.079353	0.112596	1
10142	18186162	NM_001260158 // CG10841 // CG10841 gene product from transcript CG10841-RA // 87F5-87F5	CG10841	NM_001260158	---	---	NM_001260158 // GO:0005509 // calcium ion binding // inferred from electronic annotatio	0.0763709	0.0252307	0.863277	-1.15838	-17 days down vs -24 days	2.93211	0.114563	0.0976802	1
4045	18151597	NM_137561 // CG18606 // CG18606 gene product from transcript CG18606-RB // 56C8-56C8 //	CG18606	NM_137561	---	---	---	0.162385	0.0189406	0.863228	-1.15844	-17 days down vs -24 days	2.0534	0.0709816	0.0864198	1
5440	18159928	NM_136960 // CG8785 // CG8785 gene product from transcript CG8785-RA // 49B10-49B11 //	CG8785	NM_136960	NM_136960 // GO:0003333 // amino acid transmembrane transport // inferred from sequence	NM_136960 // GO:0005774 // vacuolar membrane // --- /// NM_136960 // GO:0016020 // memb	NM_136960 // GO:0015171 // amino acid transmembrane transporter activity // inferred fr	0.030703	0.0302003	0.863217	-1.15846	-17 days down vs -24 days	4.16126	0.17654	0.106061	1
15674	18217735	NM_001014717 // msta // CG33548 gene product from transcript CG33548-RD // 2E2-2E2 // 3	msta	NM_001014717	NM_001014717 // GO:0010629 // negative regulation of gene expression // inferred from s	---	NM_001014717 // GO:0042826 // histone deacetylase binding // inferred from sequence or	0.0126301	0.0299672	0.863089	-1.15863	-17 days down vs -24 days	5.57955	0.236343	0.105897	1
4127	18152059	NM_137757 // NC2alpha // Negative Cofactor 2alpha // 57F7-57F7 // 37471 /// FBtr0071666	NC2alpha	NM_137757	NM_137757 // GO:0000122 // negative regulation of transcription from RNA polymerase II	NM_137757 // GO:0005634 // nucleus // inferred by curator /// NM_137757 // GO:0017054	NM_137757 // GO:0001075 // transcription factor activity, RNA polymerase II core promot	0.102029	0.0199076	0.863004	-1.15874	-17 days down vs -24 days	2.58159	0.0914433	0.0885532	1
9500	18182452	NM_080203 // l(3)87Df // lethal (3) 87Df // 87D9-87D9 // 49762 /// FBtr0082703 // l(3)8	l(3)87Df	NM_080203	NM_080203 // GO:0008150 // biological_process // no biological data available /// NM_0	NM_080203 // GO:0005575 // cellular_component // no biological data available /// NM_0	NM_080203 // GO:0003674 // molecular_function // no biological data available /// FBtr	0.0772005	0.0134257	0.862747	-1.15909	-17 days down vs -24 days	2.91871	0.0884826	0.0757891	1
8784	18178674	NM_079415 // skl // sickle // 75C6-75C6 // 40016 /// FBtr0075119 // skl // sickle // 75	skl	NM_079415	NM_079415 // GO:0006915 // apoptotic process // inferred from direct assay /// NM_0794	NM_079415 // GO:0005575 // cellular_component // no biological data available /// FBtr	---	0.0541813	0.00972405	0.862165	-1.15987	-17 days down vs -24 days	3.37131	0.0912441	0.0676622	1
6109	18163460	NM_001032223 // CG33914 // CG33914 gene product from transcript CG33914-RC // 42E5-42E5	CG33914	NM_001032223	NM_001032223 // GO:0008150 // biological_process // no biological data available /// N	NM_001032223 // GO:0005575 // cellular_component // no biological data available /// N	NM_001032223 // GO:0003674 // molecular_function // no biological data available /// N	0.0443315	0.00512633	0.862041	-1.16004	-17 days down vs -24 days	3.64094	0.0787816	0.0540943	1
15545	18217020	NM_001272415 // CG12659 // CG12659 gene product from transcript CG12659-RC // 7F7-7F7 /	CG12659	NM_001272415	NM_001272415 // GO:0006338 // chromatin remodeling // inferred from electronic annotati	NM_001272415 // GO:0031011 // Ino80 complex // inferred from electronic annotation ///	---	0.0171012	0.0306842	0.859983	-1.16281	-17 days down vs -24 days	5.06833	0.227809	0.112369	1
5777	18161714	NM_137846 // CG17807 // CG17807 gene product from transcript CG17807-RA // 58F2-58F2 //	CG17807	NM_137846	NM_137846 // GO:0055114 // oxidation-reduction process // inferred from electronic anno	---	NM_137846 // GO:0008168 // methyltransferase activity // inferred from electronic annot	0.127528	0.0475868	0.859774	-1.1631	-17 days down vs -24 days	2.3231	0.129969	0.139865	1
2417	18142340	NM_135293 // CG13794 // CG13794 gene product from transcript CG13794-RA // 28C2-28C2 //	CG13794	NM_135293	NM_135293 // GO:0006836 // neurotransmitter transport // not recorded /// NM_135293 //	NM_135293 // GO:0016021 // integral component of membrane // inferred from electronic a	NM_135293 // GO:0005326 // neurotransmitter transporter activity // inferred from seque	0.0373846	0.0464453	0.859508	-1.16346	-17 days down vs -24 days	3.87794	0.215112	0.138677	1
14022	18208461	NM_132463 // CG15201 // CG15201 gene product from transcript CG15201-RA // 10A8-10A8 //	CG15201	NM_132463	---	NM_132463 // GO:0005615 // extracellular space // not recorded /// NM_132463 // GO:000	---	0.226812	0.032359	0.859161	-1.16393	-17 days down vs -24 days	1.69601	0.079142	0.116659	1
11541	18194393	NM_080062 // Actn3 // alpha actinin 3 // 89E5-89E5 // 44964 /// FBtr0083380 // Actn3 //	Actn3	NM_080062	NM_080062 // GO:0051017 // actin filament bundle assembly // inferred from sequence or	---	NM_080062 // GO:0003779 // actin binding // inferred from sequence or structural simila	0.0541222	0.0267436	0.8589	-1.16428	-17 days down vs -24 days	3.37275	0.144763	0.107304	1
2094	18140550	NM_001169441 // fu12 // CG17608 gene product from transcript CG17608-RA // 29C5-29D1 //	fu12	NM_001169441	NM_001169441 // GO:0008654 // phospholipid biosynthetic process // inferred from electr	NM_001169441 // GO:0016020 // membrane // inferred from electronic annotation /// NM_0	NM_001169441 // GO:0003841 // 1-acylglycerol-3-phosphate O-acyltransferase activity //	0.053852	0.0281552	0.858841	-1.16436	-17 days down vs -24 days	3.37936	0.148592	0.109926	1
11532	18194337	NM_001275835 // Sep2 // Septin 2 // 92F2-92F2 // 42438 /// NM_079693 // Sep2 // Septin	2023-09-02	NM_001275835	NM_001275835 // GO:0000281 // mitotic cytokinesis // inferred from mutant phenotype //	NM_001275835 // GO:0005875 // microtubule associated complex // inferred from direct as	NM_001275835 // GO:0003924 // GTPase activity // inferred from direct assay /// NM_001	0.0974106	0.0340709	0.858644	-1.16463	-17 days down vs -24 days	2.63648	0.127067	0.120489	1
15460	18216575	NM_001298563 // CG11710 // CG11710 gene product from transcript CG11710-RC // 19D1-19D1	CG11710	NM_001298563	NM_001298563 // GO:0006355 // regulation of transcription, DNA-templated // inferred fr	NM_001298563 // GO:0005634 // nucleus // inferred from electronic annotation /// NM_00	NM_001298563 // GO:0008270 // zinc ion binding // inferred from electronic annotation	0.075262	0.0300426	0.858472	-1.16486	-17 days down vs -24 days	2.95028	0.134396	0.113884	1
9925	18185073	NM_141510 // CG7878 // CG7878 gene product from transcript CG7878-RA // 84E13-84E13 //	CG7878	NM_141510	NM_141510 // GO:0010501 // RNA secondary structure unwinding // --- /// FBtr0113205 //	---	NM_141510 // GO:0003723 // RNA binding // inferred from electronic annotation /// NM_1	0.0077186	0.00574454	0.857145	-1.16666	-17 days down vs -24 days	6.47689	0.157063	0.0606242	1
14350	18210222	NM_001297837 // CG11379 // CG11379 gene product from transcript CG11379-RB // 1E3-1E3 /	CG11379	NM_001297837	---	NM_001297837 // GO:0016020 // membrane // inferred from electronic annotation /// NM_0	---	0.238272	0.0469325	0.856848	-1.16707	-17 days down vs -24 days	1.64464	0.0955195	0.145198	1
5532	18160365	NM_001299520 // CG8157 // CG8157 gene product from transcript CG8157-RB // 51F6-51F6 //	CG8157	NM_001299520	---	---	---	0.00812688	0.00952364	0.856462	-1.16759	-17 days down vs -24 days	6.37889	0.186998	0.0732878	1
9882	18184846	NM_141386 // CG10298 // CG10298 gene product from transcript CG10298-RA // 83E4-83E4 //	CG10298	NM_141386	NM_141386 // GO:0008150 // biological_process // no biological data available /// FBtr	NM_141386 // GO:0005575 // cellular_component // no biological data available /// FBtr	NM_141386 // GO:0003674 // molecular_function // no biological data available /// FBtr	0.0539883	0.0425631	0.856314	-1.1678	-17 days down vs -24 days	3.37602	0.188008	0.139223	1
6721	18167125	NM_138263 // FucTD // CG9169 gene product from transcript CG9169-RA // 62A1-62A1 // 381	FucTD	NM_138263	NM_138263 // GO:0006486 // protein glycosylation // inferred from electronic annotation	NM_138263 // GO:0016020 // membrane // inferred from electronic annotation /// NM_1382	NM_138263 // GO:0046920 // alpha-(1->3)-fucosyltransferase activity // inferred from se	0.022501	0.0386876	0.856266	-1.16786	-17 days down vs -24 days	4.63042	0.246049	0.132844	1
6764	18167374	NM_001144403 // MEP-1 // CG1244 gene product from transcript CG1244-RG // 62E8-62E8 //	MEP-1	NM_001144403	NM_001144403 // GO:0000122 // negative regulation of transcription from RNA polymerase	NM_001144403 // GO:0005634 // nucleus // inferred from direct assay /// NM_001144403 /	NM_001144403 // GO:0003682 // chromatin binding // inferred from direct assay /// NM_0	0.0481461	0.0201726	0.855806	-1.16849	-17 days down vs -24 days	3.52881	0.140391	0.0994609	1
5231	18158561	NM_001299226 // Br140 // CG1845 gene product from transcript CG1845-RB // 43A2-43A2 //	Br140	NM_001299226	NM_001299226 // GO:0033563 // dorsal/ventral axon guidance // inferred from mutant phen	---	NM_001299226 // GO:0008270 // zinc ion binding // inferred from electronic annotation	0.0225529	0.0278533	0.855802	-1.1685	-17 days down vs -24 days	4.62684	0.211995	0.114546	1
3839	18150461	NM_137001 // FLASH // FLASH ortholog // 49F8-49F9 // 36455 /// NM_206106 // FLASH // FL	FLASH	NM_137001	NM_137001 // GO:0006398 // mRNA 3'-end processing by stem-loop binding and cleavage //	NM_137001 // GO:0035363 // histone locus body // inferred from direct assay /// NM_137	NM_137001 // GO:0005515 // protein binding // inferred from physical interaction /// N	0.0405162	0.0262741	0.854952	-1.16966	-17 days down vs -24 days	3.76515	0.170187	0.113002	1
2149	18140889	NM_135943 // GMF // Glia maturation factor // 35F1-35F1 // 34963 /// FBtr0080851 // GMF	GMF	NM_135943	NM_135943 // GO:0007298 // border follicle cell migration // inferred from mutant pheno	NM_135943 // GO:0005634 // nucleus // inferred from direct assay /// NM_135943 // GO:0	NM_135943 // GO:0003779 // actin binding // inferred from electronic annotation /// NM	0.207747	0.02596	0.854762	-1.16992	-17 days down vs -24 days	1.78832	0.080628	0.112715	1
11146	18191871	NM_001043226 // ps // pasilla // 85D16-85D17 // 44258 /// NM_001043227 // ps // pasilla	ps	NM_001043226	NM_001043226 // GO:0000398 // mRNA splicing, via spliceosome // inferred from expressio	NM_001043226 // GO:0005634 // nucleus // inferred from direct assay /// NM_001043226 /	NM_001043226 // GO:0003729 // mRNA binding // inferred from sequence or structural simi	0.0361614	0.00436158	0.854465	-1.17032	-17 days down vs -24 days	3.92508	0.0903299	0.0575338	1
787	18133488	NM_134936 // Sec5 // Sec5 ortholog (S. cerevisiae) // 23F3-23F3 // 33563 /// FBtr007751	Sec5	NM_134936	NM_134936 // GO:0000281 // mitotic cytokinesis // inferred from mutant phenotype /// N	NM_134936 // GO:0000145 // exocyst // inferred from direct assay /// NM_134936 // GO:0	NM_134936 // GO:0017137 // Rab GTPase binding // inferred from physical interaction //	0.106145	0.0401739	0.85425	-1.17062	-17 days down vs -24 days	2.53506	0.141444	0.139488	1
11567	18194562	NM_169953 // Rab1 // CG3320 gene product from transcript CG3320-RA // 93D2-93D2 // 4252	Rab1	NM_169953	NM_169953 // GO:0006888 // ER to Golgi vesicle-mediated transport // traceable author s	NM_169953 // GO:0005737 // cytoplasm // inferred from direct assay /// NM_169953 // GO	NM_169953 // GO:0003924 // GTPase activity // inferred from sequence or structural simi	0.0859569	0.0290897	0.853934	-1.17105	-17 days down vs -24 days	2.78689	0.133925	0.120138	1
12211	18198202	NM_142500 // CG14294 // CG14294 gene product from transcript CG14294-RA // 91D4-91D4 //	CG14294	NM_142500	---	NM_142500 // GO:0016020 // membrane // inferred from electronic annotation /// NM_1425	---	0.0134228	0.0170946	0.853763	-1.17129	-17 days down vs -24 days	5.47445	0.209612	0.0957227	1
5705	18161327	NM_001299709 // CG11180 // CG11180 gene product from transcript CG11180-RB // 57A7-57A8	CG11180	NM_001299709	NM_001299709 // GO:0022008 // neurogenesis // inferred from mutant phenotype /// NM_13	---	NM_001299709 // GO:0003676 // nucleic acid binding // inferred from electronic annotati	0.0294117	0.0378982	0.853678	-1.1714	-17 days down vs -24 days	4.22449	0.230972	0.136686	1
3923	18150898	NM_166136 // CG8401 // CG8401 gene product from transcript CG8401-RB // 52D15-52D15 //	CG8401	NM_166136	NM_166136 // GO:0008150 // biological_process // no biological data available /// FBtr	NM_166136 // GO:0005575 // cellular_component // no biological data available /// FBtr	NM_166136 // GO:0003674 // molecular_function // no biological data available /// FBtr	0.00844957	0.00343708	0.852801	-1.17261	-17 days down vs -24 days	6.30551	0.137638	0.0545704	1
7219	18169846	NM_001275072 // CG7441 // CG7441 gene product from transcript CG7441-RA // 75A4-75A4 //	CG7441	NM_001275072	NM_001275072 // GO:0006436 // tryptophanyl-tRNA aminoacylation // inferred from electro	NM_001275072 // GO:0005737 // cytoplasm // inferred from electronic annotation /// NM_	NM_001275072 // GO:0004830 // tryptophan-tRNA ligase activity // inferred from sequence	0.331582	0.0458041	0.852398	-1.17316	-17 days down vs -24 days	1.3075	0.080127	0.153206	1
6736	18167237	NM_139395 // CG12035 // CG12035 gene product from transcript CG12035-RA // 62B1-62B1 //	CG12035	NM_139395	NM_139395 // GO:0008150 // biological_process // no biological data available /// FBtr	NM_139395 // GO:0005575 // cellular_component // no biological data available /// NM_1	NM_139395 // GO:0003674 // molecular_function // no biological data available /// FBtr	0.0827511	0.0191863	0.852308	-1.17328	-17 days down vs -24 days	2.83324	0.116252	0.102578	1
6620	18166486	NM_079174 // rasp // CG11495 gene product from transcript CG11495-RA // 63B8-63B8|3-4.3	rasp	NM_079174	NM_079174 // GO:0007224 // smoothened signaling pathway // inferred from mutant phenoty	NM_079174 // GO:0005886 // plasma membrane // non-traceable author statement /// NM_07	NM_079174 // GO:0016409 // palmitoyltransferase activity // inferred from mutant phenot	0.232091	0.0496828	0.852165	-1.17348	-17 days down vs -24 days	1.67199	0.107273	0.160397	1
13267	18204191	NM_001272124 // CG32850 // CG32850 gene product from transcript CG32850-RB // 102B3-102	CG32850	NM_001272124	NM_001272124 // GO:0042787 // protein ubiquitination involved in ubiquitin-dependent pr	NM_001272124 // GO:0000151 // ubiquitin ligase complex // inferred from sequence or str	NM_001272124 // GO:0004842 // ubiquitin-protein transferase activity // inferred from s	0.151773	0.0186067	0.851772	-1.17402	-17 days down vs -24 days	2.12781	0.0868776	0.102074	1
12991	18202418	NR_002491 // snoRNA:Psi28S-3186 // ncRNA // 83B4-83B4 // 3772266	snoRNA:Psi28S-3186	NR_002491	---	NR_002491 // GO:0005730 // nucleolus // non-traceable author statement	---	0.0470844	0.00453196	0.851198	-1.17481	-17 days down vs -24 days	3.55893	0.0870383	0.0611408	1
7967	18174187	NM_001274909 // stwl // stonewall // 70D6-70D7 // 39581 /// NM_001274910 // stwl // sto	stwl	NM_001274909	NM_001274909 // GO:0006325 // chromatin organization // inferred from mutant phenotype	NM_001274909 // GO:0005634 // nucleus // inferred from direct assay /// NM_001274909 /	NM_001274909 // GO:0003677 // DNA binding // inferred from electronic annotation /// N	0.128089	0.0436427	0.850611	-1.17562	-17 days down vs -24 days	2.31811	0.14225	0.153412	1
9433	18182053	NR_073906 // CR43785 // ncRNA // 61C9-61C9 // 14462824 /// NR_073907 // CR43785 // ncRN	CR43785	NR_073906	---	---	---	0.0653608	0.0114474	0.848014	-1.17923	-17 days down vs -24 days	3.12796	0.111203	0.0888782	1
12985	18202375	NM_176587 // Tpi // Triose phosphate isomerase // 99D8-99D8|3-101.3 cM // 43582 /// NM_	Tpi	NM_176587	NM_176587 // GO:0006096 // glycolytic process // inferred from mutant phenotype /// NM	NM_176587 // GO:0030018 // Z disc // inferred from direct assay /// NM_176587 // GO:00	NM_176587 // GO:0004807 // triose-phosphate isomerase activity // inferred from direct	0.105264	0.0310552	0.847962	-1.1793	-17 days down vs -24 days	2.54484	0.137495	0.135072	1
7147	18169523	NM_001274975 // elgi // early girl // 72B2-72C1 // 39735 /// NM_140559 // elgi // early	elgi	NM_001274975	NM_001274975 // GO:0000209 // protein polyubiquitination // inferred from sequence or s	NM_001274975 // GO:0005575 // cellular_component // no biological data available /// N	NM_001274975 // GO:0004842 // ubiquitin-protein transferase activity // inferred from s	0.0241549	0.0313818	0.847939	-1.17933	-17 days down vs -24 days	4.52091	0.245533	0.135777	1
10500	18188126	NM_143044 // CG7016 // CG7016 gene product from transcript CG7016-RA // 96B1-96B1 // 42	CG7016	NM_143044	NM_143044 // GO:0008150 // biological_process // no biological data available /// FBtr	NM_143044 // GO:0005575 // cellular_component // no biological data available /// FBtr	NM_143044 // GO:0003674 // molecular_function // no biological data available /// FBtr	0.00149068	0.000515387	0.847449	-1.18001	-17 days down vs -24 days	10.1856	0.137837	0.0338313	1
13088	18203113	NM_001300386 // CG9759 // CG9759 gene product from transcript CG9759-RB // 87F4-87F4 //	CG9759	NM_001300386	---	FBtr0082862 // GO:0016020 // membrane // inferred from electronic annotation /// FBtr0	---	0.0704975	0.0373775	0.84737	-1.18012	-17 days down vs -24 days	3.0321	0.180461	0.148792	1
1067	18134997	NM_135678 // Mal-B1 // Maltase B1 // 33A3-33A4 // 34597 /// FBtr0080275 // Mal-B1 // Ma	Mal-B1	NM_135678	NM_135678 // GO:0005975 // carbohydrate metabolic process // inferred from electronic a	---	NM_135678 // GO:0004558 // alpha-1,4-glucosidase activity // inferred from sequence or	0.0559785	0.0234354	0.845837	-1.18226	-17 days down vs -24 days	3.32838	0.163271	0.122635	1
10507	18188171	NM_143057 // CG11771 // CG11771 gene product from transcript CG11771-RA // 96B10-96B10	CG11771	NM_143057	NM_143057 // GO:0006508 // proteolysis // inferred from electronic annotation /// NM_1	---	NM_143057 // GO:0004222 // metalloendopeptidase activity // inferred from sequence or s	0.00307326	0.0019362	0.84566	-1.18251	-17 days down vs -24 days	8.40526	0.170124	0.0506004	1
8235	18175837	NM_001274338 // CG12104 // CG12104 gene product from transcript CG12104-RB // 62A7-62A7	CG12104	NM_001274338	NM_001274338 // GO:0006338 // chromatin remodeling // --- /// NM_001274338 // GO:000635	NM_001274338 // GO:0005575 // cellular_component // no biological data available /// N	NM_001274338 // GO:0003674 // molecular_function // no biological data available /// N	0.0911667	0.0168663	0.845415	-1.18285	-17 days down vs -24 days	2.71573	0.116668	0.1074	1
9643	18183423	NM_001144541 // Pak // p21-activated kinase // 83E4-83E4 // 44039 /// NM_001275380 // P	Pak	NM_001144541	NM_001144541 // GO:0006468 // protein phosphorylation // inferred from mutant phenotype	NM_001144541 // GO:0005737 // cytoplasm // inferred from direct assay /// NM_001144541	NM_001144541 // GO:0004674 // protein serine/threonine kinase activity // inferred from	0.0217646	0.0117612	0.844603	-1.18399	-17 days down vs -24 days	4.68231	0.176509	0.0942426	1
3318	18147098	NM_001274001 // Aats-asp // Aspartyl-tRNA synthetase // 49D7-49D7 // 36420 /// NM_00127	Aats-asp	NM_001274001	NM_001274001 // GO:0006422 // aspartyl-tRNA aminoacylation // inferred from sequence or	NM_001274001 // GO:0005737 // cytoplasm // inferred from electronic annotation /// NM_	NM_001274001 // GO:0003676 // nucleic acid binding // inferred from electronic annotati	0.058045	0.0381663	0.844565	-1.18404	-17 days down vs -24 days	3.28099	0.205258	0.1564	1
5703	18161314	NM_080378 // Mgat1 // Mannosyl (alpha-1,3-)-glycoprotein beta-1,2-N-acetylglucosaminylt	Mgat1	NM_080378	NM_080378 // GO:0006487 // protein N-linked glycosylation // inferred from direct assay	NM_080378 // GO:0005797 // Golgi medial cisterna // inferred from direct assay /// FBt	NM_080378 // GO:0003827 // alpha-1,3-mannosylglycoprotein 2-beta-N-acetylglucosaminyltr	0.0366965	0.00444896	0.843812	-1.1851	-17 days down vs -24 days	3.90423	0.105445	0.0675198	1
9487	18182355	NM_079872 // Ef1alpha100E // Elongation factor 1alpha100E // 100D2-100D2 // 43736 /// N	Ef1alpha100E	NM_079872	NM_079872 // GO:0006412 // translation // non-traceable author statement /// NM_079872	NM_079872 // GO:0005737 // cytoplasm // inferred from electronic annotation /// NM_079	NM_079872 // GO:0003746 // translation elongation factor activity // inferred from sequ	0.224014	0.0324593	0.843194	-1.18597	-17 days down vs -24 days	1.70899	0.100822	0.147487	1
14121	18208944	NM_001038754 // CG12481 // CG12481 gene product from transcript CG12481-RB // 12E2-12E2	CG12481	NM_001038754	---	---	---	0.113419	0.0166473	0.842226	-1.18733	-17 days down vs -24 days	2.45777	0.109806	0.111693	1
8258	18175967	NM_001299981 // CG5687 // CG5687 gene product from transcript CG5687-RB // 62B11-62B11	CG5687	NM_001299981	NM_001299981 // GO:0055085 // transmembrane transport // inferred from electronic annot	NM_001299981 // GO:0016020 // membrane // inferred from electronic annotation /// NM_0	NM_001299981 // GO:0008507 // sodium:iodide symporter activity // inferred from sequenc	0.0290911	0.00468747	0.841533	-1.18831	-17 days down vs -24 days	4.2407	0.120277	0.0709063	1
3856	18150527	NM_137048 // S-Lap5 // Sperm-Leucylaminopeptidase 5 // 50B4-50B5 // 36515 /// FBtr00876	S-Lap5	NM_137048	NM_137048 // GO:0006508 // proteolysis // inferred from electronic annotation /// NM_1	NM_137048 // GO:0005737 // cytoplasm // inferred from electronic annotation /// NM_137	NM_137048 // GO:0004177 // aminopeptidase activity // inferred from electronic annotati	0.0329411	0.00374513	0.841384	-1.18852	-17 days down vs -24 days	4.05882	0.107154	0.066001	1
7338	18170480	NM_141095 // Rpb8 // CG11246 gene product from transcript CG11246-RA // 78E5-78E5 // 40	Rpb8	NM_141095	NM_141095 // GO:0006366 // transcription from RNA polymerase II promoter // inferred fr	NM_141095 // GO:0005665 // DNA-directed RNA polymerase II, core complex // inferred fro	FBtr0078432 // GO:0003899 // DNA-directed RNA polymerase activity // inferred from sequ	0.0746398	0.00916075	0.84097	-1.1891	-17 days down vs -24 days	2.96061	0.106908	0.0902754	1
6323	18164725	NM_001259343 // CG43191 // CG43191 gene product from transcript CG43191-RA // 48D8-48D8	CG43191	NM_001259343	NM_001259343 // GO:0008150 // biological_process // no biological data available /// F	NM_001259343 // GO:0005575 // cellular_component // no biological data available /// F	NM_001259343 // GO:0003674 // molecular_function // no biological data available /// F	0.153977	0.0418215	0.840738	-1.18943	-17 days down vs -24 days	2.11187	0.145795	0.172589	1
8356	18176443	NM_139685 // ATPsynCF6L // ATP synthase, coupling factor 6-like // 64C4-64C4 // 38592 /	ATPsynCF6L	NM_139685	NM_139685 // GO:0015986 // ATP synthesis coupled proton transport // inferred from elec	NM_139685 // GO:0000276 // mitochondrial proton-transporting ATP synthase complex, coup	NM_139685 // GO:0008553 // hydrogen-exporting ATPase activity, phosphorylative mechanis	0.0679433	0.00839056	0.840441	-1.18985	-17 days down vs -24 days	3.0787	0.10846	0.0880731	1
8614	18177855	NM_079327 // mRpL20 // mitochondrial ribosomal protein L20 // 69F5-69F5 // 39477 /// FB	mRpL20	NM_079327	NM_079327 // GO:0006412 // translation // inferred from sequence or structural similari	NM_079327 // GO:0005762 // mitochondrial large ribosomal subunit // inferred from seque	NM_079327 // GO:0003735 // structural constituent of ribosome // inferred from sequence	0.0246351	0.015314	0.840178	-1.19022	-17 days down vs -24 days	4.49078	0.199534	0.11108	1
6575	18166210	NM_001275239 // Rpn10 // Regulatory particle non-ATPase 10 // 78D5-78D5 // 40388 /// NM	Rpn10	NM_001275239	NM_001275239 // GO:0000070 // mitotic sister chromatid segregation // inferred from mut	NM_001275239 // GO:0000502 // proteasome complex // inferred from direct assay /// NM_	NM_001275239 // GO:0008270 // zinc ion binding // inferred from direct assay /// NM_00	0.1362	0.0238718	0.839773	-1.1908	-17 days down vs -24 days	2.24865	0.120961	0.134482	1
2688	18143847	NM_001299144 // CG10623 // CG10623 gene product from transcript CG10623-RC // 37B7-37B7	CG10623	NM_001299144	NM_001299144 // GO:0032259 // methylation // inferred from electronic annotation /// N	NM_001299144 // GO:0005829 // cytosol // --- /// NM_001299145 // GO:0005829 // cytosol	NM_001299144 // GO:0016205 // selenocysteine methyltransferase activity // inferred fro	0.0884693	0.0357918	0.839037	-1.19184	-17 days down vs -24 days	2.75196	0.180092	0.163603	1
9363	18181692	NR_048308 // CR43309 // ncRNA // 78F4-78F4 // 12798456	CR43309	NR_048308	---	---	---	0.0569708	0.0064725	0.838899	-1.19204	-17 days down vs -24 days	3.30537	0.108468	0.0820391	1
10286	18186883	NM_142434 // CG7988 // CG7988 gene product from transcript CG7988-RA // 90F7-90F7 // 42	CG7988	NM_142434	NM_142434 // GO:0007623 // circadian rhythm // inferred from sequence or structural sim	NM_142434 // GO:0005575 // cellular_component // no biological data available /// FBtr	NM_142434 // GO:0003674 // molecular_function // no biological data available /// FBtr	0.154951	0.0280378	0.838362	-1.1928	-17 days down vs -24 days	2.10492	0.124005	0.14728	1
14574	18211722	NR_047856 // mir-979 // mir-979 stem loop // 18D1-18D1 // 12798183	mir-979	NR_047856	---	---	---	0.0153897	0.00162224	0.838336	-1.19284	-17 days down vs -24 days	5.24283	0.11136	0.0531011	1
5950	18162631	NM_166059 // CG30076 // CG30076 gene product from transcript CG30076-RA // 51A8-51A8 //	CG30076	NM_166059	NM_166059 // GO:0008150 // biological_process // no biological data available /// FBtr	NM_166059 // GO:0005575 // cellular_component // no biological data available /// FBtr	NM_166059 // GO:0003674 // molecular_function // no biological data available /// FBtr	0.0957496	0.0231408	0.8382	-1.19303	-17 days down vs -24 days	2.65697	0.144043	0.135533	1
14996	18214262	NM_131933 // CG12693 // CG12693 gene product from transcript CG12693-RB // 4B6-4B6 // 3	CG12693	NM_131933	---	---	---	0.0892345	0.0205061	0.837544	-1.19397	-17 days down vs -24 days	2.74156	0.142367	0.129823	1
9842	18184661	NM_001275362 // RpL13A // Ribosomal protein L13A // 83B6-83B7 // 40687 /// NM_141303 //	RpL13A	NM_001275362	NM_001275362 // GO:0006412 // translation // inferred from sequence or structural simil	NM_001275362 // GO:0005840 // ribosome // inferred from direct assay /// NM_001275362	NM_001275362 // GO:0003735 // structural constituent of ribosome // inferred from direc	0.0154195	0.0310309	0.837329	-1.19427	-17 days down vs -24 days	5.2396	0.327949	0.156476	1
3916	18150859	NM_137223 // Cyp4aa1 // CG8302 gene product from transcript CG8302-RB // 52D3-52D4 // 3	Cyp4aa1	NM_137223	NM_137223 // GO:0042445 // hormone metabolic process // non-traceable author statement	NM_137223 // GO:0016020 // membrane // non-traceable author statement /// NM_137223 //	NM_137223 // GO:0004497 // monooxygenase activity // inferred from electronic annotatio	0.0390991	0.0110874	0.83709	-1.19461	-17 days down vs -24 days	3.81486	0.155896	0.102164	1
10758	18189529	NM_001300617 // CG14246 // CG14246 gene product from transcript CG14246-RC // 97C5-97C5	CG14246	NM_001300617	BT081357 // GO:0006030 // chitin metabolic process // inferred from electronic annotati	BT081357 // GO:0005576 // extracellular region // inferred from electronic annotation	BT081357 // GO:0008061 // chitin binding // inferred from electronic annotation	0.0512809	0.010268	0.836775	-1.19506	-17 days down vs -24 days	3.44426	0.137331	0.0996811	1
12051	18197310	NM_206486 // Kif19A // Kinesin family member 19A ortholog // 88A9-88A9 // 41717 /// FBt	Kif19A	NM_206486	NM_206486 // GO:0007018 // microtubule-based movement // inferred from electronic annot	NM_206486 // GO:0005871 // kinesin complex // inferred from electronic annotation ///	NM_206486 // GO:0003777 // microtubule motor activity // inferred from electronic annot	0.0635189	0.0179939	0.836607	-1.1953	-17 days down vs -24 days	3.16451	0.15756	0.124474	1
692	18132958	NM_001272913 // CG3544 // CG3544 gene product from transcript CG3544-RB // 21E2-21E2 //	CG3544	NM_001272913	NM_001272913 // GO:0005997 // xylulose metabolic process // inferred from sequence or s	NM_001272913 // GO:0070062 // extracellular exosome // inferred from sequence or struct	NM_001272913 // GO:0004856 // xylulokinase activity // inferred from sequence or struct	0.0678465	0.0286884	0.836317	-1.19572	-17 days down vs -24 days	3.0805	0.188499	0.152977	1
7087	18169217	NM_001038916 // Spt20 // CG17689 gene product from transcript CG17689-RA // 70B3-70B4 /	Spt20	NM_001038916	NM_001038916 // GO:0016573 // histone acetylation // inferred from sequence or structur	NM_001038916 // GO:0000124 // SAGA complex // inferred from direct assay /// NM_001038	NM_001038916 // GO:0003712 // transcription cofactor activity // inferred from sequence	0.0879924	0.0244422	0.835799	-1.19646	-17 days down vs -24 days	2.7585	0.15819	0.143366	1
4846	18155883	NM_001274002 // Aats-asp // Aspartyl-tRNA synthetase // 49D7-49D7 // 36420 /// NR_04809	Aats-asp	NM_001274002	NM_001274002 // GO:0006422 // aspartyl-tRNA aminoacylation // inferred from sequence or	NM_001274002 // GO:0005737 // cytoplasm // inferred from electronic annotation /// NM_	NM_001274002 // GO:0003676 // nucleic acid binding // inferred from electronic annotati	0.171275	0.0475233	0.835556	-1.19681	-17 days down vs -24 days	1.99524	0.157728	0.19763	1
4075	18151751	NM_001299698 // CG11099 // CG11099 gene product from transcript CG11099-RA // 56F10-56F	CG11099	NM_001299698	---	---	FBtr0086315 // GO:0005515 // protein binding // inferred from electronic annotation //	0.220557	0.0429026	0.835108	-1.19745	-17 days down vs -24 days	1.72529	0.130178	0.188632	1
6232	18164228	NR_033161 // CR42547 // ncRNA // 57F5-57F5 // 8673989	CR42547	NR_033161	---	---	---	0.0497477	0.0104724	0.835092	-1.19747	-17 days down vs -24 days	3.48483	0.143157	0.1027	1
7294	18170245	NM_140963 // zye // CG5847 gene product from transcript CG5847-RA // 77C2-77C2 // 40255	zye	NM_140963	NM_140963 // GO:0003383 // apical constriction // inferred from mutant phenotype /// N	NM_140963 // GO:0016324 // apical plasma membrane // inferred from direct assay /// FB	NM_140963 // GO:0005214 // structural constituent of chitin-based cuticle // inferred f	0.0106127	0.0120352	0.834681	-1.19806	-17 days down vs -24 days	5.88691	0.256305	0.108845	1
3656	18149393	NM_001299232 // CG1941 // CG1941 gene product from transcript CG1941-RC // 43E12-43E12	CG1941	NM_001299232	NM_001299232 // GO:0008152 // metabolic process // inferred from electronic annotation	NM_001299232 // GO:0016020 // membrane // inferred from electronic annotation /// NM_0	NM_001299232 // GO:0016747 // transferase activity, transferring acyl groups other than	0.228264	0.0348235	0.834249	-1.19868	-17 days down vs -24 days	1.68934	0.116336	0.172162	1
5634	18160926	NM_137460 // CG5726 // CG5726 gene product from transcript CG5726-RA // 55B12-55B12 //	CG5726	NM_137460	---	NM_137460 // GO:0005811 // lipid particle // inferred from direct assay /// FBtr008677	---	0.0303522	0.00256636	0.831616	-1.20248	-17 days down vs -24 days	4.17813	0.111521	0.066729	1
10529	18188294	NM_001260373 // Nup358 // Nucleoporin 358kD // 96C8-96C8 // 43041 /// NM_143104 // Nup3	Nup358	NM_001260373	NM_001260373 // GO:0006606 // protein import into nucleus // inferred from mutant pheno	NM_001260373 // GO:0005643 // nuclear pore // inferred from sequence or structural simi	NM_001260373 // GO:0008270 // zinc ion binding // inferred from electronic annotation	0.0855904	0.0365946	0.831164	-1.20313	-17 days down vs -24 days	2.79209	0.205064	0.183611	1
1971	18139703	NM_001299111 // Acp36DE // Accessory gland protein 36DE // 36F3-36F3 // 35096 /// NM_07	Acp36DE	NM_001299111	NM_001299111 // GO:0007321 // sperm displacement // non-traceable author statement ///	NM_001299111 // GO:0005576 // extracellular region // not recorded /// NM_001299111 //	NM_001299111 // GO:0005179 // hormone activity // non-traceable author statement /// N	0.19333	0.0250501	0.83085	-1.20359	-17 days down vs -24 days	1.86475	0.115379	0.154685	1
469	18131611	NM_001298670 // Sr-CI // Scavenger receptor class C, type I // 24D6-24D6 // 33621 /// N	Sr-CI	NM_001298670	NM_001298670 // GO:0006909 // phagocytosis // traceable author statement /// NM_001298	NM_001298670 // GO:0005887 // integral component of plasma membrane // non-traceable au	NM_001298670 // GO:0005044 // scavenger receptor activity // inferred from electronic a	0.00430855	0.0182034	0.829837	-1.20506	-17 days down vs -24 days	7.65699	0.418753	0.136723	1
13677	18206603	NM_132252 // Es2 // CG1474 gene product from transcript CG1474-RA // 7E11-7E11 // 31780	Es2	NM_132252	NM_132252 // GO:0000398 // mRNA splicing, via spliceosome // inferred by curator /// N	NM_132252 // GO:0005634 // nucleus // inferred from sequence or structural similarity	NM_132252 // GO:0004757 // sepiapterin reductase activity // inferred from sequence or	0.107101	0.0273184	0.829324	-1.2058	-17 days down vs -24 days	2.52456	0.165614	0.164003	1
11994	18197018	NM_141932 // Cyp9f2 // CG11466 gene product from transcript CG11466-RA // 87B9-87B9 //	Cyp9f2	NM_141932	NM_141932 // GO:0035220 // wing disc development // inferred from mutant phenotype ///	NM_141932 // GO:0016020 // membrane // non-traceable author statement /// NM_141932 //	NM_141932 // GO:0005506 // iron ion binding // inferred from electronic annotation ///	0.0829123	0.0260797	0.829277	-1.20587	-17 days down vs -24 days	2.83086	0.18199	0.160719	1
6757	18167334	NM_139459 // CG8993 // CG8993 gene product from transcript CG8993-RA // 62D7-62D7 // 38	CG8993	NM_139459	NM_139459 // GO:0006662 // glycerol ether metabolic process // inferred from electronic	NM_139459 // GO:0005739 // mitochondrion // inferred from sequence or structural simila	NM_139459 // GO:0015035 // protein disulfide oxidoreductase activity // inferred from e	0.180192	0.0396744	0.828617	-1.20683	-17 days down vs -24 days	1.94029	0.153227	0.197427	1
2528	18143068	NM_001273428 // CG7329 // CG7329 gene product from transcript CG7329-RB // 32A2-32A2 //	CG7329	NM_001273428	NM_001273428 // GO:0008152 // metabolic process // inferred from electronic annotation	---	NM_001273428 // GO:0004806 // triglyceride lipase activity // inferred from sequence or	0.198683	0.0425614	0.828148	-1.20751	-17 days down vs -24 days	1.83564	0.151056	0.205727	1
2579	18143322	NM_001273484 // CG5446 // CG5446 gene product from transcript CG5446-RC // 33E4-33E4 //	CG5446	NM_001273484	NM_001273484 // GO:0035220 // wing disc development // inferred from genetic interactio	---	---	0.00603786	0.00105374	0.827529	-1.20842	-17 days down vs -24 days	6.95761	0.150228	0.0539799	1
8359	18176455	NM_139691 // Prpk // p53-related protein kinase ortholog // 64C7-64C7 // 38600 /// FBtr	Prpk	NM_139691	NM_139691 // GO:0006468 // protein phosphorylation // inferred from sequence or structu	NM_139691 // GO:0005737 // cytoplasm // inferred from direct assay /// NM_139691 // GO	NM_139691 // GO:0004672 // protein kinase activity // non-traceable author statement /	0.159947	0.0413557	0.827426	-1.20857	-17 days down vs -24 days	2.06999	0.169451	0.204652	1
5083	18157553	NM_001299856 // ytr // yantar // 60A3-60A3 // 47457 /// NM_137995 // ytr // yantar // 6	ytr	NM_001299856	NM_001299856 // GO:0000398 // mRNA splicing, via spliceosome // inferred by curator //	NM_001299856 // GO:0071011 // precatalytic spliceosome // inferred from direct assay /	NM_001299856 // GO:0003729 // mRNA binding // non-traceable author statement /// NM_13	0.044596	0.0178234	0.827136	-1.20899	-17 days down vs -24 days	3.6328	0.203899	0.140318	1
4087	18151817	NM_137641 // CG13423 // CG13423 gene product from transcript CG13423-RA // 57A5-57A5 //	CG13423	NM_137641	NM_137641 // GO:0006508 // proteolysis // inferred from electronic annotation /// FBtr	---	NM_137641 // GO:0004197 // cysteine-type endopeptidase activity // inferred from sequen	0.0166578	0.017317	0.827023	-1.20916	-17 days down vs -24 days	5.11148	0.283923	0.138866	1
7554	18171577	NM_001274527 // CG32407 // CG32407 gene product from transcript CG32407-RA // 64F5-64F5	CG32407	NM_001274527	---	---	---	0.0606973	0.00984011	0.826963	-1.20924	-17 days down vs -24 days	3.223	0.14379	0.111534	1
510	18131880	NM_001316387 // emb // embargoed // 29C1-29C3 // 34167 /// NM_164818 // emb // embargoe	emb	NM_001316387	NM_001316387 // GO:0006611 // protein export from nucleus // inferred from mutant pheno	NM_001316387 // GO:0005634 // nucleus // inferred from direct assay /// NM_001316387 /	NM_001316387 // GO:0005049 // nuclear export signal receptor activity // inferred from	0.0828061	0.0104861	0.826157	-1.21042	-17 days down vs -24 days	2.83243	0.130725	0.115382	1
14037	18208524	NM_132493 // Cyp4g15 // CG11715 gene product from transcript CG11715-RC // 10B15-10B15	Cyp4g15	NM_132493	NM_132493 // GO:0006694 // steroid biosynthetic process // non-traceable author stateme	NM_132493 // GO:0016020 // membrane // non-traceable author statement /// NM_132493 //	NM_132493 // GO:0005506 // iron ion binding // inferred from electronic annotation ///	0.188852	0.0462753	0.825966	-1.2107	-17 days down vs -24 days	1.88982	0.166887	0.220771	1
4574	18154269	NM_137482 // GstE4 // Glutathione S transferase E4 // 55C7-55C7 // 37109 /// FBtr008667	GstE4	NM_137482	NM_137482 // GO:0006749 // glutathione metabolic process // inferred from direct assay	NM_137482 // GO:0005737 // cytoplasm // inferred from sequence or structural similarity	NM_137482 // GO:0004364 // glutathione transferase activity // inferred from direct ass	0.0180579	0.00946189	0.825279	-1.21171	-17 days down vs -24 days	4.97962	0.223691	0.112303	1
5241	18158734	NM_001273849 // CG1603 // CG1603 gene product from transcript CG1603-RB // 43D1-43D1 //	CG1603	NM_001273849	NM_001273849 // GO:0046579 // positive regulation of Ras protein signal transduction //	---	NM_001273849 // GO:0003676 // nucleic acid binding // inferred from electronic annotati	0.0264626	0.00888996	0.825228	-1.21179	-17 days down vs -24 days	4.38218	0.192532	0.109838	1
4975	18156714	NM_001274045 // LamC // Lamin C // 51B1-51B1 // 36615 /// NM_079018 // LamC // Lamin C	LamC	NM_001274045	NM_001274045 // GO:0006325 // chromatin organization // inferred from mutant phenotype	NM_001274045 // GO:0005635 // nuclear envelope // inferred from direct assay /// NM_00	NM_001274045 // GO:0005198 // structural molecule activity // inferred from mutant phen	0.0377063	0.0279384	0.824548	-1.21279	-17 days down vs -24 days	3.86584	0.272252	0.176062	1
14885	18213594	NM_130617 // CG4281 // CG4281 gene product from transcript CG4281-RA // 2C8-2C8 // 3117	CG4281	NM_130617	---	---	---	0.0568163	0.00982952	0.824493	-1.21287	-17 days down vs -24 days	3.30892	0.152248	0.115028	1
9172	18180626	NM_167858 // CG32335 // CG32335 gene product from transcript CG32335-RB // 61F3-61F3 //	CG32335	NM_167858	NM_167858 // GO:0008150 // biological_process // no biological data available /// NM_1	NM_167858 // GO:0005634 // nucleus // inferred from electronic annotation /// NM_16785	NM_167858 // GO:0008270 // zinc ion binding // inferred from sequence or structural sim	0.0253263	0.0446407	0.823463	-1.21438	-17 days down vs -24 days	4.44861	0.397982	0.223656	1
13921	18207983	NM_132151 // CG14427 // CG14427 gene product from transcript CG14427-RA // 6F1-6F1 // 3	CG14427	NM_132151	---	---	---	0.0281567	0.0343511	0.823189	-1.21479	-17 days down vs -24 days	4.28919	0.338263	0.19716	1
3053	18145728	NM_135129 // Vm26Ac // Vitelline membrane 26Aac // 26A3-26A3 // 33828 /// FBtr0079240 /	Vm26Ac	NM_135129	NM_135129 // GO:0007305 // vitelline membrane formation involved in chorion-containing	NM_135129 // GO:0035805 // egg coat // not recorded /// NM_135129 // GO:0042600 // cho	NM_135129 // GO:0008316 // structural constituent of vitelline membrane // not recorded	0.152582	0.0338917	0.822917	-1.21519	-17 days down vs -24 days	2.12193	0.16684	0.196566	1
15019	18214375	NM_132017 // CG3160 // CG3160 gene product from transcript CG3160-RA // 5A12-5A13 // 31	CG3160	NM_132017	NM_132017 // GO:0006505 // GPI anchor metabolic process // inferred from electronic ann	NM_132017 // GO:0005783 // endoplasmic reticulum // inferred from sequence or structura	NM_132017 // GO:0004518 // nuclease activity // inferred from sequence or structural si	0.0614997	0.0386486	0.822791	-1.21538	-17 days down vs -24 days	3.20605	0.269043	0.209793	1
13238	18203842	---		---	---	---	---	0.0807845	0.009431	0.822485	-1.21583	-17 days down vs -24 days	2.86273	0.133019	0.116164	1
3896	18150716	NM_137158 // Cyp6a20 // CG10245 gene product from transcript CG10245-RB // 51D1-51D1 //	Cyp6a20	NM_137158	NM_137158 // GO:0002118 // aggressive behavior // inferred from mutant phenotype /// N	NM_137158 // GO:0016020 // membrane // non-traceable author statement /// NM_137158 //	NM_137158 // GO:0005506 // iron ion binding // inferred from electronic annotation ///	0.21489	0.0410957	0.822342	-1.21604	-17 days down vs -24 days	1.75265	0.152478	0.217496	1
14708	18212538	NM_001297856 // sta // stubarista // 2B1-2B1 // 31106 /// NM_057402 // sta // stubarist	sta	NM_001297856	NM_001297856 // GO:0000022 // mitotic spindle elongation // inferred from mutant phenot	NM_001297856 // GO:0005840 // ribosome // inferred from direct assay /// NM_001297856	NM_001297856 // GO:0003735 // structural constituent of ribosome // not recorded /// N	0.140874	0.0270651	0.822029	-1.2165	-17 days down vs -24 days	2.21077	0.15838	0.1791	1
5779	18161720	NM_137851 // CG2852 // CG2852 gene product from transcript CG2852-RD // 58F3-58F3 // 37	CG2852	NM_137851	NM_137851 // GO:0000413 // protein peptidyl-prolyl isomerization // inferred from elect	NM_137851 // GO:0005576 // extracellular region // inferred from direct assay /// NM_1	NM_137851 // GO:0003755 // peptidyl-prolyl cis-trans isomerase activity // inferred fro	0.0864427	0.0289526	0.822018	-1.21652	-17 days down vs -24 days	2.78005	0.205382	0.184693	1
12226	18198293	NM_142542 // CG3581 // CG3581 gene product from transcript CG3581-RA // 92A3-92A3 // 42	CG3581	NM_142542	NM_142542 // GO:0008150 // biological_process // no biological data available /// FBtr	NM_142542 // GO:0005575 // cellular_component // no biological data available /// FBtr	NM_142542 // GO:0003674 // molecular_function // no biological data available /// FBtr	0.140809	0.0259941	0.821641	-1.21708	-17 days down vs -24 days	2.21129	0.156325	0.176735	1
4038	18151536	NM_001202045 // CG18605 // CG18605 gene product from transcript CG18605-RB // 56A2-56A2	CG18605	NM_001202045	NM_001202045 // GO:0006511 // ubiquitin-dependent protein catabolic process // inferred	NM_001202045 // GO:0000151 // ubiquitin ligase complex // inferred from sequence or str	NM_001202045 // GO:0003677 // DNA binding // inferred from sequence or structural simil	0.0645237	0.00675866	0.820846	-1.21826	-17 days down vs -24 days	3.14442	0.132307	0.105192	1
14903	18213716	NM_143750 // Nsun2 // NOP2-Sun domain family, member 2 ortholog // 4A5-4A6 // 45064 ///	Nsun2	NM_143750	NM_143750 // GO:0001510 // RNA methylation // inferred from sequence or structural simi	NM_143750 // GO:0005634 // nucleus // inferred from direct assay /// NM_143750 // GO:0	NM_143750 // GO:0003723 // RNA binding // inferred from electronic annotation /// NM_1	0.107293	0.0162535	0.819987	-1.21953	-17 days down vs -24 days	2.52246	0.149105	0.147777	1
14316	18210022	NM_134565 // CG15450 // CG15450 gene product from transcript CG15450-RA // 19E3-19E3 //	CG15450	NM_134565	NM_134565 // GO:0008152 // metabolic process // inferred from electronic annotation //	NM_134565 // GO:0016020 // membrane // inferred from electronic annotation /// NM_1345	NM_134565 // GO:0003841 // 1-acylglycerol-3-phosphate O-acyltransferase activity // inf	0.247477	0.040583	0.818042	-1.22243	-17 days down vs -24 days	1.60535	0.14633	0.22788	1
12448	18199538	NM_001170257 // CG10669 // CG10669 gene product from transcript CG10669-RB // 96D1-96D1	CG10669	NM_001170257	---	NM_001170257 // GO:0005634 // nucleus // inferred from electronic annotation /// NM_14	NM_001170257 // GO:0003676 // nucleic acid binding // inferred from electronic annotati	0.0400436	0.00536918	0.817828	-1.22275	-17 days down vs -24 days	3.78149	0.152524	0.100836	1
12115	18197679	NM_142264 // CG10185 // CG10185 gene product from transcript CG10185-RA // 89B2-89B2 //	CG10185	NM_142264	NM_142264 // GO:0008150 // biological_process // no biological data available /// FBtr	NM_142264 // GO:0005575 // cellular_component // no biological data available /// FBtr	NM_142264 // GO:0003674 // molecular_function // no biological data available /// FBtr	0.00249687	0.00157917	0.817734	-1.22289	-17 days down vs -24 days	8.89059	0.243937	0.0685941	1
4259	18152714	NM_001259562 // CG3376 // CG3376 gene product from transcript CG3376-RB // 60C4-60C4 //	CG3376	NM_001259562	NM_001259562 // GO:0006685 // sphingomyelin catabolic process // inferred from electron	NM_001259562 // GO:0016020 // membrane // inferred from electronic annotation /// NM_0	NM_001259562 // GO:0004767 // sphingomyelin phosphodiesterase activity // inferred from	0.0115542	0.00387862	0.816855	-1.22421	-17 days down vs -24 days	5.73549	0.21012	0.0915875	1
10743	18189457	NM_080260 // pins // partner of inscuteable // 98A8-98A8 // 53569 /// FBtr0085189 // pi	pins	NM_080260	NM_080260 // GO:0000132 // establishment of mitotic spindle orientation // inferred fro	NM_080260 // GO:0005938 // cell cortex // inferred from direct assay /// NM_080260 //	NM_080260 // GO:0005515 // protein binding // inferred from physical interaction /// N	0.191297	0.0360914	0.816748	-1.22437	-17 days down vs -24 days	1.87605	0.16399	0.21853	1
5601	18160766	NM_001299602 // insb // insensible // 54B16-54B16 // 36967 /// NM_137372 // insb // ins	insb	NM_001299602	NM_001299602 // GO:0045746 // negative regulation of Notch signaling pathway // inferre	NM_001299602 // GO:0005634 // nucleus // inferred from direct assay /// NM_137372 // G	NM_001299602 // GO:0003674 // molecular_function // no biological data available /// N	0.0584702	0.0407091	0.816578	-1.22462	-17 days down vs -24 days	3.27149	0.304015	0.232322	1
10783	18189684	NM_001144615 // CG5180 // CG5180 gene product from transcript CG5180-RC // 92F1-92F1 //	CG5180	NM_001144615	---	---	---	0.0451765	0.00456416	0.814788	-1.22731	-17 days down vs -24 days	3.61514	0.14324	0.0990555	1
4058	18151687	NM_001299688 // CG11007 // CG11007 gene product from transcript CG11007-RB // 56D14-56D	CG11007	NM_001299688	NM_001299688 // GO:0045454 // cell redox homeostasis // inferred from electronic annota	NM_001299688 // GO:0005575 // cellular_component // no biological data available /// N	NM_001299688 // GO:0003674 // molecular_function // no biological data available /// N	0.00919997	0.0166775	0.813895	-1.22866	-17 days down vs -24 days	6.14708	0.395286	0.160762	1
334	18130728	NM_001259054 // salr // spalt-related // 32E4-32F1 // 34568 /// NM_078824 // salr // sp	salr	NM_001259054	NM_001259054 // GO:0006355 // regulation of transcription, DNA-templated // inferred fr	NM_001259054 // GO:0005634 // nucleus // inferred from direct assay /// NM_001259054 /	NM_001259054 // GO:0003676 // nucleic acid binding // inferred from electronic annotati	0.0888376	0.0200468	0.813565	-1.22916	-17 days down vs -24 days	2.74694	0.191381	0.174176	1
13755	18207080	NM_001169163 // CG14777 // CG14777 gene product from transcript CG14777-RF // 2A4-2A4 /	CG14777	NM_001169163	---	NM_001169163 // GO:0016021 // integral component of membrane // inferred from electroni	---	0.124271	0.0357015	0.813387	-1.22943	-17 days down vs -24 days	2.3526	0.21299	0.226334	1
9681	18183694	NM_079730 // klg // klingon // 94D3-94D4|3-78.1 cM // 42707 /// FBtr0084337 // klg // k	klg	NM_079730	NM_079730 // GO:0007156 // homophilic cell adhesion via plasma membrane adhesion molecu	NM_079730 // GO:0019897 // extrinsic component of plasma membrane // inferred from sequ	NM_079730 // GO:0005515 // protein binding // inferred from physical interaction /// F	0.0198775	0.0095801	0.812994	-1.23002	-17 days down vs -24 days	4.82541	0.2531	0.131128	1
10628	18188811	NM_001202376 // CG9990 // CG9990 gene product from transcript CG9990-RA // 98E1-98E2 //	CG9990	NM_001202376	NM_001202376 // GO:0006810 // transport // inferred from electronic annotation /// NM_	NM_001202376 // GO:0005886 // plasma membrane // inferred from direct assay /// NM_001	NM_001202376 // GO:0005215 // transporter activity // inferred from sequence or structu	0.0260333	0.0140928	0.812942	-1.2301	-17 days down vs -24 days	4.40687	0.267935	0.151998	1
14160	18209114	NM_001298356 // CG15601 // CG15601 gene product from transcript CG15601-RB // 13E8-13E8	CG15601	NM_001298356	NM_001298356 // GO:0008150 // biological_process // no biological data available /// N	NM_001298356 // GO:0005575 // cellular_component // no biological data available /// N	NM_001298356 // GO:0003674 // molecular_function // no biological data available /// N	0.087542	0.0388348	0.811805	-1.23182	-17 days down vs -24 days	2.76472	0.265716	0.240274	1
6626	18166516	NM_001274543 // Trn // Transportin // 65A8-65A8 // 38721 /// NM_058020 // Trn // Transp	Trn	NM_001274543	NM_001274543 // GO:0006606 // protein import into nucleus // inferred from sequence or	NM_001274543 // GO:0005643 // nuclear pore // inferred from sequence or structural simi	NM_001274543 // GO:0008320 // protein transmembrane transporter activity // inferred fr	0.144889	0.0216268	0.811225	-1.2327	-17 days down vs -24 days	2.17938	0.161225	0.184944	1
15043	18214488	NM_001272358 // CG14440 // CG14440 gene product from transcript CG14440-RA // 6C7-6C7 /	CG14440	NM_001272358	---	---	---	0.0122488	0.0018419	0.811089	-1.23291	-17 days down vs -24 days	5.63294	0.1752	0.0777567	1
14120	18208939	NM_132713 // CG11584 // CG11584 gene product from transcript CG11584-RB // 12E2-12E2 //	CG11584	NM_132713	NM_132713 // GO:0048813 // dendrite morphogenesis // inferred from sequence or structur	NM_132713 // GO:0005874 // microtubule // inferred from sequence or structural similari	NM_132713 // GO:0008017 // microtubule binding // inferred from sequence or structural	0.00887505	0.00993485	0.81093	-1.23315	-17 days down vs -24 days	6.21371	0.338496	0.136189	1
7452	18171060	NM_001274750 // S-Lap3 // Sperm-Leucylaminopeptidase 3 // 67E3-67E4 // 326187 /// NM_14	S-Lap3	NM_001274750	NM_001274750 // GO:0006508 // proteolysis // inferred from electronic annotation /// N	NM_001274750 // GO:0005737 // cytoplasm // inferred from electronic annotation /// NM_	NM_001274750 // GO:0004177 // aminopeptidase activity // inferred from sequence or stru	0.003092	0.0013924	0.810151	-1.23434	-17 days down vs -24 days	8.39135	0.242888	0.0723626	1
13570	18205817	NM_001042794 // sgg // shaggy // 3A8-3B1|1-1.3 cM // 31248 /// NM_001103400 // sgg // s	sgg	NM_001042794	NM_001042794 // GO:0003382 // epithelial cell morphogenesis // inferred from genetic in	NM_001042794 // GO:0005634 // nucleus // inferred from direct assay /// NM_001042794 /	NM_001042794 // GO:0004672 // protein kinase activity // inferred from direct assay //	0.00171612	0.00179652	0.808998	-1.2361	-17 days down vs -24 days	9.81881	0.310636	0.079092	1
15582	18217238	NM_167580 // CG32554 // CG32554 gene product from transcript CG32554-RA // 16E1-16E1 //	CG32554	NM_167580	NM_167580 // GO:0008150 // biological_process // no biological data available /// FBtr	NM_167580 // GO:0005575 // cellular_component // no biological data available /// FBtr	NM_167580 // GO:0003674 // molecular_function // no biological data available /// FBtr	0.0539089	0.0241033	0.808437	-1.23695	-17 days down vs -24 days	3.37796	0.270613	0.200278	1
11391	18193421	NM_079831 // Jon99Ci // Jonah 99Ci // 99C7-99C7 // 43545 /// FBtr0085511 // Jon99Ci //	Jon99Ci	NM_079831	NM_079831 // GO:0006508 // proteolysis // inferred from electronic annotation /// NM_0	---	NM_079831 // GO:0004175 // endopeptidase activity // not recorded /// NM_079831 // GO:	0.0912604	0.0140938	0.807561	-1.2383	-17 days down vs -24 days	2.7145	0.175799	0.161908	1
10378	18187406	NM_142708 // CG17298 // CG17298 gene product from transcript CG17298-RA // 93D3-93D3 //	CG17298	NM_142708	---	---	---	0.0342334	0.0129383	0.80736	-1.2386	-17 days down vs -24 days	4.00336	0.251326	0.156947	1
12360	18199035	NM_001202343 // CG16732 // CG16732 gene product from transcript CG16732-RB // 95A1-95A1	CG16732	NM_001202343	NM_001202343 // GO:0008152 // metabolic process // inferred from electronic annotation	NM_001202343 // GO:0016020 // membrane // inferred from electronic annotation /// NM_0	NM_001202343 // GO:0003851 // 2-hydroxyacylsphingosine 1-beta-galactosyltransferase act	0.229904	0.0276908	0.806904	-1.23931	-17 days down vs -24 days	1.68186	0.145905	0.21688	1
7937	18173886	NM_079458 // Ide // Insulin degrading metalloproteinase // 77B6-77B6 // 40248 /// FBtr0	Ide	NM_079458	NM_079458 // GO:0002021 // response to dietary excess // inferred from mutant phenotype	NM_079458 // GO:0005737 // cytoplasm // inferred from direct assay /// NM_079458 // GO	NM_079458 // GO:0004222 // metalloendopeptidase activity // inferred from sequence or s	0.0571676	0.00944845	0.805856	-1.24092	-17 days down vs -24 days	3.30086	0.187242	0.141813	1
13610	18206183	NM_001258602 // CanB // Calcineurin B // 4F5-4F5 // 44317 /// NM_080002 // CanB // Calc	CanB	NM_001258602	NM_001258602 // GO:0006470 // protein dephosphorylation // inferred from sequence or st	NM_001258602 // GO:0005955 // calcineurin complex // inferred from sequence or structur	NM_001258602 // GO:0005509 // calcium ion binding // inferred from electronic annotatio	0.00226427	0.000808026	0.804221	-1.24344	-17 days down vs -24 days	9.12606	0.242148	0.0663342	1
9101	18180262	NM_168145 // QC // Glutaminyl cyclase // 64F4-64F5 // 38663 /// FBtr0077080 // QC // Gl	QC	NM_168145	NM_168145 // GO:0017186 // peptidyl-pyroglutamic acid biosynthetic process, using gluta	NM_168145 // GO:0005576 // extracellular region // inferred from direct assay /// FBtr	NM_168145 // GO:0016603 // glutaminyl-peptide cyclotransferase activity // inferred fro	0.139764	0.02445	0.803917	-1.24391	-17 days down vs -24 days	2.21964	0.1885	0.212309	1
15103	18214741	NM_001272412 // CG12111 // CG12111 gene product from transcript CG12111-RB // 7F4-7F5 /	CG12111	NM_001272412	---	---	NM_001272412 // GO:0030246 // carbohydrate binding // inferred from sequence or structu	0.162256	0.0376554	0.803716	-1.24422	-17 days down vs -24 days	2.05427	0.213599	0.259945	1
15543	18217015	NM_144273 // CG15036 // CG15036 gene product from transcript CG15036-RA // 7B2-7B2 // 5	CG15036	NM_144273	---	---	---	0.0626558	0.0135366	0.803028	-1.24529	-17 days down vs -24 days	3.18207	0.21367	0.16787	1
4203	18152409	NM_137929 // CG13540 // CG13540 gene product from transcript CG13540-RB // 59D4-59D4 //	CG13540	NM_137929	NM_137929 // GO:0008150 // biological_process // no biological data available /// FBtr	NM_137929 // GO:0005575 // cellular_component // no biological data available /// FBtr	NM_137929 // GO:0003674 // molecular_function // no biological data available /// FBtr	0.017799	0.0016717	0.802858	-1.24555	-17 days down vs -24 days	5.00307	0.166252	0.0830748	1
1047	18134909	NM_135614 // CG17134 // CG17134 gene product from transcript CG17134-RA // 32B1-32B1 //	CG17134	NM_135614	NM_135614 // GO:0006508 // proteolysis // inferred from electronic annotation /// NM_1	---	NM_135614 // GO:0004190 // aspartic-type endopeptidase activity // inferred from sequen	0.204031	0.0335274	0.802257	-1.24648	-17 days down vs -24 days	1.80743	0.180679	0.249911	1
11151	18191913	NR_037752 // CR42721 // ncRNA // 84A5-84A5 // 10178845 /// NR_048332 // CR42721 // ncRN	CR42721	NR_037752	---	---	---	0.102883	0.0164214	0.802246	-1.2465	-17 days down vs -24 days	2.57176	0.188156	0.182906	1
5089	18157614	NM_080223 // Cht4 // Chitinase 4 // 57B16-57B16 // 49815 /// FBtr0071543 // Cht4 // Chi	Cht4	NM_080223	NM_080223 // GO:0005975 // carbohydrate metabolic process // inferred from electronic a	NM_080223 // GO:0005615 // extracellular space // inferred from direct assay /// NM_08	NM_080223 // GO:0004568 // chitinase activity // inferred from direct assay /// NM_080	0.0453423	0.0287247	0.801529	-1.24761	-17 days down vs -24 days	3.61015	0.3386	0.234478	1
11786	18195763	NM_141414 // sowi // solwind // 84A1-84A1 // 40809 /// FBtr0081701 // sowi // solwind /	sowi	NM_141414	---	---	NM_141414 // GO:0005509 // calcium ion binding // inferred from electronic annotation	0.0419841	0.0194818	0.800621	-1.24903	-17 days down vs -24 days	3.71578	0.297096	0.199888	1
10684	18189127	NM_143501 // CG11504 // CG11504 gene product from transcript CG11504-RB // 99D1-99D1 //	CG11504	NM_143501	---	---	---	0.0352735	0.0285795	0.800112	-1.24983	-17 days down vs -24 days	3.9605	0.376556	0.237695	1
14462	18210813	NM_167003 // GlcAT-I // CG32775 gene product from transcript CG32775-RA // 4B1-4B1 // 2	GlcAT-I	NM_167003	NM_167003 // GO:0015012 // heparan sulfate proteoglycan biosynthetic process // non-tra	NM_167003 // GO:0005886 // plasma membrane // inferred from sequence or structural simi	NM_167003 // GO:0015018 // galactosylgalactosylxylosylprotein 3-beta-glucuronosyltransf	0.0260456	0.0139632	0.799134	-1.25135	-17 days down vs -24 days	4.40616	0.312906	0.177539	1
15605	18217347	NM_167261 // Rab9Fb // Rab at 9Fb // 9F13-9F13 // 32029 /// FBtr0073401 // Rab9Fb // Ra	Rab9Fb	NM_167261	NM_167261 // GO:0015031 // protein transport // inferred from electronic annotation //	NM_167261 // GO:0031982 // vesicle // inferred from sequence or structural similarity	NM_167261 // GO:0003924 // GTPase activity // inferred from sequence or structural simi	0.10226	0.0225791	0.798366	-1.25256	-17 days down vs -24 days	2.57891	0.225176	0.218286	1
2019	18140051	NM_001298940 // Rab6 // CG6601 gene product from transcript CG6601-RB // 33C4-33C4 // 3	Rab6	NM_001298940	NM_001298940 // GO:0001745 // compound eye morphogenesis // inferred from genetic inter	NM_001298940 // GO:0005794 // Golgi apparatus // inferred from direct assay /// NM_001	NM_001298940 // GO:0003924 // GTPase activity // inferred from direct assay /// NM_001	0.02269	0.00384499	0.796002	-1.25628	-17 days down vs -24 days	4.61742	0.214563	0.11617	1
8436	18176868	NM_139887 // CG7506 // CG7506 gene product from transcript CG7506-RA // 66A8-66A8 // 38	CG7506	NM_139887	NM_139887 // GO:0033615 // mitochondrial proton-transporting ATP synthase complex assem	NM_139887 // GO:0032592 // integral component of mitochondrial membrane // inferred fro	NM_139887 // GO:0003674 // molecular_function // no biological data available /// FBtr	0.0913497	0.0130933	0.795662	-1.25681	-17 days down vs -24 days	2.71332	0.195269	0.179917	1
5681	18161210	NM_137605 // CG13872 // CG13872 gene product from transcript CG13872-RA // 56E4-56E4 //	CG13872	NM_137605	---	---	---	0.0516398	0.0154135	0.793936	-1.25955	-17 days down vs -24 days	3.43497	0.268678	0.195546	1
11861	18196143	NM_001170096 // CG8861 // CG8861 gene product from transcript CG8861-RC // 85D8-85D11 /	CG8861	NM_001170096	---	NM_001170096 // GO:0016020 // membrane // inferred from electronic annotation /// NM_0	---	0.0151432	0.0076327	0.793569	-1.26013	-17 days down vs -24 days	5.26987	0.317502	0.150621	1
11338	18193048	NM_001144554 // grn // grain // 84F1-84F1|3-47 cM // 40962 /// NM_001275437 // grn // g	grn	NM_001144554	NM_001144554 // GO:0006357 // regulation of transcription from RNA polymerase II promot	NM_001144554 // GO:0005634 // nucleus // inferred from sequence or structural similarit	NM_001144554 // GO:0000981 // RNA polymerase II transcription factor activity, sequence	0.0108389	0.00180487	0.791921	-1.26275	-17 days down vs -24 days	5.8491	0.224486	0.0959489	1
9599	18183119	NM_079522 // TfIIFalpha // Transcription factor IIFalpha // 83E5-83E5 // 40790 /// FBtr	TfIIFalpha	NM_079522	NM_079522 // GO:0006366 // transcription from RNA polymerase II promoter // non-traceab	NM_079522 // GO:0005634 // nucleus // inferred from direct assay /// NM_079522 // GO:0	NM_079522 // GO:0001096 // TFIIF-class transcription factor binding // inferred from ph	0.0350173	0.0105513	0.791232	-1.26385	-17 days down vs -24 days	3.97092	0.276189	0.173882	1
15140	18214925	NM_001298152 // Ipod // Interaction partner of Dnmt2 // 9B4-9B4 // 31954 /// NM_0012981	Ipod	NM_001298152	NM_001298152 // GO:0006306 // DNA methylation // non-traceable author statement /// NM	NM_001298152 // GO:0005575 // cellular_component // no biological data available /// N	NM_001298152 // GO:0003674 // molecular_function // no biological data available /// N	0.00336914	0.00198897	0.789142	-1.2672	-17 days down vs -24 days	8.19674	0.333761	0.101797	1
11631	18194929	NM_001300245 // CG45100 // CG45100 gene product from transcript CG45100-RA // 83A4-83A4	CG45100	NM_001300245	NM_001300245 // GO:0008150 // biological_process // no biological data available /// N	NM_001300245 // GO:0005575 // cellular_component // no biological data available /// N	NM_001300245 // GO:0003674 // molecular_function // no biological data available /// N	0.01161	0.0056352	0.786428	-1.27157	-17 days down vs -24 days	5.72698	0.335155	0.146305	1
5309	18159139	NM_136599 // PPO2 // Prophenoloxidase 2 // 45A1-45A1 // 35910 /// FBtr0088663 // PPO2 /	PPO2	NM_136599	NM_136599 // GO:0035006 // melanization defense response // inferred from genetic inter	NM_136599 // GO:0005576 // extracellular region // inferred from direct assay /// NM_1	NM_136599 // GO:0036263 // L-DOPA monooxygenase activity // inferred from direct assay	0.159349	0.0489682	0.785411	-1.27322	-17 days down vs -24 days	2.0741	0.301075	0.362897	1
13363	18204902	---		---	---	---	---	0.0257726	0.00557965	0.784521	-1.27466	-17 days down vs -24 days	4.4221	0.263157	0.148774	1
5384	18159586	NM_001201976 // Cpr47Ef // Cuticular protein 47Ef // 47E4-47E5 // 36194 /// NM_136816 /	Cpr47Ef	NM_001201976	NM_001201976 // GO:0040003 // chitin-based cuticle development // not recorded /// NM_	NM_001201976 // GO:0031012 // extracellular matrix // not recorded /// NM_001201976 //	NM_001201976 // GO:0005214 // structural constituent of chitin-based cuticle // inferre	0.0487388	0.0145685	0.784316	-1.275	-17 days down vs -24 days	3.51234	0.297758	0.211937	1
6833	18167827	NM_139653 // CG11350 // CG11350 gene product from transcript CG11350-RC // 64B8-64B8 //	CG11350	NM_139653	NM_139653 // GO:0022008 // neurogenesis // inferred from mutant phenotype /// FBtr0331	---	---	0.0864577	0.0281558	0.780013	-1.28203	-17 days down vs -24 days	2.77984	0.325821	0.293022	1
1123	18135289	NM_135951 // CG4580 // CG4580 gene product from transcript CG4580-RA // 36A2-36A2 // 34	CG4580	NM_135951	NM_135951 // GO:0006508 // proteolysis // inferred from electronic annotation /// FBtr	---	NM_135951 // GO:0004222 // metalloendopeptidase activity // inferred from electronic an	0.0498558	0.00879306	0.778796	-1.28403	-17 days down vs -24 days	3.48192	0.258084	0.185303	1
4603	18154328	NR_003794 // snoRNA:Me18S-C1366 // ncRNA // 51B6-51B6 // 5740601	snoRNA:Me18S-C1366	NR_003794	---	---	---	0.142071	0.0151727	0.778435	-1.28463	-17 days down vs -24 days	2.2013	0.201591	0.228944	1
4777	18155485	NM_001202029 // CG44243 // CG44243 gene product from transcript CG44243-RA // 52F7-52F8	CG44243	NM_001202029	NM_001202029 // GO:0009249 // protein lipoylation // inferred from sequence or structur	NM_001202029 // GO:0005575 // cellular_component // no biological data available /// N	NM_001202029 // GO:0017118 // lipoyltransferase activity // inferred from sequence or s	0.0989124	0.0178036	0.774404	-1.29132	-17 days down vs -24 days	2.6183	0.266558	0.254515	1
612	18132555	NM_136087 // robl37BC // CG15171 gene product from transcript CG15171-RA // 37B9-37B9 /	robl37BC	NM_136087	NM_136087 // GO:0007018 // microtubule-based movement // inferred from sequence or stru	NM_136087 // GO:0030286 // dynein complex // inferred from sequence or structural simil	NM_136087 // GO:0042623 // ATPase activity, coupled // inferred from sequence or struct	0.136204	0.0187957	0.77124	-1.29661	-17 days down vs -24 days	2.24862	0.24168	0.268698	1
13603	18206130	NM_078596 // yl // yolkless // 12E3-12E3|1-48 cM // 32367 /// NM_206710 // yl // yolkle	yl	NM_078596	NM_078596 // GO:0007296 // vitellogenesis // non-traceable author statement /// NM_078	NM_078596 // GO:0030135 // coated vesicle // inferred from direct assay /// NM_078596	NM_078596 // GO:0005509 // calcium ion binding // inferred from electronic annotation	0.00528961	0.00210585	0.771091	-1.29686	-17 days down vs -24 days	7.22632	0.360756	0.124806	1
6942	18168483	NM_079261 // Tsp66E // Tetraspanin 66E // 66E3-66E4 // 39017 /// NM_168298 // Tsp66E //	Tsp66E	NM_079261	NM_079261 // GO:0007166 // cell surface receptor signaling pathway // --- /// NM_079261	NM_079261 // GO:0005886 // plasma membrane // inferred from direct assay /// NM_079261	NM_079261 // GO:0003674 // molecular_function // no biological data available /// NM_1	0.117427	0.0217169	0.770953	-1.2971	-17 days down vs -24 days	2.41762	0.276995	0.286434	1
8563	18177590	NM_140247 // Muc68D // Mucin 68D // 68D4-68D4 // 39326 /// FBtr0076119 // Muc68D // Muc	Muc68D	NM_140247	NM_140247 // GO:0006030 // chitin metabolic process // inferred from electronic annotat	NM_140247 // GO:0005576 // extracellular region // inferred from electronic annotation	NM_140247 // GO:0005201 // extracellular matrix structural constituent // not recorded	0.0305359	0.00553386	0.769924	-1.29883	-17 days down vs -24 days	4.16926	0.287195	0.172209	1
7905	18173651	NR_073924 // CR43887 // ncRNA // 68D2-68D2 // 14462848	CR43887	NR_073924	---	---	---	0.0613851	0.0248803	0.769504	-1.29954	-17 days down vs -24 days	3.20845	0.395686	0.308315	1
7689	18172209	NR_003868 // snoRNA:Me28S-A774a // ncRNA // 69F5-69F5 // 5740171	snoRNA:Me28S-A774a	NR_003868	---	---	---	0.220754	0.0287698	0.767517	-1.3029	-17 days down vs -24 days	1.72436	0.231505	0.33564	1
7690	18172210	---		---	---	---	---	0.220754	0.0287698	0.767517	-1.3029	-17 days down vs -24 days	1.72436	0.231505	0.33564	1
13496	18205231	---		---	---	---	---	0.0352178	0.0164438	0.765935	-1.30559	-17 days down vs -24 days	3.96275	0.42486	0.268033	1
10118	18185998	NM_141986 // CG7091 // CG7091 gene product from transcript CG7091-RB // 87D6-87D6 // 41	CG7091	NM_141986	NM_141986 // GO:0055085 // transmembrane transport // inferred from electronic annotati	NM_141986 // GO:0016021 // integral component of membrane // inferred from electronic a	NM_141986 // GO:0005316 // high-affinity inorganic phosphate:sodium symporter activity	0.00855222	0.00793305	0.765824	-1.30578	-17 days down vs -24 days	6.28286	0.511024	0.203341	1
213	18130419	---		---	---	---	---	0.0962835	0.0398238	0.764921	-1.30733	-17 days down vs -24 days	2.65034	0.426081	0.401913	1
5104	18157707	NM_001169690 // fus // fusilli // 52B3-52B5 // 44095 /// NM_001259418 // fus // fusilli	fus	NM_001169690	NM_001169690 // GO:0007173 // epidermal growth factor receptor signaling pathway // inf	NM_001169690 // GO:0005634 // nucleus // inferred from sequence or structural similarit	NM_001169690 // GO:0000166 // nucleotide binding // inferred from electronic annotation	0.0378047	0.0046576	0.763571	-1.30964	-17 days down vs -24 days	3.86217	0.267204	0.172962	1
3373	18147545	NM_001299844 // retn // retained // 59F5-59F5 // 45976 /// NM_001299845 // retn // reta	retn	NM_001299844	NM_001299844 // GO:0000122 // negative regulation of transcription from RNA polymerase	NM_001299844 // GO:0005634 // nucleus // inferred from direct assay /// NM_001299844 /	NM_001299844 // GO:0000976 // transcription regulatory region sequence-specific DNA bin	0.191984	0.0383391	0.76076	-1.31447	-17 days down vs -24 days	1.87222	0.30754	0.410662	1
4208	18152426	NM_137942 // Ice1 // Interacts with the C terminus of ELL 1 // 59D9-59D9 // 37701 /// F	Ice1	NM_137942	NM_137942 // GO:0007052 // mitotic spindle organization // inferred from mutant phenoty	NM_137942 // GO:0032783 // ELL-EAF complex // inferred from physical interaction /// N	NM_137942 // GO:0003682 // chromatin binding // inferred from direct assay /// FBtr007	0.0685798	0.0100879	0.753071	-1.3279	-17 days down vs -24 days	3.0669	0.307676	0.250804	1
5180	18158259	NM_137424 // CG6362 // CG6362 gene product from transcript CG6362-RA // 54E8-54E8 // 37	CG6362	NM_137424	NM_137424 // GO:0008150 // biological_process // no biological data available /// FBtr	NM_137424 // GO:0005575 // cellular_component // no biological data available /// FBtr	NM_137424 // GO:0003674 // molecular_function // no biological data available /// FBtr	0.0558416	0.0166528	0.750882	-1.33177	-17 days down vs -24 days	3.33159	0.414466	0.311012	1
1335	18136503	---		---	---	---	---	0.0368087	0.0231061	0.744396	-1.34337	-17 days down vs -24 days	3.8999	0.590979	0.378842	1
4531	18154138	---		---	---	---	---	0.0368087	0.0231061	0.744396	-1.34337	-17 days down vs -24 days	3.8999	0.590979	0.378842	1
5986	18162813	---		---	---	---	---	0.0368087	0.0231061	0.744396	-1.34337	-17 days down vs -24 days	3.8999	0.590979	0.378842	1
9130	18180422	NM_176278 // CG33160 // CG33160 gene product from transcript CG33160-RA // 63B12-63B12	CG33160	NM_176278	NM_176278 // GO:0006508 // proteolysis // inferred from electronic annotation /// NM_1	NM_176278 // GO:0005615 // extracellular space // --- /// FBtr0073102 // GO:0005615 //	NM_176278 // GO:0004252 // serine-type endopeptidase activity // inferred from electron	0.277677	0.0432985	0.740288	-1.35083	-17 days down vs -24 days	1.48706	0.313948	0.5278	1
15521	18216902	NM_001297899 // Vha36-3 // Vacuolar H[+] ATPase 36kD subunit 3 // 3A6-3A6 // 31235 ///	Vha36-3	NM_001297899	NM_001297899 // GO:0015991 // ATP hydrolysis coupled proton transport // inferred by cu	NM_001297899 // GO:0000221 // vacuolar proton-transporting V-type ATPase, V1 domain //	NM_001297899 // GO:0042626 // ATPase activity, coupled to transmembrane movement of sub	0.0495485	0.00389098	0.727123	-1.37528	-17 days down vs -24 days	3.49021	0.317605	0.227497	1
2478	18142739	NM_001273350 // CG9586 // CG9586 gene product from transcript CG9586-RB // 30A2-30A2 //	CG9586	NM_001273350	---	---	---	0.0856168	0.0489382	0.723887	-1.38143	-17 days down vs -24 days	2.79171	0.724927	0.649177	1
3674	18149496	NM_001299262 // CG14759 // CG14759 gene product from transcript CG14759-RA // 44C3-44C3	CG14759	NM_001299262	NM_001299262 // GO:0008150 // biological_process // no biological data available /// N	NM_001299262 // GO:0005575 // cellular_component // no biological data available /// N	NM_001299262 // GO:0003674 // molecular_function // no biological data available /// N	0.00574151	0.00176449	0.720168	-1.38856	-17 days down vs -24 days	7.059	0.532794	0.188693	1
226	18130445	---		---	---	---	---	0.0652643	0.0163241	0.717291	-1.39413	-17 days down vs -24 days	3.12984	0.519481	0.414942	1
5035	18157152	---		---	---	---	---	0.0921618	0.0306949	0.707718	-1.41299	-17 days down vs -24 days	2.70268	0.638181	0.590321	1
13396	18205000	NR_004022 // CR40621 // ribosomal RNA // --- // 5740491	CR40621	NR_004022	---	---	---	0.0781152	0.0167941	0.707127	-1.41417	-17 days down vs -24 days	2.90414	0.530391	0.456582	1
16026	18219463	---		---	---	---	---	0.0781152	0.0167941	0.707127	-1.41417	-17 days down vs -24 days	2.90414	0.530391	0.456582	1
171	18130335	---		---	---	---	---	0.0683871	0.0327772	0.703584	-1.42129	-17 days down vs -24 days	3.07046	0.773192	0.629542	1
12277	18198571	NM_142681 // HHEX // HHEX ortholog (H. sapiens) // 93B10-93B10 // 42495 /// FBtr0084037	HHEX	NM_142681	NM_142681 // GO:0006006 // glucose metabolic process // inferred from mutant phenotype	NM_142681 // GO:0005634 // nucleus // inferred from sequence or structural similarity	NM_142681 // GO:0003700 // transcription factor activity, sequence-specific DNA binding	0.0984033	0.0107513	0.693249	-1.44248	-17 days down vs -24 days	2.62443	0.449989	0.428655	1
11466	18193889	---		---	---	---	---	0.218394	0.0325714	0.672694	-1.48656	-17 days down vs -24 days	1.73564	0.554174	0.798227	1
2126	18140727	NM_176032 // NimB4 // Nimrod B4 // 34E5-34E5 // 34814 /// FBtr0080617 // NimB4 // Nimro	NimB4	NM_176032	NM_176032 // GO:0042742 // defense response to bacterium // inferred from sequence or s	NM_176032 // GO:0005576 // extracellular region // not recorded /// NM_176032 // GO:00	NM_176032 // GO:0003674 // molecular_function // no biological data available /// FBtr	0.00557924	0.00318639	0.651934	-1.5339	-17 days down vs -24 days	7.11721	1.09466	0.38451	1
3004	18145489	---		---	---	---	---	0.171249	0.0468244	0.625586	-1.5985	-17 days down vs -24 days	1.99541	1.06703	1.33685	1
9687	18183722	---		---	---	---	---	0.135518	0.0334207	0.62327	-1.60444	-17 days down vs -24 days	2.2543	1.03605	1.14897	1
48	18130089	---		---	---	---	---	0.133064	0.0381622	0.620535	-1.61151	-17 days down vs -24 days	2.27493	1.13544	1.24777	1
255	18130503	---		---	---	---	---	0.194447	0.0366985	0.590025	-1.69484	-17 days down vs -24 days	1.8586	1.11259	1.49654	1
24	18130041	---		---	---	---	---	0.00789313	0.000819729	0.527135	-1.89705	-17 days down vs -24 days	6.43426	1.48036	0.575187	1
8	18130007	---		---	---	---	---	0.00435179	0.00141534	0.479681	-2.08472	-17 days down vs -24 days	7.63563	2.70391	0.885293	1
2035	18140144	---		---	---	---	---	0.0507852	0.0125081	0.447374	-2.23527	-17 days down vs -24 days	3.45722	3.02685	2.18879	1
8127	18175192	---		---	---	---	---	0.0139193	0.014067	0.38489	-2.59815	-17 days down vs -24 days	5.41233	6.98961	3.22856	1
