# Supplementary material
Source: publisher figshare collection journal article supplement (https://brill.figshare.com/articles/dataset/_/24160281)
Supplement: Supplementary file 1 [file 1]

Research article

**Changes in nutrient composition and gene expression in growing mealworms (*Tenebrio molitor*)**

*C. Lopez-Viso*<sup>1,2</sup>, *M. Castellanos-Urbe*<sup>1,3</sup>, *S.T May*<sup>1,3</sup>, *J. Brameld*<sup>1,2</sup>, *A. Salter*<sup>1,2</sup> and *T. Parr*<sup>1,2\*</sup>

<sup>1</sup>School of Biosciences, University of Nottingham, Loughborough, LE12 5RD, UK.; <sup>2</sup>Future Food Beacon, School of Biosciences, University of Nottingham, Loughborough, LE12 5RD, UK. <sup>3</sup>Nottingham Arabidopsis Stock Centre, School of Biosciences, University of Nottingham, Loughborough, LE12 5RD, UK; \*tim.parr@nottingham.ac.uk

**Supplementary material**

**Table S1.** Differentially expressed genes identified by GeneChip analysis comparing day -17 and day -24. Statistical significance is accepted when  $P$ -value  $< 0.05$ . The list is organised from higher to lower Fold Change (FC) values. Gene information corresponds to the *Drosophila melanogaster* genome
